# Supplementary material for: Novel trends of genome evolution in highly complex tropical sponge microbiomes
Source: Microbiome. 2022 Oct 4;10:164. doi: 10.1186/s40168-022-01359-z (PMC9531527; doi:10.1186/s40168-022-01359-z)
Supplement: Supplementary file 7 — Additional file 6: Table S1. Taxonomy, statistics, source metadata, and CSG occurrence in MAGs that passed QC and dereplication steps and were used in the final analyses. The archaeal MAGs and the Trichodesmium MAG that did not meet the completeness threshold are included. [file 40168_2022_1359_MOESM6_ESM.xlsx]

## Sheet: Sheet1
NCBI taxonomy for MAGs produced during this study	NCBI accession for MAGs produced during this study	Bin ID	Source	Present dataset dereplication across-species	Present in dataset dereplication within-species	CSG present	GTDB-Tk taxonomy	Quality (Completeness - 5*Contamination)	Completeness	Contamination	Strain heterogeneity	Genome size (bp)	# ambiguous bases	# scaffolds	# contigs	N50 (scaffolds)	N50 (contigs)	Mean scaffold length (bp)	Mean contig length (bp)	Longest scaffold (bp)	Longest contig (bp)	GC	GC std (scaffolds > 1kbp)	Coding density	# predicted genes
		GCA_001007635.1_ASM100763v1	Aplysina aerophoba	No	Yes	No	d__Bacteria;p__Cyanobacteria;c__Cyanobacteriia;o__Synechococcales;f__Cyanobiaceae;g__Synechococcus_B;s__Synechococcus_B spongiarum_E	83.85	89.95	1.22	0	2209101	16736	229	274	14814	13139	9646	8001	42660	38129	59.2	4.87	87.62	2355
		GCA_002238415.1_ASM223841v1	Aplysina aerophoba	No	Yes	No	d__Bacteria;p__Binatota;c__Binatia;o__Bin18;f__Bin18;g__Bin18;s__Bin18 sp002238415	71.91	88.71	3.36	0	5243325	0	83	83	103191	103191	63172	63172	301668	301668	57.8	1.85	89.55	5330
		GCA_002238425.1_ASM223842v1	Aplysina aerophoba	No	Yes	No	d__Bacteria;p__Chloroflexota;c__Dehalococcoidia;o__UBA2963;f__UBA2963;g__Bin16;s__Bin16 sp002238425	89.77	89.77	0	0	3223809	0	101	101	62928	62928	31918	31918	202044	202044	65.6	2.57	87.22	3223
		GCA_002238445.1_ASM223844v1	Aplysina aerophoba	No	Yes	No	d__Bacteria;p__Chloroflexota;c__Anaerolineae;o__Caldilineales;f__Caldilineaceae;g__Bin5;s__Bin5 sp002238445	86.35	95.45	1.82	0	5553230	0	120	120	64429	64429	46276	46276	317517	317517	58.5	1.61	83.99	4724
		GCA_002238485.1_ASM223848v1	Aplysina aerophoba	No	Yes	No	d__Bacteria;p__Chloroflexota;c__Anaerolineae;o__SBR1031;f__A4b;g__UBA6055;s__UBA6055 sp002238485	91.82	91.82	0	0	3661680	0	22	22	250998	250998	166440	166440	912990	912990	59.3	0.73	92.48	3233
		GCA_002238505.1_ASM223850v1	Aplysina aerophoba	No	Yes	No	d__Bacteria;p__Chloroflexota;c__Dehalococcoidia;o__UBA3495;f__UBA3495;g__Bin22;s__Bin22 sp002238505	87.79	97.69	1.98	0	4393250	0	58	58	163655	163655	75745	75745	1117843	1117843	59.2	2.66	82.91	4136
		GCA_002238525.1_ASM223852v1	Aplysina aerophoba	No	Yes	No	d__Bacteria;p__Bacteroidota;c__Bacteroidia;o__Flavobacteriales;f__Flavobacteriaceae;g__Bin25;s__Bin25 sp002238525	97.06	97.06	0	0	2958200	0	124	124	40599	40599	23856	23856	143003	143003	36.2	2.6	84.74	2571
		GCA_002238555.1_ASM223855v1	Aplysina aerophoba	No	Yes	No	d__Bacteria;p__Chloroflexota;c__Anaerolineae;o__Caldilineales;f__Bin34;g__Bin34;s__Bin34 sp002238555	94.55	94.55	0	0	4630258	0	111	111	63615	63615	41714	41714	175788	175788	63.1	1.74	85.56	4069
		GCA_002238565.1_ASM223856v1	Aplysina aerophoba	No	Yes	No	d__Bacteria;p__Proteobacteria;c__Alphaproteobacteria;o__Rhodobacterales;f__Rhodobacteraceae;g__Bin36;s__Bin36 sp002238565	89.04	91.04	0.4	100	5604958	0	201	201	44410	44410	27885	27885	157223	157223	58	2.48	81.61	5419
		GCA_002238605.1_ASM223860v1	Aplysina aerophoba	No	Yes	No	d__Bacteria;p__Gemmatimonadota;c__Gemmatimonadetes;o__SG8-23;f__UBA6960;g__BD2-11;s__BD2-11 sp002238605	76.9	98.9	4.4	0	4472840	0	65	65	132700	132700	68812	68812	313282	313282	68	2.09	90.05	3663
		GCA_002238645.1_ASM223864v1	Aplysina aerophoba	No	Yes	No	d__Bacteria;p__Proteobacteria;c__Alphaproteobacteria;o__Nisaeales;f__Nisaeaceae;g__Bin52;s__Bin52 sp002238645	89.39	93.74	0.87	0	4202507	0	120	120	52938	52938	35020	35020	119588	119588	66.5	1.57	88.35	3998
		GCA_002238685.1_ASM223868v1	Aplysina aerophoba	No	Yes	No	d__Bacteria;p__Proteobacteria;c__Alphaproteobacteria;o__SP197;f__SP197;g__SP197;s__SP197 sp002238685	94.35	94.35	0	0	4529396	0	102	102	78682	78682	44405	44405	281839	281839	63.7	1.6	88.5	4329
		GCA_002238725.1_ASM223872v1	Aplysina aerophoba	No	Yes	No	d__Bacteria;p__Proteobacteria;c__Alphaproteobacteria;o__Bin65;f__Bin65;g__Bin65;s__Bin65 sp002238725	95.46	97.61	0.43	0	4288405	0	94	94	72338	72338	45621	45621	321900	321900	66.2	1.97	87.64	4030
		GCA_002238765.1_ASM223876v1	Aplysina aerophoba	No	Yes	Yes	d__Bacteria;p__Nitrospirota;c__Nitrospiria;o__Nitrospirales;f__UBA8639;g__Bin75;s__Bin75 sp002238765	80.44	94.09	2.73	0	3038306	0	115	115	44884	44884	26420	26420	176720	176720	56.2	2.73	86.36	3122
		GCA_002238785.1_ASM223878v1	Aplysina aerophoba	No	Yes	No	d__Bacteria;p__Actinobacteriota;c__Acidimicrobiia;o__UBA5794;f__Bin76;g__Bin76;s__Bin76 sp002238785	88.47	94.87	1.28	0	3484732	0	82	82	108948	108948	42496	42496	257041	257041	61.6	2.1	88.54	3289
		GCA_002238805.1_ASM223880v1	Aplysina aerophoba	No	Yes	No	d__Bacteria;p__Bacteroidota;c__Rhodothermia;o__Rhodothermales;f__Bin80;g__Bin80;s__Bin80 sp002238805	84.76	91.81	1.41	33.33	4077491	0	192	192	34696	34696	21236	21236	155236	155236	51	2.07	87.26	3773
		GCA_002238825.1_ASM223882v1	Aplysina aerophoba	No	Yes	No	d__Bacteria;p__Chloroflexota;c__Dehalococcoidia;o__UBA3495;f__UBA3495;g__Bin87;s__Bin87 sp002238825	96.59	96.59	0	0	4958136	0	67	67	269076	269076	74002	74002	757257	757257	62.8	2.01	84.95	4733
		GCA_002238855.1_ASM223885v1	Aplysina aerophoba	No	Yes	No	d__Bacteria;p__Chloroflexota;c__Dehalococcoidia;o__SAR202;f__UBA11138;g__Bin90;s__Bin90 sp002238855	87.46	95.71	1.65	0	4606320	0	213	213	50603	50603	21625	21625	169007	169007	57.1	2.56	85.57	4546
		GCA_002238865.1_ASM223886v1	Aplysina aerophoba	No	Yes	No	d__Bacteria;p__Gemmatimonadota;c__Gemmatimonadetes;o__SG8-23;f__UBA6960;g__Bin94;s__Bin94 sp002238865	81.3	97.8	3.3	0	4420540	0	83	83	89414	89414	53259	53259	327699	327699	66.9	1.86	91.6	3696
		GCA_002238905.1_ASM223890v1	Aplysina aerophoba	No	Yes	No	d__Bacteria;p__Proteobacteria;c__Alphaproteobacteria;o__Bin98;f__Bin98;g__Bin98;s__Bin98 sp002238905	91.21	91.21	0	0	1583477	0	105	105	46493	46493	15080	15080	125038	125038	40.6	2.07	84.42	1473
		GCA_002238925.1_ASM223892v1	Aplysina aerophoba	No	Yes	No	d__Bacteria;p__Spirochaetota;c__Spirochaetia;o__Spirochaetales;f__RBG-16-67-19;g__Bin103;s__Bin103 sp002238925	88.15	94.8	1.33	0	4776897	0	96	96	71825	71825	49759	49759	252458	252458	67.4	2.06	90.03	4399
		GCA_002238965.1_ASM223896v1	Aplysina aerophoba	No	Yes	No	d__Bacteria;p__UBA8248;c__UBA8248;o__UBA8248;f__UBA8248;g__Bin107;s__Bin107 sp002238965	90.19	94.44	0.85	0	4372169	0	60	60	165774	165774	72869	72869	432448	432448	59.5	3.3	85.74	4035
		GCA_002239005.1_ASM223900v1	Aplysina aerophoba	No	Yes	No	d__Bacteria;p__Deinococcota;c__Deinococci;o__Deinococcales;f__Trueperaceae;g__MPNL01;s__MPNL01 sp002239005	82.2	87.5	1.06	0	3211324	0	91	91	62429	62429	35289	35289	236204	236204	62.2	2.89	83.73	3024
		GCA_002239025.1_ASM223902v1	Aplysina aerophoba	No	Yes	Yes	d__Bacteria;p__Chloroflexota;c__Dehalococcoidia;o__Bin125;f__Bin125;g__Bin125;s__Bin125 sp002239025	89.77	94.72	0.99	0	3681665	0	66	66	125355	125355	55782	55782	515095	515095	62.3	2.6	88.62	3486
		GCA_002239045.1_ASM223904v1	Aplysina aerophoba	No	Yes	No	d__Bacteria;p__Chloroflexota;c__Dehalococcoidia;o__UBA1151;f__Bin127;g__Bin127;s__Bin127 sp002239045	85.61	95.51	1.98	0	3017767	0	21	21	309970	309970	143703	143703	507178	507178	56.3	2.28	89.75	2915
		GCA_002239065.1_ASM223906v1	Aplysina aerophoba	No	Yes	No	d__Bacteria;p__Proteobacteria;c__Alphaproteobacteria;o__Defluviicoccales;f__Defluviicoccaceae;g__Defluviicoccus;s__Defluviicoccus sp002239065	85.32	86.57	0.25	0	4831323	0	122	122	56772	56772	39601	39601	188752	188752	69.5	1.94	90.39	4718
		GCA_002239085.1_ASM223908v1	Aplysina aerophoba	No	Yes	No	d__Bacteria;p__Proteobacteria;c__Alphaproteobacteria;o__Rhodobacterales;f__Rhodobacteraceae;g__Bin36;s__Bin36 sp002239085	74.93	87.93	2.6	48	3744517	0	416	416	19278	19278	9001	9001	148007	148007	42	3.5	80.46	3521
		GCA_002239105.1_ASM223910v1	Aplysina aerophoba	No	Yes	No	d__Bacteria;p__Actinobacteriota;c__Acidimicrobiia;o__Microtrichales;f__Bin134;g__Bin134;s__Bin134 sp002239105	94.43	96.58	0.43	0	3684518	0	77	77	91761	91761	47850	47850	269317	269317	64.3	1.8	93.03	3532
Candidatus Poribacteria bacterium	JAJDSU000000000	jk18x11bins.12	Ircinia campana	No	Yes	No	d__Bacteria;p__Poribacteria;c__WGA-4E;o__WGA-4E;f__WGA-3G;g__;s__	85.54	96.54	2.2	0	4832465	0	226	226	29533	29533	21382	21382	161750	161750	41.8	1.23	89.27	4064
Rhodothermales bacterium	JAJDSV000000000	jk18x11bins.2	Ircinia campana	Yes	Yes	Yes	d__Bacteria;p__Bacteroidota;c__Rhodothermia;o__Rhodothermales;f__;g__;s__	81.8	94.35	2.51	57.14	2800960	0	225	225	17596	17596	12448	12448	73924	73924	61.1	2.29	90.59	2369
Gammaproteobacteria bacterium	JAJDSW000000000	jk18x11bins.22	Ircinia campana	Yes	Yes	No	d__Bacteria;p__Proteobacteria;c__Gammaproteobacteria;o__GCA-2400775;f__;g__;s__	80.49	87.09	1.32	20	1826842	0	115	115	20105	20105	15885	15885	77559	77559	50.7	2.17	90.85	1836
Alphaproteobacteria bacterium	JAJDSX000000000	jk18x11bins.24	Ircinia campana	No	Yes	Yes	d__Bacteria;p__Proteobacteria;c__Alphaproteobacteria;o__Bin65;f__Bin65;g__Bin65;s__	81.01	96.96	3.19	33.33	4413592	0	310	310	23632	23632	14237	14237	86888	86888	67.5	2.16	88.1	4315
Thermoanaerobaculia bacterium	JAJDSY000000000	jk18x11bins.26	Ircinia campana	Yes	Yes	No	d__Bacteria;p__Acidobacteriota;c__Thermoanaerobaculia;o__UBA5704;f__;g__;s__	81.82	94.87	2.61	25	4488167	0	330	330	20643	20643	13600	13600	80717	80717	68.7	1.59	93.83	3823
Pseudomonadales bacterium	JAJDSZ000000000	jk18x11bins.34	Ircinia campana	Yes	Yes	Yes	d__Bacteria;p__Proteobacteria;c__Gammaproteobacteria;o__Pseudomonadales;f__Pseudohongiellaceae;g__;s__	84.31	86.91	0.52	33.33	2861414	0	130	130	33504	33504	22010	22010	105676	105676	62	1.86	90.62	2618
Acidimicrobiia bacterium	JAJDTA000000000	jk18x11bins.4	Ircinia campana	Yes	Yes	No	d__Bacteria;p__Actinobacteriota;c__Acidimicrobiia;o__Microtrichales;f__Bin134;g__Bin134;s__	78.63	95.73	3.42	14.29	3767610	0	237	237	24187	24187	15897	15897	75986	75986	64.9	1.88	93.33	3729
Gemmatimonadetes bacterium	JAJDTB000000000	jk18x11bins.40	Ircinia campana	Yes	Yes	No	d__Bacteria;p__Gemmatimonadota;c__Gemmatimonadetes;o__SG8-23;f__UBA6960;g__Bin94;s__	86.8	97.8	2.2	0	4796200	0	75	75	139609	139609	63949	63949	443570	443570	67.7	2.1	91.24	3962
Rhodothermales bacterium	JAJDTC000000000	jk18x11bins.48	Ircinia campana	Yes	Yes	Yes	d__Bacteria;p__Bacteroidota;c__Rhodothermia;o__Rhodothermales;f__Bin80;g__Bin80;s__	90.42	93.22	0.56	0	3783429	0	118	118	44405	44405	32062	32062	105844	105844	51.4	1.37	88.32	3228
Anaerolineae bacterium	JAJDTD000000000	jk18x11bins.51	Ircinia campana	No	Yes	No	d__Bacteria;p__Chloroflexota;c__Anaerolineae;o__SBR1031;f__A4b;g__UBA6055;s__	84.55	90	1.09	100	4140768	0	222	222	29381	29381	18652	18652	188642	188642	58.6	1.67	90.14	3697
Gammaproteobacteria bacterium	JAJDTE000000000	jk18x11bins.53	Ircinia campana	Yes	Yes	Yes	d__Bacteria;p__Proteobacteria;c__Gammaproteobacteria;o__UBA10353;f__LS-SOB;g__;s__	89.94	92.99	0.61	0	3852133	0	239	239	23682	23682	16117	16117	117893	117893	62.5	2.54	87.38	3719
Acidimicrobiia bacterium	JAJDTF000000000	jk18x11bins.54	Ircinia campana	Yes	Yes	No	d__Bacteria;p__Actinobacteriota;c__Acidimicrobiia;o__Microtrichales;f__TK06;g__;s__	82.84	98.29	3.09	20	3797146	0	163	163	36399	36399	23295	23295	176629	176629	67.1	1.57	91.11	3639
Candidatus Dadabacteria bacterium	JAJDTG000000000	jk18x11bins.6	Ircinia campana	Yes	Yes	No	d__Bacteria;p__Dadabacteria;c__UBA1144;o__;f__;g__;s__	92.39	96.59	0.84	0	1774962	0	25	25	147618	147618	70998	70998	222911	222911	50.5	1.72	90.38	1656
Candidatus Latescibacteria bacterium	JAJDTH000000000	jk18x11bins.7	Ircinia campana	No	Yes	No	d__Bacteria;p__Latescibacterota;c__UBA2968;o__UBA2968;f__;g__;s__	88.6	95.6	1.4	25	5392186	0	326	326	22917	22917	16540	16540	72761	72761	50.9	1.65	92.53	4925
Candidatus Poribacteria bacterium	JAJEBA000000000	jk18x8bins.13	Ircinia campana	No	Yes	No	d__Bacteria;p__Poribacteria;c__WGA-4E;o__WGA-4E;f__WGA-3G;g__WGA-3G;s__	79.94	96.44	3.3	0	5686363	0	226	226	38145	38145	25160	25160	188212	188212	47.7	1.7	87.53	5054
Anaerolineae bacterium	JAJEBB000000000	jk18x8bins.18	Ircinia campana	No	Yes	No	d__Bacteria;p__Chloroflexota;c__Anaerolineae;o__SBR1031;f__A4b;g__UBA6055;s__	82.22	91.82	1.92	33.33	4152573	0	81	81	94428	94428	51266	51266	398012	398012	59.5	1.43	89.11	3666
Prochlorococcaceae cyanobacterium	JAJEBC000000000	jk18x8bins.2	Ircinia campana	Yes	Yes	No	d__Bacteria;p__Cyanobacteria;c__Cyanobacteriia;o__Synechococcales;f__Cyanobiaceae;g__Synechococcus_B;s__	82.06	85.46	0.68	33.33	2207226	0	139	139	24257	24257	15879	15879	74146	74146	60.5	2.59	85.27	2520
Chloroflexi bacterium	JAJEBD000000000	jk18x8bins.21	Ircinia campana	No	Yes	No	d__Bacteria;p__Chloroflexota;c__UBA2235;o__;f__;g__;s__	85.31	85.31	0	0	3051112	0	404	404	9185	9185	7552	7552	30188	30188	63.1	2.06	81.25	2766
Anaerolineae bacterium	JAJEBE000000000	jk18x8bins.27	Ircinia campana	Yes	Yes	No	d__Bacteria;p__Chloroflexota;c__Anaerolineae;o__SBR1031;f__A4b;g__UBA6055;s__	91.82	91.82	0	0	4267033	0	62	62	124910	124910	68823	68823	227229	227229	58.9	1.48	89.77	3740
Caldilineaceae bacterium	JAJEBF000000000	jk18x8bins.28	Ircinia campana	Yes	Yes	No	d__Bacteria;p__Chloroflexota;c__Anaerolineae;o__Caldilineales;f__Caldilineaceae;g__Bin5;s__	80.44	98.64	3.64	50	5020844	0	61	61	138113	138113	82308	82308	590205	590205	60.6	1.32	86.18	4221
Rhodobacteraceae bacterium	JAJEBG000000000	jk18x8bins.29	Ircinia campana	Yes	Yes	No	d__Bacteria;p__Proteobacteria;c__Alphaproteobacteria;o__Rhodobacterales;f__Rhodobacteraceae;g__Bin36;s__	90.98	90.98	0	0	2261279	0	62	62	53392	53392	36472	36472	187308	187308	51.1	1.44	88.33	2193
Alphaproteobacteria bacterium	JAJEBH000000000	jk18x8bins.7	Ircinia campana	Yes	Yes	Yes	d__Bacteria;p__Proteobacteria;c__Alphaproteobacteria;o__Bin95;f__Bin95;g__Bin95;s__	96.71	98.76	0.41	0	4721762	0	236	236	32940	32940	20007	20007	156814	156814	68.2	2.28	89.41	4652
Silicimonas sp.	JAJDZT000000000	jk18x7bins.10	Ircinia cf. reteplana	Yes	Yes	No	d__Bacteria;p__Proteobacteria;c__Alphaproteobacteria;o__Rhodobacterales;f__Rhodobacteraceae;g__Silicimonas;s__	80.68	91.18	2.1	14.29	4068271	0	158	158	47780	47780	25748	25748	208241	208241	58.2	1.84	90.92	4228
Chloroflexi bacterium	JAJDZU000000000	jk18x7bins.100	Ircinia cf. reteplana	Yes	Yes	No	d__Bacteria;p__Chloroflexota_B;c__UBA11872;o__UBA11872;f__UBA11872;g__;s__	72.55	91.05	3.7	0	3365424	0	25	25	180828	180828	134616	134616	535471	535471	65.6	0.98	89.09	3122
Anaerolineae bacterium	JAJDZV000000000	jk18x7bins.101	Ircinia cf. reteplana	Yes	Yes	No	d__Bacteria;p__Chloroflexota;c__Anaerolineae;o__SBR1031;f__A4b;g__UBA6055;s__	80.9	85.45	0.91	0	3265347	0	14	14	335732	335732	233239	233239	897348	897348	59.4	0.62	90.56	2865
Gammaproteobacteria bacterium	JAJDZW000000000	jk18x7bins.104	Ircinia cf. reteplana	No	Yes	Yes	d__Bacteria;p__Proteobacteria;c__Gammaproteobacteria;o__UBA6522;f__UBA6522;g__FEN-1219;s__	76.1	86.65	2.11	0	3753675	0	56	56	91400	91400	67029	67029	267361	267361	65	1.81	90.49	3313
Alphaproteobacteria bacterium	JAJDZX000000000	jk18x7bins.108	Ircinia cf. reteplana	Yes	Yes	No	d__Bacteria;p__Proteobacteria;c__Alphaproteobacteria;o__UBA7887;f__GCA-2721365;g__;s__	75.97	87.17	2.24	0	3746776	0	133	133	57411	57411	28171	28171	220390	220390	66.8	2.19	84.47	3621
Rhodothermales bacterium	JAJDZY000000000	jk18x7bins.111	Ircinia cf. reteplana	Yes	No (due to stochasticity in dereplication pipeline)	No	d__Bacteria;p__Bacteroidota;c__Rhodothermia;o__Rhodothermales;f__Bin80;g__Bin80;s__	88.73	91.53	0.56	0	3578104	0	164	164	29953	29953	21817	21817	79158	79158	51.5	1.75	88.77	3047
Opitutales bacterium	JAJDZZ000000000	jk18x7bins.13	Ircinia cf. reteplana	Yes	Yes	Yes	d__Bacteria;p__Verrucomicrobiota;c__Verrucomicrobiae;o__Opitutales;f__UBA2995;g__UBA2995;s__	96.62	96.62	0	0	3385173	0	92	92	70881	70881	36795	36795	229418	229418	54.6	1.57	89.31	2671
Anaerolineae bacterium	JAJEAA000000000	jk18x7bins.23	Ircinia cf. reteplana	Yes	Yes	No	d__Bacteria;p__Chloroflexota;c__Anaerolineae;o__SBR1031;f__A4b;g__UBA6055;s__	90	90	0	0	4180195	0	37	37	224885	224885	112978	112978	533857	533857	58.5	0.93	89.88	3619
Anaerolineae bacterium	JAJEAB000000000	jk18x7bins.24	Ircinia cf. reteplana	No	Yes	No	d__Bacteria;p__Chloroflexota;c__Anaerolineae;o__SBR1031;f__A4b;g__UBA6055;s__	84.54	89.09	0.91	0	4035030	0	249	249	25372	25372	16204	16204	144776	144776	59.8	1.69	89.13	3614
Silicimonas sp.	JAJEAC000000000	jk18x7bins.26	Ircinia cf. reteplana	Yes	Yes	No	d__Bacteria;p__Proteobacteria;c__Alphaproteobacteria;o__Rhodobacterales;f__Rhodobacteraceae;g__Silicimonas;s__	84.44	90.99	1.31	22.22	4813171	0	208	208	45319	45319	23140	23140	186663	186663	61.7	1.6	86.4	4776
Gammaproteobacteria bacterium	JAJEAD000000000	jk18x7bins.3	Ircinia cf. reteplana	Yes	Yes	No	d__Bacteria;p__Proteobacteria;c__Gammaproteobacteria;o__HK1;f__HK1;g__;s__	59.95	86.35	5.28	0	4975948	0	101	101	111940	111940	49266	49266	367161	367161	68.3	1.24	88.2	4440
Nitrospirales bacterium	JAJEAE000000000	jk18x7bins.31	Ircinia cf. reteplana	No	Yes	Yes	d__Bacteria;p__Nitrospirota;c__Nitrospiria;o__Nitrospirales;f__UBA8639;g__Bin75;s__	77.52	96.82	3.86	16.67	2314919	0	109	109	30789	30789	21237	21237	117748	117748	56.7	1.81	88.5	2289
Pseudomonadales bacterium	JAJEAF000000000	jk18x7bins.32	Ircinia cf. reteplana	Yes	Yes	Yes	d__Bacteria;p__Proteobacteria;c__Gammaproteobacteria;o__Pseudomonadales;f__Pseudohongiellaceae;g__;s__	76.65	93.1	3.29	52.38	2504980	0	106	106	40541	40541	23631	23631	132120	132120	62	1.37	90.83	2292
Candidatus Poribacteria bacterium	JAJEAG000000000	jk18x7bins.36	Ircinia cf. reteplana	Yes	Yes	No	d__Bacteria;p__Poribacteria;c__WGA-4E;o__WGA-4E;f__WGA-3G;g__;s__	81.84	93.09	2.25	0	4451420	0	100	100	76278	76278	44514	44514	204589	204589	40.1	1.39	87.41	3748
Chloroflexi bacterium	JAJEAH000000000	jk18x7bins.44	Ircinia cf. reteplana	Yes	Yes	No	d__Bacteria;p__Chloroflexota_B;c__UBA11872;o__;f__;g__;s__	90.76	90.76	0	0	3368419	0	87	87	55651	55651	38717	38717	160609	160609	63	1.39	80.56	2782
Candidatus Binatia bacterium	JAJEAI000000000	jk18x7bins.45	Ircinia cf. reteplana	Yes	Yes	No	d__Bacteria;p__Binatota;c__Binatia;o__UBA9968;f__;g__;s__	86.56	94.96	1.68	0	4831205	0	209	209	37623	37623	23115	23115	128590	128590	65.6	1.87	86.55	4351
Alphaproteobacteria bacterium	JAJEAJ000000000	jk18x7bins.47	Ircinia cf. reteplana	No	Yes	No	d__Bacteria;p__Proteobacteria;c__Alphaproteobacteria;o__Bin65;f__Bin65;g__Bin65;s__	87.7	87.7	0	0	3706890	0	67	67	103434	103434	55326	55326	246782	246782	67.5	1.55	88.63	3472
Prochlorococcaceae cyanobacterium	JAJEAK000000000	jk18x7bins.48	Ircinia cf. reteplana	No	Yes	No	d__Bacteria;p__Cyanobacteria;c__Cyanobacteriia;o__Synechococcales;f__Cyanobiaceae;g__Synechococcus_B;s__	86.05	90.35	0.86	20	2148527	0	163	163	18446	18446	13181	13181	69277	69277	60.2	1.84	85.02	2547
Candidatus Poribacteria bacterium	JAJEAL000000000	jk18x7bins.5	Ircinia cf. reteplana	Yes	Yes	No	d__Bacteria;p__Poribacteria;c__WGA-4E;o__WGA-4E;f__;g__;s__	71.98	90.38	3.68	0	5604615	0	147	147	59716	59716	38126	38126	236083	236083	49.8	1.61	87.58	4888
Candidatus Binatia bacterium	JAJEAM000000000	jk18x7bins.52	Ircinia cf. reteplana	Yes	Yes	Yes	d__Bacteria;p__Binatota;c__Binatia;o__Bin18;f__Bin18;g__Bin18;s__Bin18 sp002238415	74.61	95.61	4.2	0	4829499	0	168	168	53443	53443	28747	28747	159009	159009	58	1.69	90.72	4843
Candidatus Latescibacteria bacterium	JAJEAN000000000	jk18x7bins.54	Ircinia cf. reteplana	Yes	Yes	No	d__Bacteria;p__Latescibacterota;c__;o__;f__;g__;s__	97.8	97.8	0	0	3798376	0	9	9	2542542	2542542	422041	422041	2542542	2542542	62	0.82	90.59	3149
Acidobacteria bacterium	JAJEAO000000000	jk18x7bins.57	Ircinia cf. reteplana	Yes	Yes	No	d__Bacteria;p__Acidobacteriota;c__Bin61;o__Bin61;f__Bin61;g__Bin61;s__	82.5	86.75	0.85	0	3535856	0	120	120	47329	47329	29465	29465	142641	142641	70.5	1.54	91.12	2969
Alphaproteobacteria bacterium	JAJEAP000000000	jk18x7bins.59	Ircinia cf. reteplana	Yes	Yes	Yes	d__Bacteria;p__Proteobacteria;c__Alphaproteobacteria;o__UBA828;f__UBA828;g__;s__	40.97	95.27	10.86	18.42	5037209	0	327	327	23987	23987	15404	15404	113839	113839	68.4	2.19	88.62	4674
Trichodesmium sp.	JAJEAQ000000000	jk18x7bins.61	Ircinia cf. reteplana	No (completeness <85%)	No (completeness <85%)	Not evaluated	d__Bacteria;p__Cyanobacteria;c__Cyanobacteriia;o__Cyanobacteriales;f__Phormidiaceae;g__Trichodesmium;s__	77.04	80.84	0.76	0	5351501	0	823	823	7392	7392	6502	6502	27274	27274	37.9	2.03	66.02	5390
Alphaproteobacteria bacterium	JAJEAR000000000	jk18x7bins.67	Ircinia cf. reteplana	Yes	Yes	No	d__Bacteria;p__Proteobacteria;c__Alphaproteobacteria;o__Nisaeales;f__Nisaeaceae;g__Bin52;s__	82.37	92.17	1.96	0	4665660	0	87	87	116447	116447	53628	53628	274964	274964	66.7	1.51	87.61	4371
Defluviicoccus sp.	JAJEAS000000000	jk18x7bins.70	Ircinia cf. reteplana	No	Yes	No	d__Bacteria;p__Proteobacteria;c__Alphaproteobacteria;o__Defluviicoccales;f__Defluviicoccaceae;g__Defluviicoccus;s__	73.36	95.16	4.36	15.38	4410550	0	314	314	24574	24574	14046	14046	117679	117679	67.7	1.58	91.35	4368
Anaerolineae bacterium	JAJEAT000000000	jk18x7bins.73	Ircinia cf. reteplana	No	Yes	No	d__Bacteria;p__Chloroflexota;c__Anaerolineae;o__SBR1031;f__A4b;g__UBA6055;s__	90	90	0	0	3606532	0	134	134	50631	50631	26914	26914	235783	235783	60.2	1.61	90.98	3201
Dehalococcoidia bacterium	JAJEAU000000000	jk18x7bins.79	Ircinia cf. reteplana	Yes	Yes	No	d__Bacteria;p__Chloroflexota;c__Dehalococcoidia;o__UBA1151;f__Bin127;g__Bin127;s__	95.21	95.21	0	0	2544548	0	23	23	133041	133041	110632	110632	344053	344053	56.7	0.58	90.42	2357
Gammaproteobacteria bacterium	JAJEAV000000000	jk18x7bins.8	Ircinia cf. reteplana	Yes	Yes	Yes	d__Bacteria;p__Proteobacteria;c__Gammaproteobacteria;o__UBA10353;f__LS-SOB;g__;s__	89.94	92.99	0.61	0	2556949	0	92	92	41214	41214	27792	27792	140946	140946	49.7	1.56	87.85	2458
Prochlorococcaceae cyanobacterium	JAJEAW000000000	jk18x7bins.84	Ircinia cf. reteplana	No	Yes	No	d__Bacteria;p__Cyanobacteria;c__Cyanobacteriia;o__Synechococcales;f__Cyanobiaceae;g__Synechococcus_B;s__	85.08	89.18	0.82	33.33	1710610	0	114	114	20643	20643	15005	15005	59430	59430	62	1.69	91.57	1792
Candidatus Latescibacteria bacterium	JAJEAX000000000	jk18x7bins.9	Ircinia cf. reteplana	Yes	Yes	No	d__Bacteria;p__Latescibacterota;c__UBA2968;o__UBA2968;f__;g__;s__	80.36	90.11	1.95	40	4604569	0	433	433	13968	13968	10634	10634	54891	54891	50.7	2.05	92.52	4404
Rhodobacter sp.	JAJEAY000000000	jk18x7bins.92	Ircinia cf. reteplana	Yes	Yes	No	d__Bacteria;p__Proteobacteria;c__Alphaproteobacteria;o__Rhodobacterales;f__Rhodobacteraceae;g__Rhodobacter_B;s__	85.69	91.69	1.2	10	4796143	0	288	288	26793	26793	16653	16653	162273	162273	59.2	1.42	84.29	4801
Alphaproteobacteria bacterium	JAJEAZ000000000	jk18x7bins.95	Ircinia cf. reteplana	Yes	Yes	No	d__Bacteria;p__Proteobacteria;c__Alphaproteobacteria;o__Bin95;f__Bin95;g__Bin95;s__	50.64	92.74	8.42	71.43	5041421	0	734	734	7822	7822	6868	6868	84166	84166	68.2	2.29	88.92	5333
Gemmatimonadetes bacterium	JAJEBI000000000	jk18x9bins.12	Ircinia cf. reteplana	No	Yes	Yes	d__Bacteria;p__Gemmatimonadota;c__Gemmatimonadetes;o__SG8-23;f__UBA6960;g__Bin94;s__	83.51	94.51	2.2	0	4359252	0	51	51	164121	164121	85475	85475	360021	360021	67.8	0.94	92.31	3585
Alphaproteobacteria bacterium	JAJEBJ000000000	jk18x9bins.14	Ircinia cf. reteplana	Yes	Yes	No	d__Bacteria;p__Proteobacteria;c__Alphaproteobacteria;o__SP197;f__SP197;g__SP197;s__	79.27	87.02	1.55	12.5	3455935	0	498	498	8600	8600	6939	6939	44674	44674	63.6	1.64	90.69	3570
Anaerolineae bacterium	JAJEBK000000000	jk18x9bins.15	Ircinia cf. reteplana	Yes	Yes	No	d__Bacteria;p__Chloroflexota;c__Anaerolineae;o__SBR1031;f__A4b;g__UBA6055;s__	89.09	89.09	0	0	3510296	0	55	55	115198	115198	63823	63823	267294	267294	59.2	0.74	91.41	3105
Candidatus Latescibacteria bacterium	JAJEBL000000000	jk18x9bins.18	Ircinia cf. reteplana	No	Yes	No	d__Bacteria;p__Latescibacterota;c__UBA2968;o__UBA2968;f__;g__;s__	93.41	93.41	0	0	4870236	0	94	94	74678	74678	51811	51811	179564	179564	51	1.2	92.79	4282
Gammaproteobacteria bacterium	JAJEBM000000000	jk18x9bins.20	Ircinia cf. reteplana	No	Yes	Yes	d__Bacteria;p__Proteobacteria;c__Gammaproteobacteria;o__UBA10353;f__LS-SOB;g__;s__	87.09	90.14	0.61	0	3546236	0	145	145	32555	32555	24456	24456	134850	134850	62.5	1.84	87.31	3374
Acidimicrobiia bacterium	JAJEBN000000000	jk18x9bins.27	Ircinia cf. reteplana	Yes	Yes	No	d__Bacteria;p__Actinobacteriota;c__Acidimicrobiia;o__Microtrichales;f__TK06;g__;s__	82.49	97.44	2.99	0	3552445	0	114	114	56420	56420	31161	31161	211472	211472	67.7	1.73	92.05	3223
Acidimicrobiia bacterium	JAJEBO000000000	jk18x9bins.28	Ircinia cf. reteplana	Yes	Yes	No	d__Bacteria;p__Actinobacteriota;c__Acidimicrobiia;o__Microtrichales;f__UBA11606;g__;s__	82.84	89.74	1.38	0	3742478	0	113	113	48898	48898	33119	33119	163951	163951	69.8	1.68	92.13	3540
Candidatus Poribacteria bacterium	JAJEBP000000000	jk18x9bins.33	Ircinia cf. reteplana	No	Yes	No	d__Bacteria;p__Poribacteria;c__WGA-4E;o__WGA-4E;f__WGA-3G;g__WGA-3G;s__	85.44	96.44	2.2	0	5365633	0	193	193	38548	38548	27801	27801	119023	119023	47.8	1.34	87.72	4709
Rhodobacteraceae bacterium	JAJEBQ000000000	jk18x9bins.35	Ircinia cf. reteplana	Yes	Yes	No	d__Bacteria;p__Proteobacteria;c__Alphaproteobacteria;o__Rhodobacterales;f__Rhodobacteraceae;g__Bin36;s__	90.01	90.01	0	0	2910643	0	61	61	69198	69198	47715	47715	180700	180700	43.1	1.24	85.89	2788
Gemmatimonadetes bacterium	JAJEBR000000000	jk18x9bins.40	Ircinia cf. reteplana	Yes	Yes	No	d__Bacteria;p__Gemmatimonadota;c__Gemmatimonadetes;o__SG8-23;f__UBA6960;g__Bin94;s__	87.9	98.9	2.2	0	4289885	0	129	129	61497	61497	33254	33254	258773	258773	68.1	2.1	89.7	3737
Gemmatimonadetes bacterium	JAJEBS000000000	jk18x9bins.46	Ircinia cf. reteplana	Yes	Yes	No	d__Bacteria;p__Gemmatimonadota;c__Gemmatimonadetes;o__SG8-23;f__UBA6960;g__BD2-11;s__	68.89	90.89	4.4	25	4401535	0	339	339	20170	20170	12983	12983	99733	99733	68.2	1.85	90.82	3811
Alphaproteobacteria bacterium	JAJEBT000000000	jk18x9bins.50	Ircinia cf. reteplana	Yes	Yes	No	d__Bacteria;p__Proteobacteria;c__Alphaproteobacteria;o__Defluviicoccales;f__UBA830;g__;s__	82.53	93.48	2.19	12.5	4980426	0	222	222	53369	53369	22434	22434	173399	173399	65	2	87.37	4683
Dehalococcoidia bacterium	JAJEBU000000000	jk18x9bins.53	Ircinia cf. reteplana	Yes	Yes	No	d__Bacteria;p__Chloroflexota;c__Dehalococcoidia;o__Bin125;f__Bin125;g__Bin125;s__	81.85	91.75	1.98	0	2721176	0	158	158	28044	28044	17222	17222	172766	172766	65.2	1.93	92.2	2731
Thermoanaerobaculia bacterium	JAJEBV000000000	jk18x9bins.56	Ircinia cf. reteplana	Yes	Yes	No	d__Bacteria;p__Acidobacteriota;c__Thermoanaerobaculia;o__UBA5704;f__;g__;s__	80.36	93.16	2.56	0	4380128	0	50	50	111833	111833	87602	87602	393481	393481	68.7	0.82	93.94	3604
Gemmatimonadetes bacterium	JAJEBW000000000	jk18x9bins.57	Ircinia cf. reteplana	Yes	Yes	No	d__Bacteria;p__Gemmatimonadota;c__Gemmatimonadetes;o__SG8-23;f__UBA6960;g__Bin94;s__	76.91	93.41	3.3	0	3484285	0	49	49	102961	102961	71107	71107	396843	396843	68.4	1.04	90.65	2785
Candidatus Dadabacteria bacterium	JAJEBX000000000	jk18x9bins.60	Ircinia cf. reteplana	No	Yes	No	d__Bacteria;p__Dadabacteria;c__UBA1144;o__;f__;g__;s__	86.92	91.12	0.84	0	1574799	0	32	32	69980	69980	49212	49212	154078	154078	50.1	1.56	90.19	1480
Anaerolineae bacterium	JAJEBY000000000	jk18x9bins.61	Ircinia cf. reteplana	Yes	Yes	No	d__Bacteria;p__Chloroflexota;c__Anaerolineae;o__SBR1031;f__A4b;g__UBA6055;s__	85.02	91.82	1.36	0	3667285	0	16	16	771650	771650	229205	229205	1362686	1362686	58.3	1.27	89.97	3169
Candidatus Poribacteria bacterium	JAJEBZ000000000	jk18x9bins.65	Ircinia cf. reteplana	Yes	Yes	No	d__Bacteria;p__Poribacteria;c__WGA-4E;o__WGA-4E;f__WGA-3G;g__;s__	82.84	94.34	2.3	0	4534173	0	320	320	19508	19508	14169	14169	87793	87793	41.5	1.49	86.56	3852
Acidimicrobiia bacterium	JAJECA000000000	jk18x9bins.74	Ircinia cf. reteplana	Yes	Yes	No	d__Bacteria;p__Actinobacteriota;c__Acidimicrobiia;o__Microtrichales;f__Bin134;g__Bin134;s__	84.17	94.87	2.14	0	3484893	0	64	64	117523	117523	54451	54451	335093	335093	65.2	1.4	93.53	3334
Gammaproteobacteria bacterium	JAJECB000000000	jk18x9bins.76	Ircinia cf. reteplana	Yes	Yes	No	d__Bacteria;p__Proteobacteria;c__Gammaproteobacteria;o__HK1;f__;g__;s__	50.88	91.38	8.1	0	4828019	0	533	533	11343	11343	9058	9058	58607	58607	69.5	2.12	88.01	4659
Rhodospirillales bacterium	JAJECC000000000	jk18x9bins.84	Ircinia cf. reteplana	Yes	Yes	Yes	d__Bacteria;p__Proteobacteria;c__Alphaproteobacteria;o__Rhodospirillales_A;f__;g__;s__	86.72	95.02	1.66	50	3757546	0	181	181	31160	31160	20759	20759	156783	156783	63.2	2.21	90.14	3622
Candidatus Poribacteria bacterium	JAJECD000000000	jk18x9bins.85	Ircinia cf. reteplana	Yes	Yes	No	d__Bacteria;p__Poribacteria;c__WGA-4E;o__WGA-4E;f__WGA-3G;g__WGA-3G;s__	66.74	89.19	4.49	0	4299609	0	422	422	12839	12839	10188	10188	53261	53261	48.3	1.46	90.02	4016
Rhodothermales bacterium	JAJECE000000000	jk18x9bins.87	Ircinia cf. reteplana	No	Yes	Yes	d__Bacteria;p__Bacteroidota;c__Rhodothermia;o__Rhodothermales;f__Bin80;g__Bin80;s__	89.27	94.92	1.13	50	3712701	0	132	132	38622	38622	28126	28126	149128	149128	51.5	1.52	88.29	3208
Alphaproteobacteria bacterium	JAJECF000000000	jk18x9bins.88	Ircinia cf. reteplana	Yes	Yes	Yes	d__Bacteria;p__Proteobacteria;c__Alphaproteobacteria;o__Bin95;f__Bin95;g__Bin95;s__	63.62	90.92	5.46	57.14	4384728	0	244	244	28166	28166	17970	17970	111927	111927	67.7	2.16	90.02	4295
Caldilineaceae bacterium	JAJECG000000000	jk18x9bins.9	Ircinia cf. reteplana	No	Yes	No	d__Bacteria;p__Chloroflexota;c__Anaerolineae;o__Caldilineales;f__Caldilineaceae;g__Bin5;s__	74.98	93.18	3.64	20	4689379	0	59	59	114828	114828	79481	79481	510256	510256	60.7	1.08	86.36	3956
Pseudomonadales bacterium	JAJDTI000000000	jk18x1bzbins.11	Ircinia felix	Yes	Yes	Yes	d__Bacteria;p__Proteobacteria;c__Gammaproteobacteria;o__Pseudomonadales;f__HTCC2089;g__;s__	75.07	88.02	2.59	20	4964149	0	208	208	38698	38698	23866	23866	125046	125046	69.3	1.05	91.65	4618
Candidatus Poribacteria bacterium	JAJDTJ000000000	jk18x1bzbins.18	Ircinia felix	Yes	Yes	No	d__Bacteria;p__Poribacteria;c__WGA-4E;o__WGA-4E;f__WGA-3G;g__WGA-3G;s__	75.64	92.14	3.3	0	5624549	0	151	151	55276	55276	37248	37248	269908	269908	47.7	0.97	89.18	4762
Candidatus Latescibacteria bacterium	JAJDTK000000000	jk18x1bzbins.19	Ircinia felix	Yes	Yes	No	d__Bacteria;p__Latescibacterota;c__;o__;f__;g__;s__	97.8	97.8	0	0	3889421	0	27	27	230195	230195	144052	144052	533431	533431	61.9	1.5	90.23	3320
Caldilineaceae bacterium	JAJDTL000000000	jk18x1bzbins.24	Ircinia felix	Yes	Yes	No	d__Bacteria;p__Chloroflexota;c__Anaerolineae;o__Caldilineales;f__Caldilineaceae;g__Bin5;s__	90	94.55	0.91	100	5198253	0	54	54	176397	176397	96263	96263	450488	450488	61.7	1.03	86.92	4416
Candidatus Poribacteria bacterium	JAJDTM000000000	jk18x1bzbins.25	Ircinia felix	Yes	Yes	No	d__Bacteria;p__Poribacteria;c__WGA-4E;o__WGA-4E;f__WGA-3G;g__WGA-3G;s__	76.24	93.09	3.37	0	6135135	0	65	65	159246	159246	94386	94386	536594	536594	47.6	0.88	88.75	4979
Candidatus Latescibacteria bacterium	JAJDTN000000000	jk18x1bzbins.27	Ircinia felix	Yes	Yes	No	d__Bacteria;p__Latescibacterota;c__UBA2968;o__UBA8231;f__UBA8231;g__UBA8231;s__	71.86	94.16	4.46	16.67	4866986	0	452	452	14694	14694	10767	10767	58205	58205	70.2	2	93.56	4421
Acidimicrobiia bacterium	JAJDTO000000000	jk18x1bzbins.28	Ircinia felix	Yes	Yes	No	d__Bacteria;p__Actinobacteriota;c__Acidimicrobiia;o__Microtrichales;f__TK06;g__;s__	79.04	98.29	3.85	0	3584073	0	33	33	246091	246091	108608	108608	487871	487871	67.5	0.9	92.67	3206
Dehalococcoidia bacterium	JAJDTP000000000	jk18x1bzbins.29	Ircinia felix	Yes	Yes	No	d__Bacteria;p__Chloroflexota;c__Dehalococcoidia;o__UBA3495;f__UBA3495;g__Bin87;s__	96.59	96.59	0	0	3791936	0	35	35	278525	278525	108341	108341	794960	794960	62.8	0.96	86.89	3729
Candidatus Binatia bacterium	JAJDTQ000000000	jk18x1bzbins.34	Ircinia felix	Yes	Yes	No	d__Bacteria;p__Binatota;c__Binatia;o__UBA9968;f__;g__;s__	56.15	100	8.77	0	4679395	0	287	287	25406	25406	16304	16304	123681	123681	65.5	1.77	89.83	4447
Candidatus Poribacteria bacterium	JAJDTR000000000	jk18x1bzbins.36	Ircinia felix	Yes	Yes	No	d__Bacteria;p__Poribacteria;c__WGA-4E;o__WGA-4E;f__WGA-3G;g__;s__	73.73	88.18	2.89	15.38	5568535	0	171	171	47413	47413	32564	32564	222439	222439	50.6	1.84	83.01	4643
Caldilineaceae bacterium	JAJDTS000000000	jk18x1bzbins.37	Ircinia felix	Yes	Yes	No	d__Bacteria;p__Chloroflexota;c__Anaerolineae;o__Caldilineales;f__Caldilineaceae;g__Bin5;s__	68.1	95.35	5.45	33.33	5363005	0	307	307	24027	24027	17469	17469	123414	123414	60	1.61	85.06	4499
Acidobacteria bacterium	JAJDTT000000000	jk18x1bzbins.39	Ircinia felix	Yes	Yes	No	d__Bacteria;p__Acidobacteriota;c__UBA6911;o__;f__;g__;s__	93.11	93.11	0	0	5326528	0	318	318	25535	25535	16750	16750	95727	95727	63.3	1.7	89.16	4407
Dehalococcoidia bacterium	JAJDTU000000000	jk18x1bzbins.41	Ircinia felix	Yes	Yes	Yes	d__Bacteria;p__Chloroflexota;c__Dehalococcoidia;o__Bin125;f__Bin125;g__Bin125;s__	88.58	93.53	0.99	0	3002002	0	14	14	463807	463807	214428	214428	699511	699511	65	0.86	91.67	2790
Candidatus Latescibacteria bacterium	JAJDTV000000000	jk18x1bzbins.42	Ircinia felix	Yes	Yes	No	d__Bacteria;p__Latescibacterota;c__UBA2968;o__UBA2968;f__;g__;s__	93.01	94.51	0.3	0	5695786	0	77	77	108713	108713	73971	73971	351542	351542	51	0.9	92.52	5060
Gammaproteobacteria bacterium	JAJDTW000000000	jk18x1bzbins.48	Ircinia felix	No	Yes	No	d__Bacteria;p__Proteobacteria;c__Gammaproteobacteria;o__HK1;f__;g__;s__	48.89	87.49	7.72	11.76	4933343	0	251	251	36280	36280	19654	19654	103085	103085	69.4	1.94	88.87	4546
Bryobacterales bacterium	JAJDTX000000000	jk18x1bzbins.53	Ircinia felix	Yes	Yes	No	d__Bacteria;p__Acidobacteriota;c__Acidobacteriae;o__Bryobacterales;f__UBA6623;g__;s__	79.29	92.09	2.56	0	5965398	0	196	196	50791	50791	30435	30435	183989	183989	63.9	2.02	88.16	4799
Candidatus Binatia bacterium	JAJDTY000000000	jk18x1bzbins.55	Ircinia felix	Yes	Yes	No	d__Bacteria;p__Binatota;c__Binatia;o__Bin18;f__Bin18;g__Bin18;s__	70.07	92.12	4.41	28.57	4714322	0	86	86	84194	84194	54817	54817	454506	454506	58	1.54	90.56	4726
Nitrospirales bacterium	JAJDTZ000000000	jk18x1bzbins.57	Ircinia felix	No	Yes	Yes	d__Bacteria;p__Nitrospirota;c__Nitrospiria;o__Nitrospirales;f__UBA8639;g__Bin75;s__	74.07	92.27	3.64	0	2418325	0	68	68	55401	55401	35563	35563	147690	147690	56.5	1.62	87.44	2439
Candidatus Dadabacteria bacterium	JAJDUA000000000	jk18x1bzbins.60	Ircinia felix	Yes	Yes	No	d__Bacteria;p__Dadabacteria;c__UBA1144;o__;f__;g__;s__	84.82	93.22	1.68	0	1784951	0	69	69	33453	33453	25868	25868	90314	90314	50.4	1.72	89.51	1726
Gammaproteobacteria bacterium	JAJDUB000000000	jk18x1bzbins.61	Ircinia felix	Yes	Yes	Yes	d__Bacteria;p__Proteobacteria;c__Gammaproteobacteria;o__UBA4486;f__UBA4486;g__;s__	72.72	88.62	3.18	5.26	3432623	0	83	83	69946	69946	41356	41356	199552	199552	56.7	1.96	93.09	3114
Anaerolineae bacterium	JAJDUC000000000	jk18x1bzbins.63	Ircinia felix	Yes	Yes	No	d__Bacteria;p__Chloroflexota;c__Anaerolineae;o__SBR1031;f__A4b;g__UBA6055;s__	90.45	90.45	0	0	4085682	0	131	131	42715	42715	31188	31188	211918	211918	58.8	1.19	89.33	3568
Acidobacteria bacterium	JAJDUD000000000	jk18x1bzbins.64	Ircinia felix	Yes	Yes	No	d__Bacteria;p__Acidobacteriota;c__Bin61;o__Bin61;f__Bin61;g__Bin61;s__	81.62	90.17	1.71	0	3984390	0	77	77	119215	119215	51745	51745	337534	337534	69.4	1.77	89.06	3321
Dehalococcoidia bacterium	JAJDUE000000000	jk18x1bzbins.66	Ircinia felix	Yes	Yes	No	d__Bacteria;p__Chloroflexota;c__Dehalococcoidia;o__UBA2963;f__UBA2963;g__Bin16;s__	46.42	89.77	8.67	76.92	2385782	0	339	339	8940	8940	7037	7037	41390	41390	66.9	1.61	92.15	2556
Chloroflexi bacterium	JAJDUF000000000	jk18x1bzbins.67	Ircinia felix	Yes	Yes	No	d__Bacteria;p__Chloroflexota;c__UBA2235;o__UBA12225;f__;g__;s__	93.09	94.14	0.21	0	4144006	0	23	23	329333	329333	180174	180174	807276	807276	65.5	0.61	88.23	3724
Acidobacteria bacterium	JAJDUG000000000	jk18x1bzbins.7	Ircinia felix	Yes	Yes	No	d__Bacteria;p__Acidobacteriota;c__Acidobacteriae;o__;f__;g__;s__	94.9	99.15	0.85	0	4617834	0	81	81	96834	96834	57010	57010	246235	246235	62.4	1.62	87.52	3642
Candidatus Poribacteria bacterium	JAJDUH000000000	jk18x1bzbins.72	Ircinia felix	Yes	Yes	No	d__Bacteria;p__Poribacteria;c__WGA-4E;o__WGA-4E;f__WGA-3G;g__WGA-3G;s__	71.14	93.14	4.4	0	5093395	0	80	80	87523	87523	63667	63667	306881	306881	47.1	0.75	88.22	4349
Thermoanaerobaculia bacterium	JAJDUI000000000	jk18x1bzbins.73	Ircinia felix	Yes	Yes	No	d__Bacteria;p__Acidobacteriota;c__Thermoanaerobaculia;o__UBA5704;f__;g__;s__	85.47	94.02	1.71	0	4388733	0	38	38	192796	192796	115492	115492	525212	525212	68.6	0.83	94.12	3444
Acidimicrobiia bacterium	JAJDUJ000000000	jk18x1bzbins.74	Ircinia felix	Yes	Yes	No	d__Bacteria;p__Actinobacteriota;c__Acidimicrobiia;o__Microtrichales;f__Bin134;g__Bin134;s__	89.33	95.73	1.28	0	3452426	0	31	31	156955	156955	111368	111368	527922	527922	65	0.99	94	3227
Alphaproteobacteria bacterium	JAJDUK000000000	jk18x1bzbins.75	Ircinia felix	Yes	Yes	Yes	d__Bacteria;p__Proteobacteria;c__Alphaproteobacteria;o__UBA828;f__UBA828;g__;s__	75.61	98.01	4.48	18.75	4627015	0	106	106	94505	94505	43651	43651	301752	301752	67.5	2.15	89.85	4313
Gemmatimonadetes bacterium	JAJDUL000000000	jk18x1bzbins.77	Ircinia felix	Yes	Yes	No	d__Bacteria;p__Gemmatimonadota;c__Gemmatimonadetes;o__;f__;g__;s__	64.81	86.81	4.4	25	3275917	0	73	73	70184	70184	44875	44875	209192	209192	69.1	0.86	93.71	2835
Candidatus Poribacteria bacterium	JAJDUM000000000	jk18x1bzbins.78	Ircinia felix	Yes	Yes	No	d__Bacteria;p__Poribacteria;c__WGA-4E;o__WGA-4E;f__;g__;s__	59.35	88.95	5.92	20	6043612	0	127	127	79657	79657	47587	47587	220222	220222	49.9	1.32	86.87	5203
Dehalococcoidia bacterium	JAJDUN000000000	jk18x1bzbins.79	Ircinia felix	Yes	Yes	No	d__Bacteria;p__Chloroflexota;c__Dehalococcoidia;o__UBA3495;f__UBA3495;g__;s__	81.85	86.8	0.99	100	3775265	0	441	441	10599	10599	8560	8560	38752	38752	61.6	1.7	85.95	3980
Pseudomonadales bacterium	JAJDUO000000000	jk18x1bzbins.81	Ircinia felix	No	Yes	Yes	d__Bacteria;p__Proteobacteria;c__Gammaproteobacteria;o__Pseudomonadales;f__HTCC2089;g__UBA2168;s__	60.6	87.55	5.39	0	4384395	0	210	210	28482	28482	20878	20878	99001	99001	64.4	1.94	92.92	4129
Gemmatimonadetes bacterium	JAJDUP000000000	jk18x1bzbins.83	Ircinia felix	Yes	Yes	No	d__Bacteria;p__Gemmatimonadota;c__Gemmatimonadetes;o__SG8-23;f__UBA6960;g__Bin94;s__	77.95	88.95	2.2	0	4393182	0	61	61	226106	226106	72019	72019	448350	448350	67.5	1.96	91.6	3637
Gammaproteobacteria bacterium	JAJDUQ000000000	jk18x1bzbins.85	Ircinia felix	Yes	Yes	No	d__Bacteria;p__Proteobacteria;c__Gammaproteobacteria;o__HK1;f__HK1;g__;s__	61.9	90.85	5.79	15.38	6230357	0	346	346	28207	28207	18006	18006	160702	160702	66.1	1.84	86.94	5935
Dehalococcoidia bacterium	JAJDUR000000000	jk18x1bzbins.86	Ircinia felix	Yes	Yes	No	d__Bacteria;p__Chloroflexota;c__Dehalococcoidia;o__UBA2991;f__UBA2991;g__UBA2991;s__	66.01	90.76	4.95	40	2735415	0	127	127	34765	34765	21538	21538	99890	99890	69.4	1.28	92.58	2870
Prochlorococcaceae cyanobacterium	JAJDUS000000000	jk18x1bzbins.87	Ircinia felix	Yes	Yes	No	d__Bacteria;p__Cyanobacteria;c__Cyanobacteriia;o__Synechococcales;f__Cyanobiaceae;g__Synechococcus_B;s__	92.59	94.84	0.45	33.33	2490333	0	145	145	21993	21993	17174	17174	83635	83635	59.8	1.85	84.86	2861
Candidatus Latescibacteria bacterium	JAJDUT000000000	jk18x1bzbins.88	Ircinia felix	Yes	Yes	No	d__Bacteria;p__Latescibacterota;c__UBA2968;o__UBA8231;f__GCA-002724215;g__GCA-2724215;s__	78.64	96.64	3.6	0	6157998	0	142	142	69826	69826	43366	43366	156548	156548	58.7	1.38	92.82	5349
Chloroflexi bacterium	JAJDUU000000000	jk18x1bzbins.9	Ircinia felix	Yes	Yes	No	d__Bacteria;p__Chloroflexota_B;c__UBA11872;o__UBA11872;f__UBA11872;g__;s__	82.51	92.41	1.98	0	3165920	0	52	52	127510	127510	60883	60883	309255	309255	67.7	1.25	88.41	2836
Pseudomonadales bacterium	JAJECH000000000	jk18xAbins.10	Ircinia felix	Yes	Yes	Yes	d__Bacteria;p__Proteobacteria;c__Gammaproteobacteria;o__Pseudomonadales;f__HTCC2089;g__Bin55;s__	78.41	85.81	1.48	0	3750259	0	63	63	117370	117370	59527	59527	302154	302154	51.2	1.17	89.35	3425
Candidatus Dadabacteria bacterium	JAJECI000000000	jk18xAbins.11	Ircinia felix	No	Yes	No	d__Bacteria;p__Dadabacteria;c__UBA1144;o__;f__;g__;s__	88.19	96.59	1.68	0	1627159	0	12	12	279255	279255	135596	135596	287969	287969	51.6	1.12	91.27	1517
Acidimicrobiia bacterium	JAJECJ000000000	jk18xAbins.18	Ircinia felix	Yes	Yes	No	d__Bacteria;p__Actinobacteriota;c__Acidimicrobiia;o__Microtrichales;f__Bin134;g__Bin134;s__	81.43	89.98	1.71	0	3403639	0	332	332	13471	13471	10251	10251	47587	47587	64.7	1.93	93.43	3501
Candidatus Poribacteria bacterium	JAJECK000000000	jk18xAbins.19	Ircinia felix	Yes	Yes	No	d__Bacteria;p__Poribacteria;c__WGA-4E;o__WGA-4E;f__WGA-3G;g__;s__	86.33	97.58	2.25	0	5634213	0	158	158	52890	52890	35659	35659	154946	154946	41.2	1.46	86.69	4682
Candidatus Binatia bacterium	JAJECL000000000	jk18xAbins.2	Ircinia felix	No	Yes	Yes	d__Bacteria;p__Binatota;c__Binatia;o__Bin18;f__Bin18;g__Bin18;s__	42.4	88.6	9.24	0	4547484	0	437	437	12965	12965	10406	10406	76011	76011	58	1.95	90.18	4833
Rhodobacteraceae bacterium	JAJECM000000000	jk18xAbins.20	Ircinia felix	No	Yes	No	d__Bacteria;p__Proteobacteria;c__Alphaproteobacteria;o__Rhodobacterales;f__Rhodobacteraceae;g__Bin36;s__	89.61	89.61	0	0	3037137	0	108	108	37481	37481	28121	28121	136917	136917	43.1	1.29	84.94	2941
Candidatus Poribacteria bacterium	JAJECN000000000	jk18xAbins.24	Ircinia felix	Yes	Yes	No	d__Bacteria;p__Poribacteria;c__WGA-4E;o__WGA-4E;f__WGA-3G;g__WGA-3G;s__	83.34	94.34	2.2	0	5686627	0	62	62	147804	147804	91719	91719	442246	442246	47.4	0.92	88.86	4736
Candidatus Poribacteria bacterium	JAJECO000000000	jk18xAbins.25	Ircinia felix	Yes	Yes	No	d__Bacteria;p__Poribacteria;c__WGA-4E;o__WGA-4E;f__;g__;s__	67.69	96.64	5.79	0	6000819	0	97	97	110440	110440	61864	61864	289660	289660	50	1.24	87.33	5003
Acidimicrobiia bacterium	JAJECP000000000	jk18xAbins.26	Ircinia felix	Yes	Yes	No	d__Bacteria;p__Actinobacteriota;c__Acidimicrobiia;o__Microtrichales;f__TK06;g__;s__	83.34	98.29	2.99	0	3310788	0	41	41	111289	111289	80750	80750	424324	424324	67.3	1.21	92.56	2987
Bryobacterales bacterium	JAJECQ000000000	jk18xAbins.27	Ircinia felix	Yes	Yes	No	d__Bacteria;p__Acidobacteriota;c__Acidobacteriae;o__Bryobacterales;f__UBA6623;g__;s__	73.12	94.47	4.27	0	6946379	0	569	569	17874	17874	12208	12208	97862	97862	63.5	2.37	88.33	6052
Candidatus Latescibacteria bacterium	JAJECR000000000	jk18xAbins.29	Ircinia felix	Yes	Yes	No	d__Bacteria;p__Latescibacterota;c__;o__;f__;g__;s__	78.56	89.56	2.2	0	3215086	0	400	400	9978	9978	8037	8037	49974	49974	61.7	1.72	90.78	3025
Chloroflexi bacterium	JAJECS000000000	jk18xAbins.3	Ircinia felix	Yes	Yes	No	d__Bacteria;p__Chloroflexota_B;c__UBA11872;o__UBA11872;f__UBA11872;g__;s__	89.44	89.44	0	0	2950031	0	31	31	166445	166445	95162	95162	384694	384694	67.3	1.06	89.43	2643
Rhodothermales bacterium	JAJECT000000000	jk18xAbins.31	Ircinia felix	No	Yes	Yes	d__Bacteria;p__Bacteroidota;c__Rhodothermia;o__Rhodothermales;f__;g__;s__	87.85	93.5	1.13	0	2815196	0	45	45	104802	104802	62559	62559	194738	194738	60.8	1.59	90.26	2254
Nitrospirales bacterium	JAJECU000000000	jk18xAbins.40	Ircinia felix	Yes	Yes	Yes	d__Bacteria;p__Nitrospirota;c__Nitrospiria;o__Nitrospirales;f__UBA8639;g__Bin75;s__	82.98	97.73	2.95	0	2482794	0	128	128	26255	26255	19396	19396	106529	106529	56.3	1.87	88.08	2552
Rhodothermales bacterium	JAJECV000000000	jk18xAbins.42	Ircinia felix	Yes	Yes	Yes	d__Bacteria;p__Bacteroidota;c__Rhodothermia;o__Rhodothermales;f__Bin80;g__Bin80;s__	91.53	91.53	0	0	3679169	0	147	147	34852	34852	25028	25028	179993	179993	51.5	1.62	88.12	3178
Pseudomonadales bacterium	JAJECW000000000	jk18xAbins.44	Ircinia felix	Yes	Yes	Yes	d__Bacteria;p__Proteobacteria;c__Gammaproteobacteria;o__Pseudomonadales;f__Pseudohongiellaceae;g__;s__	81.47	90.12	1.73	14.29	3381995	0	153	153	29634	29634	22104	22104	145353	145353	61.2	2.04	89.46	3030
Anaerolineae bacterium	JAJECX000000000	jk18xAbins.45	Ircinia felix	Yes	Yes	No	d__Bacteria;p__Chloroflexota;c__Anaerolineae;o__SBR1031;f__A4b;g__UBA6055;s__	92.73	92.73	0	0	4408255	0	44	44	150305	150305	100187	100187	660559	660559	57.9	0.73	90.56	3908
Acidobacteria bacterium	JAJECY000000000	jk18xAbins.46	Ircinia felix	Yes	Yes	No	d__Bacteria;p__Acidobacteriota;c__Acidobacteriae;o__;f__;g__;s__	78.4	97.15	3.75	0	4397938	0	312	312	19827	19827	14095	14095	74789	74789	62.4	1.97	87.3	3680
Alphaproteobacteria bacterium	JAJECZ000000000	jk18xAbins.48	Ircinia felix	Yes	Yes	Yes	d__Bacteria;p__Proteobacteria;c__Alphaproteobacteria;o__Bin95;f__Bin95;g__Bin95;s__	76.09	89.54	2.69	62.5	4001897	0	554	554	8768	8768	7223	7223	43802	43802	68.3	2.14	90.21	4306
Gammaproteobacteria bacterium	JAJEDA000000000	jk18xAbins.49	Ircinia felix	Yes	Yes	No	d__Bacteria;p__Proteobacteria;c__Gammaproteobacteria;o__UBA4486;f__UBA4486;g__;s__	74.88	89.83	2.99	7.14	3487512	0	116	116	47398	47398	30064	30064	117202	117202	56.6	2.37	93.02	3175
Candidatus Poribacteria bacterium	JAJEDB000000000	jk18xAbins.50	Ircinia felix	Yes	Yes	No	d__Bacteria;p__Poribacteria;c__WGA-4E;o__WGA-4E;f__WGA-3G;g__WGA-3G;s__	71.25	87.75	3.3	0	4968181	0	151	151	61315	61315	32901	32901	247591	247591	48.6	1.47	88.2	4372
Prochlorococcaceae cyanobacterium	JAJEDC000000000	jk18xAbins.51	Ircinia felix	No	Yes	No	d__Bacteria;p__Cyanobacteria;c__Cyanobacteriia;o__Synechococcales;f__Cyanobiaceae;g__Synechococcus_B;s__	87.64	87.64	0	0	2086968	0	171	171	16232	16232	12204	12204	57163	57163	60.1	2.1	84.55	2482
Acidimicrobiia bacterium	JAJEDD000000000	jk18xAbins.52	Ircinia felix	Yes	Yes	No	d__Bacteria;p__Actinobacteriota;c__Acidimicrobiia;o__Microtrichales;f__UBA11606;g__;s__	85.05	91.45	1.28	0	3189184	0	47	47	101337	101337	67854	67854	248401	248401	69.1	1.06	90.26	2844
Chloroflexi bacterium	JAJEDE000000000	jk18xAbins.55	Ircinia felix	Yes	Yes	No	d__Bacteria;p__Chloroflexota_B;c__UBA11872;o__UBA11872;f__UBA11872;g__;s__	78.85	92.75	2.78	0	3548874	0	28	28	153056	153056	126745	126745	433906	433906	65.7	1.02	88.74	3297
Thermoanaerobaculia bacterium	JAJEDF000000000	jk18xAbins.6	Ircinia felix	Yes	Yes	No	d__Bacteria;p__Acidobacteriota;c__Thermoanaerobaculia;o__UBA5704;f__;g__;s__	77.83	86.38	1.71	0	4477025	0	100	100	82342	82342	44770	44770	161889	161889	68.6	1.21	93.55	3651
Alphaproteobacteria bacterium	JAJEDG000000000	jk18xAbins.60	Ircinia felix	No	Yes	No	d__Bacteria;p__Proteobacteria;c__Alphaproteobacteria;o__UBA7887;f__;g__;s__	45.71	97.41	10.34	0	3561540	0	29	29	519924	519924	122811	122811	983191	983191	65.4	1.66	85.7	3398
Prochlorococcaceae cyanobacterium	JAJEDH000000000	jk18xAbins.61	Ircinia felix	No	Yes	No	d__Bacteria;p__Cyanobacteria;c__Cyanobacteriia;o__Synechococcales;f__Cyanobiaceae;g__Synechococcus_B;s__	84.65	92.8	1.63	0	1807227	0	56	56	50098	50098	32271	32271	154055	154055	61.8	1.95	90.91	1872
Caldilineaceae bacterium	JAJEDI000000000	jk18xAbins.63	Ircinia felix	Yes	Yes	No	d__Bacteria;p__Chloroflexota;c__Anaerolineae;o__Caldilineales;f__Caldilineaceae;g__Bin5;s__	93.18	93.18	0	0	5488239	0	102	102	72842	72842	53806	53806	330724	330724	59.7	1.53	85.77	4615
Caldilineaceae bacterium	JAJEDJ000000000	jk18xAbins.67	Ircinia felix	Yes	Yes	No	d__Bacteria;p__Chloroflexota;c__Anaerolineae;o__Caldilineales;f__Caldilineaceae;g__Bin5;s__	97.27	97.27	0	0	4865707	0	58	58	133545	133545	83891	83891	375760	375760	60.5	1.37	89.4	4114
		GCA_009835325.1_ASM983532v1	Ircinia ramosa	No	Yes	No	d__Bacteria;p__Latescibacterota;c__;o__;f__;g__;s__	97.74	97.74	0	0	3676089	520	119	135	46777	43926	30891	27226	127129	115090	62.4	1.52	91.81	3158
		GCA_009835395.1_ASM983539v1	Ircinia ramosa	No	Yes	No	d__Bacteria;p__Actinobacteriota;c__Acidimicrobiia;o__Microtrichales;f__Bin134;g__;s__	89.33	95.73	1.28	0	3156972	730	95	114	64909	50792	33231	27686	164789	164789	70.1	1.48	91.97	2850
		GCA_009835805.1_ASM983580v1	Ircinia ramosa	No	Yes	No	d__Bacteria;p__Proteobacteria;c__Gammaproteobacteria;o__Pseudomonadales;f__HTCC2089;g__UBA2168;s__	83.54	92.49	1.79	60	4183513	6910	335	423	18487	14830	12488	9873	79549	79549	64	2.47	92.57	3969
		GCA_009835985.1_ASM983598v1	Ircinia ramosa	No	Yes	No	d__Bacteria;p__Acidobacteriota;c__Bin61;o__Bin61;f__Bin61;g__Bin61;s__	87.63	91.88	0.85	0	3339507	500	124	138	42074	37730	26931	24195	171469	171469	69.4	1.31	91.57	2833
		GCA_009836005.1_ASM983600v1	Ircinia ramosa	No	Yes	No	d__Bacteria;p__Gemmatimonadota;c__Gemmatimonadetes;o__;f__;g__;s__	79.1	95.6	3.3	0	3599158	260	114	122	55937	50997	31571	29499	158930	158930	69.4	1.44	93.56	3069
		GCA_009836025.1_ASM983602v1	Ircinia ramosa	No	Yes	No	d__Bacteria;p__Cyanobacteria;c__Cyanobacteriia;o__Synechococcales;f__Cyanobiaceae;g__Synechococcus_B;s__	94.93	94.93	0	0	2161298	280	201	211	14241	13112	10752	10241	54982	54982	61.9	2.5	85.99	2287
		GCA_009836085.1_ASM983608v1	Ircinia ramosa	No	Yes	No	d__Bacteria;p__Bacteroidota;c__Rhodothermia;o__Rhodothermales;f__;g__;s__	89.55	95.2	1.13	0	2786366	660	73	85	76634	74236	38169	32773	215117	215117	58.8	2.6	91.51	2251
		GCA_009836145.1_ASM983614v1	Ircinia ramosa	No	Yes	Yes	d__Bacteria;p__Nitrospirota;c__Nitrospiria;o__Nitrospirales;f__UBA8639;g__Bin75;s__	87.69	93.64	1.19	0	2248817	640	293	357	9555	8518	7675	6297	60675	34180	56.1	2.93	87.8	2253
		GCA_009836165.1_ASM983616v1	Ircinia ramosa	No	Yes	No	d__Bacteria;p__Actinobacteriota;c__Acidimicrobiia;o__Microtrichales;f__UBA11606;g__;s__	78.9	89.6	2.14	33.33	3416945	1410	171	213	34354	28437	19982	16035	128380	96891	69.2	1.78	89.75	3266
		GCA_009836215.1_ASM983621v1	Ircinia ramosa	No	Yes	No	d__Bacteria;p__Bacteroidota;c__Rhodothermia;o__Rhodothermales;f__Bin80;g__Bin80;s__	93.25	96.05	0.56	0	3403306	694	137	147	34980	33904	24841	23147	107134	91314	50.1	1.68	89.35	2912
		GCA_009836525.1_ASM983652v1	Ircinia ramosa	No	Yes	Yes	d__Bacteria;p__Proteobacteria;c__Alphaproteobacteria;o__Bin65;f__Bin65;g__Bin65;s__	96.11	98.26	0.43	0	4066446	260	198	224	35635	33065	20537	18152	113385	94283	67.9	2.27	88.79	3810
		GCA_009836625.1_ASM983662v1	Ircinia ramosa	No	Yes	No	d__Bacteria;p__Acidobacteriota;c__Thermoanaerobaculia;o__UBA5704;f__;g__;s__	86.32	94.87	1.71	0	4317546	550	15	25	647589	328056	287836	172679	1427113	1427113	68.4	0.93	94.94	3567
		GCA_009836695.1_ASM983669v1	Ircinia ramosa	No	Yes	Yes	d__Bacteria;p__Chloroflexota;c__Dehalococcoidia;o__Bin125;f__Bin125;g__Bin125;s__	85.81	90.76	0.99	0	3079541	840	60	72	78702	64147	51325	42759	168191	168191	64.1	1.05	91.11	2857
		GCA_009837085.1_ASM983708v1	Ircinia ramosa	No	Yes	No	d__Bacteria;p__Acidobacteriota;c__Thermoanaerobaculia;o__UBA5704;f__;g__;s__	85.18	93.73	1.71	0	4322360	1370	164	274	48732	25125	26355	15770	191369	102284	68.3	2.15	93.92	3706
		GCA_009837275.1_ASM983727v1	Ircinia ramosa	No	Yes	No	d__Bacteria;p__Proteobacteria;c__Alphaproteobacteria;o__Rhodobacterales;f__Rhodobacteraceae;g__Bin36;s__	88	88	0	0	2655481	1990	165	193	26689	22399	16093	13748	119775	99634	44.4	2.49	89.13	2469
		GCA_009837285.1_ASM983728v1	Ircinia ramosa	No	Yes	No	d__Bacteria;p__Chloroflexota;c__Dehalococcoidia;o__UBA2979;f__;g__;s__	87.2	88.85	0.33	100	2401769	300	153	174	26564	25679	15697	13801	59420	59420	70.1	1.5	90.3	2355
		GCA_009837355.1_ASM983735v1	Ircinia ramosa	No	Yes	No	d__Bacteria;p__Chloroflexota;c__Dehalococcoidia;o__UBA3495;f__UBA3495;g__Bin87;s__	96.59	96.59	0	0	3250911	420	89	95	64798	64363	36527	34215	288177	288177	63	2.08	89.99	3127
		GCA_009837395.1_ASM983739v1	Ircinia ramosa	No	Yes	No	d__Bacteria;p__Latescibacterota;c__;o__;f__;g__;s__	97.74	97.74	0	0	3796658	830	47	58	228752	171318	80779	65445	606908	606908	62.3	4.12	91.4	3211
		GCA_009837475.1_ASM983747v1	Ircinia ramosa	No	Yes	No	d__Bacteria;p__Actinobacteriota;c__Acidimicrobiia;o__Microtrichales;f__UBA11606;g__;s__	83.34	89.74	1.28	0	3494407	350	32	49	240057	176887	109200	71307	407126	344000	68.8	1.45	93.83	3181
		GCA_009837725.1_ASM983772v1	Ircinia ramosa	No	Yes	No	d__Bacteria;p__Proteobacteria;c__Gammaproteobacteria;o__Pseudomonadales;f__HTCC2089;g__;s__	69.88	88.38	3.7	0	4658805	720	303	348	22664	19856	15375	13385	150094	77693	65.5	1.57	88.58	4116
		GCA_009837805.1_ASM983780v1	Ircinia ramosa	No	Yes	No	d__Bacteria;p__Chloroflexota;c__Anaerolineae;o__Caldilineales;f__Caldilineaceae;g__Bin5;s__	92.46	93.36	0.18	0	5028561	1010	387	479	19001	15177	12993	10495	75923	75923	60.3	2.4	88.49	4548
		GCA_009837815.1_ASM983781v1	Ircinia ramosa	No	Yes	No	d__Bacteria;p__Actinobacteriota;c__Acidimicrobiia;o__UBA5794;f__Bin76;g__Bin76;s__	87.62	94.02	1.28	0	2343800	3153	156	194	21508	19055	15024	12065	75502	75502	64.4	1.95	91.09	2263
		GCA_009837885.1_ASM983788v1	Ircinia ramosa	No	Yes	No	d__Bacteria;p__Acidobacteriota;c__Thermoanaerobaculia;o__UBA5704;f__;g__;s__	86.32	94.87	1.71	0	4556516	1270	47	66	151187	144954	96947	69018	607317	317239	68.4	2.29	93.73	3715
		GCA_009837925.1_ASM983792v1	Ircinia ramosa	No	Yes	No	d__Bacteria;p__Dadabacteria;c__UBA1144;o__;f__;g__;s__	88.19	96.59	1.68	0	1633211	300	24	27	186370	186370	68050	60478	298409	293750	51	4.77	91.35	1517
		GCA_009838075.1_ASM983807v1	Ircinia ramosa	No	Yes	No	d__Bacteria;p__Proteobacteria;c__Alphaproteobacteria;o__Rhodobacterales;f__Rhodobacteraceae;g__Silicimonas;s__	84.26	94.16	1.98	10	4798335	310	124	137	69183	60101	38696	35022	188837	188837	63.2	2.3	86.69	4553
		GCA_009838175.1_ASM983817v1	Ircinia ramosa	No	Yes	No	d__Bacteria;p__Chloroflexota;c__Dehalococcoidia;o__UBA1151;f__Bin127;g__Bin127;s__	90.26	95.21	0.99	0	2635461	220	66	70	66728	59655	39931	37646	164021	164021	56.3	1.66	90.14	2341
		GCA_009838195.1_ASM983819v1	Ircinia ramosa	No	Yes	No	d__Bacteria;p__Bacteroidota;c__Rhodothermia;o__Rhodothermales;f__Bin80;g__Bin80;s__	93.25	96.05	0.56	0	3004149	140	48	53	156314	131581	62586	56679	331847	274114	50.6	1.95	90.67	2471
		GCA_009838215.1_ASM983821v1	Ircinia ramosa	No	Yes	No	d__Bacteria;p__Proteobacteria;c__Alphaproteobacteria;o__Bin65;f__Bin65;g__Bin65;s__	96.98	99.13	0.43	0	4717013	270	125	143	72072	62283	37736	32984	227177	227177	67	2.71	88.32	4345
		GCA_009838445.1_ASM983844v1	Ircinia ramosa	No	Yes	No	d__Bacteria;p__Chloroflexota;c__Dehalococcoidia;o__SAR202;f__;g__;s__	85.8	91.75	1.19	50	3306247	640	315	370	13853	12133	10496	8934	51922	51922	61	1.68	87.54	3115
		GCA_009838465.1_ASM983846v1	Ircinia ramosa	No	Yes	No	d__Bacteria;p__Chloroflexota;c__Dehalococcoidia;o__SAR202;f__UBA11138;g__;s__	89.77	94.72	0.99	0	3550737	960	75	90	74956	59068	47343	39441	388719	344128	58.3	1.37	86.59	3282
		GCA_009838515.1_ASM983851v1	Ircinia ramosa	No	Yes	No	d__Bacteria;p__Acidobacteriota;c__Acidobacteriae;o__Bryobacterales;f__UBA6623;g__;s__	78.84	95.94	3.42	0	5841024	570	99	138	117997	84293	59000	42322	310984	310984	63.6	2.02	88.94	4654
		GCA_009838525.1_ASM983852v1	Ircinia ramosa	No	Yes	No	d__Bacteria;p__Acidobacteriota;c__Vicinamibacteria;o__Vicinamibacterales;f__UBA8438;g__;s__	84.21	97.01	2.56	0	4292814	280	38	48	272868	206137	112968	89427	885768	455249	67.4	6.66	93.38	3724
		GCA_009838625.1_ASM983862v1	Ircinia ramosa	No	Yes	No	d__Bacteria;p__Chloroflexota;c__Anaerolineae;o__Caldilineales;f__Caldilineaceae;g__Bin5;s__	96.36	96.36	0	0	5353615	630	188	215	48595	45467	28476	24897	127299	98266	59.4	2.19	86.73	4547
		GCA_009838635.1_ASM983863v1	Ircinia ramosa	No	Yes	No	d__Bacteria;p__Actinobacteriota;c__Acidimicrobiia;o__UBA5794;f__SZUA-232;g__;s__	88.9	95.3	1.28	0	2889529	790	171	214	27809	20787	16897	13498	82243	78653	66.9	1.84	90.21	2744
		GCA_009838785.1_ASM983878v1	Ircinia ramosa	No	Yes	No	d__Bacteria;p__Acidobacteriota;c__Thermoanaerobaculia;o__UBA5704;f__;g__;s__	86.32	94.87	1.71	0	4326598	450	18	27	457464	257739	240366	160227	929637	778928	68.3	0.57	94.63	3547
		GCA_009838805.1_ASM983880v1	Ircinia ramosa	No	Yes	No	d__Bacteria;p__Poribacteria;c__WGA-4E;o__WGA-4E;f__WGA-3G;g__WGA-3G;s__	77.84	94.34	3.3	0	5584956	1676	507	551	14204	13406	11015	10132	45280	45280	47.6	2.02	88.29	4955
		GCA_009838875.1_ASM983887v1	Ircinia ramosa	No	Yes	No	d__Bacteria;p__Actinobacteriota;c__Acidimicrobiia;o__Microtrichales;f__Bin134;g__Bin134;s__	88.47	94.87	1.28	0	3603314	860	45	68	127835	88793	80073	52977	378754	330719	64.7	1.51	94.07	3373
		GCA_009838965.1_ASM983896v1	Ircinia ramosa	No	Yes	No	d__Bacteria;p__Chloroflexota;c__Dehalococcoidia;o__UBA2963;f__UBA2963;g__Bin16;s__	91.75	96.7	0.99	0	3013978	770	106	138	47841	42160	28433	21834	170345	170345	65.9	1.81	89.7	2889
		GCA_009838975.1_ASM983897v1	Ircinia ramosa	No	Yes	No	d__Bacteria;p__Gemmatimonadota;c__Gemmatimonadetes;o__SG8-23;f__UBA6960;g__Bin94;s__	68.15	95.6	5.49	0	4507204	260	162	170	52062	49493	27822	26511	204548	148454	67.3	1.9	92.56	3793
		GCA_009839295.1_ASM983929v1	Ircinia ramosa	No	Yes	No	d__Bacteria;p__Chloroflexota;c__Anaerolineae;o__Caldilineales;f__Bin34;g__Bin34;s__	93.64	93.64	0	0	4227761	920	122	151	52611	43939	34653	27992	304551	304551	62.1	1.6	86.81	3611
		GCA_009839325.1_ASM983932v1	Ircinia ramosa	No	Yes	No	d__Bacteria;p__Proteobacteria;c__Alphaproteobacteria;o__UBA7887;f__;g__;s__	89.19	91.04	0.37	0	2732159	6800	111	188	58958	28042	24614	14496	169611	96617	65.4	1.8	86.3	2623
		GCA_009839465.1_ASM983946v1	Ircinia ramosa	No	Yes	No	d__Bacteria;p__Proteobacteria;c__Gammaproteobacteria;o__Pseudomonadales;f__HTCC2089;g__;s__	46.76	85.11	7.67	0	5252025	2060	549	710	13334	11388	9566	7394	63215	43374	68.7	1.81	92.04	5150
		GCA_009839505.1_ASM983950v1	Ircinia ramosa	No	Yes	No	d__Bacteria;p__Proteobacteria;c__Gammaproteobacteria;o__Pseudomonadales;f__HTCC2089;g__;s__	73.23	85.03	2.36	0	4699526	957	181	221	42768	33224	25964	21260	165904	165904	65.2	1.3	90.52	4081
		GCA_009839615.1_ASM983961v1	Ircinia ramosa	No	Yes	No	d__Bacteria;p__UBA8248;c__UBA8248;o__UBA8248;f__UBA8248;g__Bin107;s__	89.83	94.08	0.85	0	3572023	710	280	324	18220	15733	12757	11022	77790	77790	61.1	3.2	87.24	3413
		GCA_009839635.1_ASM983963v1	Ircinia ramosa	No	Yes	Yes	d__Bacteria;p__Proteobacteria;c__Gammaproteobacteria;o__UBA4575;f__UBA4575;g__;s__	78.51	85.41	1.38	12.5	1686791	260	156	182	17840	14575	10812	9266	41328	41328	56.5	3.76	90.66	1702
		GCA_009839725.1_ASM983972v1	Ircinia ramosa	No	Yes	Yes	d__Bacteria;p__Chloroflexota;c__Dehalococcoidia;o__UBA2991;f__UBA2991;g__UBA2991;s__	94.72	94.72	0	0	2834774	630	160	169	25672	23816	17717	16770	188484	147530	68.9	1.71	91.91	2913
		GCA_009839745.1_ASM983974v1	Ircinia ramosa	No	Yes	No	d__Bacteria;p__Poribacteria;c__WGA-4E;o__WGA-4E;f__WGA-3G;g__WGA-3G;s__	73.44	95.44	4.4	0	5039918	670	141	163	55191	46227	35744	30915	210660	210660	48.2	1.5	87.78	4437
		GCA_009839925.1_ASM983992v1	Ircinia ramosa	No	Yes	No	d__Bacteria;p__Chloroflexota;c__Dehalococcoidia;o__UBA2979;f__;g__;s__	91.03	91.58	0.11	100	2857508	580	214	245	20223	19031	13352	11660	127824	94281	71.1	1.5	91.09	2851
		GCA_009839975.1_ASM983997v1	Ircinia ramosa	No	Yes	No	d__Bacteria;p__Poribacteria;c__WGA-4E;o__WGA-4E;f__WGA-3G;g__;s__	88.84	94.34	1.1	0	4779924	1200	454	493	14992	14314	10528	9693	64313	64313	42	1.58	89.89	4033
		GCA_009840005.1_ASM984000v1	Ircinia ramosa	No	Yes	No	d__Bacteria;p__Latescibacterota;c__UBA2968;o__UBA8231;f__GCA-002724215;g__GCA-2724215;s__	74.19	97.19	4.6	0	6540678	864	114	142	83283	72162	57374	46055	242989	188502	58.6	1.24	92.36	5652
		GCA_009840025.1_ASM984002v1	Ircinia ramosa	No	Yes	No	d__Bacteria;p__Chloroflexota;c__Dehalococcoidia;o__SAR202;f__;g__;s__	89.77	94.72	0.99	0	3365586	886	145	175	40117	32820	23210	19226	137892	121053	60.6	2.26	86.87	3073
		GCA_009840105.1_ASM984010v1	Ircinia ramosa	No	Yes	No	d__Bacteria;p__Actinobacteriota;c__Acidimicrobiia;o__Microtrichales;f__Bin134;g__Bin134;s__	88.47	94.87	1.28	0	3454628	630	42	60	131233	95034	82253	57566	273939	199230	64.7	1.51	93.93	3231
		GCA_009840135.1_ASM984013v1	Ircinia ramosa	No	Yes	No	d__Bacteria;p__Chloroflexota;c__Dehalococcoidia;o__UBA3495;f__UBA3495;g__Bin22;s__	90.92	95.87	0.99	0	3454762	929	190	237	30204	21252	18182	14573	94201	94201	59.2	1.58	82.9	3218
		GCA_009840165.1_ASM984016v1	Ircinia ramosa	No	Yes	No	d__Bacteria;p__Chloroflexota;c__Dehalococcoidia;o__UBA3495;f__UBA3495;g__Bin87;s__	94.72	94.72	0	0	3757816	370	115	143	58363	50357	32676	26275	229753	199817	61.3	2.17	88.62	3886
		GCA_009840175.1_ASM984017v1	Ircinia ramosa	No	Yes	No	d__Bacteria;p__Chloroflexota;c__Dehalococcoidia;o__UBA3495;f__UBA3495;g__;s__	92.74	97.69	0.99	100	4312190	740	268	306	23816	21113	16090	14089	77312	77312	61.8	2.55	85.72	4297
		GCA_009840215.1_ASM984021v1	Ircinia ramosa	No	Yes	No	d__Bacteria;p__Gemmatimonadota;c__Gemmatimonadetes;o__SG8-23;f__UBA6960;g__Bin94;s__	79.65	96.15	3.3	0	4085139	410	370	384	15539	15317	11040	10637	99235	99235	67.4	1.94	90.66	3610
		GCA_009840225.1_ASM984022v1	Ircinia ramosa	No	Yes	No	d__Bacteria;p__Chloroflexota;c__Anaerolineae;o__Caldilineales;f__Caldilineaceae;g__Bin5;s__	93.18	97.73	0.91	100	5602616	920	396	425	19458	17117	14148	13180	75429	75429	59.9	2.16	85.16	4648
		GCA_009840285.1_ASM984028v1	Ircinia ramosa	No	Yes	Yes	d__Bacteria;p__Nitrospirota;c__Nitrospiria;o__Nitrospirales;f__UBA8639;g__Bin75;s__	76.15	95.45	3.86	20	2201017	240	113	119	27767	27767	19478	18493	78911	78911	57.1	2.21	88.72	2165
		GCA_009840315.1_ASM984031v1	Ircinia ramosa	No	Yes	Yes	d__Bacteria;p__Chloroflexota;c__Dehalococcoidia;o__Bin125;f__Bin125;g__Bin125;s__	87.68	92.63	0.99	0	2916832	5630	177	236	27845	22385	16479	12335	117940	90906	64.2	1.25	90.5	2844
		GCA_009840355.1_ASM984035v1	Ircinia ramosa	No	Yes	No	d__Bacteria;p__Chloroflexota;c__Dehalococcoidia;o__SAR202;f__UBA11138;g__Bin90;s__	89.99	97.69	1.54	0	3278736	340	57	64	106960	99658	57521	51224	252471	252471	58	1.75	85.46	3099
		GCA_009840385.1_ASM984038v1	Ircinia ramosa	No	Yes	No	d__Bacteria;p__Dadabacteria;c__UBA1144;o__;f__;g__;s__	88.19	96.59	1.68	0	1655437	20	14	16	215172	215172	118245	103463	735220	735220	50.5	2.24	90.89	1563
		GCA_009840445.1_ASM984044v1	Ircinia ramosa	No	Yes	No	d__Bacteria;p__Cyanobacteria;c__Cyanobacteriia;o__Synechococcales;f__Cyanobiaceae;g__Synechococcus_B;s__	92.91	97.01	0.82	75	2164299	140	85	90	39555	36512	25462	24046	99876	99876	62.1	2.54	90.62	2168
		GCA_009840525.1_ASM984052v1	Ircinia ramosa	No	Yes	No	d__Bacteria;p__Gemmatimonadota;c__Gemmatimonadetes;o__SG8-23;f__UBA6960;g__BD2-11;s__	81.3	97.8	3.3	0	3992735	370	155	165	42866	40555	25759	24196	125251	125251	68.1	2.17	92.12	3410
		GCA_009840555.1_ASM984055v1	Ircinia ramosa	No	Yes	No	d__Bacteria;p__Chloroflexota_B;c__UBA11872;o__UBA11872;f__;g__;s__	93.21	93.21	0	0	2267222	70	35	42	176326	176326	64777	53979	550550	290834	64.6	8.46	89.96	2005
		GCA_009840575.1_ASM984057v1	Ircinia ramosa	No	Yes	No	d__Bacteria;p__Chloroflexota;c__Anaerolineae;o__SBR1031;f__A4b;g__UBA6055;s__	87.27	91.82	0.91	0	3457751	1100	190	210	29445	26507	18198	16460	80594	80594	59.9	1.43	91.83	3097
		GCA_009840635.1_ASM984063v1	Ircinia ramosa	No	Yes	No	d__Bacteria;p__Acidobacteriota;c__Bin61;o__Bin61;f__Bin61;g__Bin61;s__	89.34	93.59	0.85	0	3584940	290	110	121	55742	55421	32590	29625	137713	129825	69.2	2.89	90.97	2994
		GCA_009840735.1_ASM984073v1	Ircinia ramosa	No	Yes	Yes	d__Bacteria;p__Actinobacteriota;c__Acidimicrobiia;o__Microtrichales;f__Bin134;g__;s__	79.07	85.47	1.28	0	2719572	3180	126	165	39307	33554	21583	16462	146530	114545	70.2	1.97	90.93	2490
		GCA_009840825.1_ASM984082v1	Ircinia ramosa	No	Yes	No	d__Bacteria;p__Dadabacteria;c__UBA1144;o__;f__;g__;s__	92.39	96.59	0.84	0	1800050	100	24	25	122994	122994	75002	71998	519899	519899	50.4	2.42	90.88	1671
		GCA_009840945.1_ASM984094v1	Ircinia ramosa	No	Yes	No	d__Bacteria;p__Chloroflexota;c__Dehalococcoidia;o__UBA2979;f__;g__;s__	90.92	90.92	0	0	2530627	480	136	157	31078	26090	18607	16115	96172	71236	71	1.64	89.89	2457
		GCA_009840965.1_ASM984096v1	Ircinia ramosa	No	Yes	No	d__Bacteria;p__Chloroflexota;c__Dehalococcoidia;o__UBA2979;f__;g__;s__	81.19	86.69	1.1	0	2690422	1470	296	371	12559	10226	9089	7247	46441	46441	71.6	1.64	91.52	2789
		GCA_009841005.1_ASM984100v1	Ircinia ramosa	No	Yes	No	d__Bacteria;p__Gemmatimonadota;c__Gemmatimonadetes;o__;f__;g__;s__	77.71	94.51	3.36	0	3163883	70	158	165	32485	31620	20024	19174	111235	83809	69	1.33	93.63	2796
		GCA_009841015.1_ASM984101v1	Ircinia ramosa	No	Yes	No	d__Bacteria;p__Gemmatimonadota;c__Gemmatimonadetes;o__;f__;g__;s__	79.04	95.54	3.3	0	3760526	380	219	230	27076	24852	17171	16348	77618	77618	69.1	1.72	92.82	3381
		GCA_009841045.1_ASM984104v1	Ircinia ramosa	No	Yes	No	d__Bacteria;p__Chloroflexota;c__Dehalococcoidia;o__UBA6926;f__UBA6926;g__;s__	93.73	93.73	0	0	1952380	170	63	71	44851	42517	30990	27495	140347	140347	60.5	1.63	91.03	1838
		GCA_009841055.1_ASM984105v1	Ircinia ramosa	No	Yes	No	d__Bacteria;p__Acidobacteriota;c__Acidobacteriae;o__;f__;g__;s__	88.27	93.42	1.03	0	4321718	440	374	400	15676	14914	11555	10803	63693	55327	62.3	1.95	88.03	3598
		GCA_009841075.1_ASM984107v1	Ircinia ramosa	No	Yes	No	d__Bacteria;p__Actinobacteriota;c__Acidimicrobiia;o__UBA5794;f__SZUA-232;g__;s__	86.34	92.74	1.28	0	2304581	1742	90	108	45026	44309	25606	21322	99394	99394	60.8	1.61	91.64	2105
		GCA_009841105.1_ASM984110v1	Ircinia ramosa	No	Yes	No	d__Bacteria;p__Actinobacteriota;c__Acidimicrobiia;o__UBA5794;f__SZUA-232;g__;s__	88.9	95.3	1.28	0	3050210	470	69	80	69704	64584	44205	38121	215702	215702	66.1	1.17	89.92	2843
		GCA_009841145.1_ASM984114v1	Ircinia ramosa	No	Yes	No	d__Bacteria;p__Chloroflexota;c__Anaerolineae;o__Caldilineales;f__Bin34;g__Bin34;s__	94.55	94.55	0	0	4342617	680	102	116	81712	74239	42574	37430	189751	189751	62	1.41	86.71	3737
		GCA_009841165.1_ASM984116v1	Ircinia ramosa	No	Yes	No	d__Bacteria;p__Gemmatimonadota;c__Gemmatimonadetes;o__SG8-23;f__UBA6960;g__Bin94;s__	74.7	96.7	4.4	0	4271398	370	239	249	27356	26356	17871	17152	82083	82083	67.3	1.78	92.99	3637
		GCA_009841225.1_ASM984122v1	Ircinia ramosa	No	Yes	No	d__Bacteria;p__Acidobacteriota;c__Acidobacteriae;o__Bryobacterales;f__UBA6623;g__;s__	84.42	97.22	2.56	0	5743471	380	58	69	247883	223041	99025	83233	436764	436764	63.6	1.72	89.4	4523
		GCA_009841235.1_ASM984123v1	Ircinia ramosa	No	Yes	No	d__Bacteria;p__Chloroflexota;c__Anaerolineae;o__Caldilineales;f__Caldilineaceae;g__Bin5;s__	96.36	96.36	0	0	5198435	690	122	137	65090	57341	42610	37939	241547	241547	60.4	1.84	88.22	4421
		GCA_009841255.1_ASM984125v1	Ircinia ramosa	No	Yes	No	d__Bacteria;p__Poribacteria;c__WGA-4E;o__WGA-4E;f__WGA-3G;g__WGA-3G;s__	58.09	96.54	7.69	25	5730401	940	87	127	105772	85603	65866	45113	385559	243912	48.3	2.11	87.99	4915
		GCA_009841265.1_ASM984126v1	Ircinia ramosa	No	Yes	No	d__Bacteria;p__Latescibacterota;c__;o__;f__;g__;s__	97.74	97.74	0	0	3742153	246	14	18	763332	763332	267296	207883	1814460	1412115	62.3	4.94	91.71	3147
		GCA_009841325.1_ASM984132v1	Ircinia ramosa	No	Yes	No	d__Bacteria;p__Actinobacteriota;c__Acidimicrobiia;o__Microtrichales;f__UBA11606;g__UBA11606;s__	89.33	95.73	1.28	0	3405915	1100	69	98	137040	80433	49361	34743	478501	256879	61.1	2.52	93.36	3177
		GCA_009841335.1_ASM984133v1	Ircinia ramosa	No	Yes	No	d__Bacteria;p__Bacteroidota;c__Rhodothermia;o__Rhodothermales;f__Bin80;g__Bin80;s__	92.68	95.48	0.56	0	3489814	750	121	142	54291	50079	28841	24570	162476	162476	51.5	2.33	89.05	2872
		GCA_009841405.1_ASM984140v1	Ircinia ramosa	No	Yes	No	d__Bacteria;p__Chloroflexota;c__Anaerolineae;o__SBR1031;f__A4b;g__UBA6055;s__	86.36	90.91	0.91	0	4237473	700	173	198	39914	35967	24494	21397	197687	170291	61.2	1.59	90.04	3665
		GCA_009841435.1_ASM984143v1	Ircinia ramosa	No	Yes	No	d__Bacteria;p__Chloroflexota;c__Dehalococcoidia;o__UBA2991;f__UBA2991;g__UBA2991;s__	90.36	95.31	0.99	0	2708205	200	127	138	32969	32892	21324	19623	159830	159830	68.6	1.29	92.4	2782
		GCA_009841475.1_ASM984147v1	Ircinia ramosa	No	Yes	No	d__Bacteria;p__Gemmatimonadota;c__Gemmatimonadetes;o__SG8-23;f__UBA6960;g__Bin94;s__	81.3	97.8	3.3	0	4178274	240	369	375	15642	15270	11323	11141	56928	56928	67.8	2.02	91.41	3782
		GCA_009841545.1_ASM984154v1	Ircinia ramosa	No	Yes	Yes	d__Bacteria;p__Chloroflexota;c__Dehalococcoidia;o__Bin125;f__Bin125;g__Bin125;s__	86.8	91.75	0.99	0	2975573	80	59	67	93950	93950	50433	44410	252865	179466	64.1	3	91.65	2771
		GCA_009841605.1_ASM984160v1	Ircinia ramosa	No	Yes	No	d__Bacteria;p__Chloroflexota;c__Dehalococcoidia;o__SAR202;f__;g__;s__	91.75	96.7	0.99	100	3226973	250	143	159	41279	35982	22566	20293	112651	112651	60.7	2.82	86.9	2922
		GCA_009841665.1_ASM984166v1	Ircinia ramosa	No	Yes	No	d__Bacteria;p__Latescibacterota;c__UBA2968;o__UBA2968;f__;g__;s__	95.2	96.7	0.3	0	5748128	3260	199	237	51891	42219	28885	24239	193212	193212	51	2.04	92.58	5133
		GCA_009841725.1_ASM984172v1	Ircinia ramosa	No	Yes	No	d__Bacteria;p__Proteobacteria;c__Gammaproteobacteria;o__UBA10353;f__LS-SOB;g__;s__	91.31	94.36	0.61	0	2611800	890	168	248	21694	16725	15546	10527	104083	104083	59.6	2.36	89.5	2469
		GCA_009842195.1_ASM984219v1	Ircinia ramosa	No	Yes	No	d__Bacteria;p__Bacteroidota;c__Rhodothermia;o__Rhodothermales;f__Bin80;g__Bin80;s__	86.35	92	1.13	0	3212718	776	281	350	16500	13422	11433	9176	45437	45437	51.4	1.54	88.93	2813
		GCA_009842315.1_ASM984231v1	Ircinia ramosa	No	Yes	No	d__Bacteria;p__Actinobacteriota;c__Acidimicrobiia;o__Microtrichales;f__UBA11606;g__;s__	85.05	91.45	1.28	0	3864360	640	59	78	129538	127804	65497	49534	364925	230463	69	2.26	92.56	3546
		GCA_009842405.1_ASM984240v1	Ircinia ramosa	No	Yes	Yes	d__Bacteria;p__Chloroflexota;c__Dehalococcoidia;o__Bin125;f__Bin125;g__Bin125;s__	88.23	93.73	1.1	50	2751461	630	132	195	32989	21227	20844	14106	107498	68230	65.4	1.41	91.97	2645
		GCA_009842505.1_ASM984250v1	Ircinia ramosa	No	Yes	Yes	d__Bacteria;p__Proteobacteria;c__Gammaproteobacteria;o__UBA10353;f__LS-SOB;g__;s__	94.82	97.87	0.61	0	3731799	250	157	164	40152	40017	23769	22753	100233	100233	62.4	2.67	87.58	3457
		GCA_009842675.1_ASM984267v1	Ircinia ramosa	No	Yes	No	d__Bacteria;p__Actinobacteriota;c__Acidimicrobiia;o__Microtrichales;f__Bin134;g__Bin134;s__	88.47	94.87	1.28	0	3385502	1114	81	101	67345	54254	41796	33508	185683	185683	64.7	1.77	94.13	3189
		GCA_009843015.1_ASM984301v1	Ircinia ramosa	No	Yes	No	d__Bacteria;p__Gemmatimonadota;c__Gemmatimonadetes;o__SG8-23;f__UBA6960;g__BD2-11;s__	81.3	97.8	3.3	0	3397634	1058	314	400	14130	12113	10820	8491	66877	66877	68.3	1.48	93	3025
		GCA_009843505.1_ASM984350v1	Ircinia ramosa	No	Yes	No	d__Bacteria;p__Acidobacteriota;c__Thermoanaerobaculia;o__UBA5704;f__;g__;s__	85.89	94.44	1.71	0	4522615	660	50	62	183213	169710	90452	72934	795955	795955	68.3	3.25	94.3	3762
		GCA_009843525.1_ASM984352v1	Ircinia ramosa	No	Yes	No	d__Bacteria;p__Actinobacteriota;c__Acidimicrobiia;o__Microtrichales;f__TK06;g__;s__	86.74	97.44	2.14	0	3338356	610	43	53	181100	134874	77636	62976	265020	265020	67.3	3.5	92.83	2994
		GCA_009843665.1_ASM984366v1	Ircinia ramosa	No	Yes	No	d__Bacteria;p__Chloroflexota;c__Anaerolineae;o__Caldilineales;f__Caldilineaceae;g__Bin5;s__	80.85	85.4	0.91	0	4564648	3272	729	1037	7210	5727	6261	4398	55541	41376	59.6	2.34	86.27	4467
		GCA_009843735.1_ASM984373v1	Ircinia ramosa	No	Yes	No	d__Bacteria;p__Actinobacteriota;c__Acidimicrobiia;o__Microtrichales;f__UBA11606;g__;s__	76.1	86.8	2.14	33.33	3428838	670	140	153	38991	37914	24491	22406	143457	100127	69.6	1.4	93.72	3237
		GCA_009843785.1_ASM984378v1	Ircinia ramosa	No	Yes	No	d__Bacteria;p__Poribacteria;c__WGA-4E;o__WGA-4E;f__WGA-3G;g__WGA-3G;s__	69.48	97.58	5.62	0	6170731	4059	391	476	22403	18982	15781	12955	71838	70932	47.6	1.9	88.37	5346
		GCA_009843865.1_ASM984386v1	Ircinia ramosa	No	Yes	No	d__Bacteria;p__Actinobacteriota;c__Acidimicrobiia;o__Microtrichales;f__Bin134;g__Bin134;s__	88.47	94.87	1.28	0	1785529	440	43	51	74480	60584	41523	35001	221659	221659	53.7	2.3	92.53	1699
		GCA_009843885.1_ASM984388v1	Ircinia ramosa	No	Yes	No	d__Bacteria;p__Acidobacteriota;c__Vicinamibacteria;o__Vicinamibacterales;f__UBA8438;g__;s__	86.61	96.01	1.88	0	5874546	2152	286	432	31531	21556	20540	13593	95835	81658	69.5	1.91	90.37	5293
		GCA_009843915.1_ASM984391v1	Ircinia ramosa	No	Yes	No	d__Bacteria;p__Actinobacteriota;c__Acidimicrobiia;o__Microtrichales;f__UBA11606;g__;s__	78.64	85.04	1.28	0	3240544	500	151	165	39823	39823	21460	19636	137256	129395	69	2.12	93.57	3108
		GCA_009844085.1_ASM984408v1	Ircinia ramosa	No	Yes	Yes	d__Bacteria;p__Proteobacteria;c__Gammaproteobacteria;o__Pseudomonadales;f__Pseudohongiellaceae;g__UBA9145;s__	90.81	90.86	0.01	0	3434248	360	77	86	88854	77989	44600	39928	340630	308328	60.7	3.8	93.42	2954
		GCA_009844535.1_ASM984453v1	Ircinia ramosa	No	Yes	No	d__Bacteria;p__Latescibacterota;c__UBA2968;o__UBA8231;f__GCA-002724215;g__GCA-2724215;s__	78.06	87.31	1.85	0	4864705	1620	666	810	8588	7582	7304	6003	36592	36592	59.4	2.14	93.74	4669
		GCA_009844885.1_ASM984488v1	Ircinia ramosa	No	Yes	No	d__Bacteria;p__Gemmatimonadota;c__Gemmatimonadetes;o__SG8-23;f__UBA6960;g__Bin94;s__	75.26	94.51	3.85	0	4895221	490	395	417	17461	17079	12392	11737	99715	99715	66.9	2.86	91.33	4345
		GCA_009845505.1_ASM984550v1	Ircinia ramosa	No	Yes	No	d__Bacteria;p__Poribacteria;c__WGA-4E;o__WGA-4E;f__WGA-3G;g__WGA-3G;s__	58.88	87.28	5.68	0	4776395	1870	691	779	8225	7567	6912	6129	28522	28522	48.2	1.78	90.35	4409
		GCA_009845765.1_ASM984576v1	Ircinia ramosa	No	Yes	No	d__Bacteria;p__Latescibacterota;c__;o__;f__;g__;s__	97.74	97.74	0	0	3790922	1140	41	56	167108	155333	92461	67674	398240	269342	62.3	1.09	91.12	3225
		GCA_009845855.1_ASM984585v1	Ircinia ramosa	No	Yes	No	d__Bacteria;p__Gemmatimonadota;c__Gemmatimonadetes;o__;f__;g__;s__	79.1	95.6	3.3	0	3657233	460	120	139	56475	50468	30476	26307	158800	158800	68.8	5.18	92.73	3137
		GCA_009845885.1_ASM984588v1	Ircinia ramosa	No	Yes	Yes	d__Bacteria;p__Chloroflexota;c__Dehalococcoidia;o__Bin125;f__Bin125;g__Bin125;s__	88.78	93.73	0.99	0	2805406	310	117	139	37184	31873	23977	20180	103319	102944	64.2	1.09	92.16	2704
		GCA_009846005.1_ASM984600v1	Ircinia ramosa	No	Yes	No	d__Bacteria;p__Proteobacteria;c__Gammaproteobacteria;o__Pseudomonadales;f__HTCC2089;g__;s__	70.15	85.8	3.13	16.67	4959962	1230	106	130	102173	88380	46792	38144	408373	335427	64.9	1.52	91.57	4244
Alphaproteobacteria bacterium	JAJDXF000000000	jk18x27bins.11	Ircinia vansoesti	No	Yes	Yes	d__Bacteria;p__Proteobacteria;c__Alphaproteobacteria;o__Bin65;f__Bin65;g__Bin65;s__	94.56	98.91	0.87	0	4025868	0	103	103	58698	58698	39086	39086	211194	211194	67.5	1.67	88.21	3775
Gemmatimonadetes bacterium	JAJDXG000000000	jk18x27bins.12	Ircinia vansoesti	Yes	Yes	No	d__Bacteria;p__Gemmatimonadota;c__Gemmatimonadetes;o__SG8-23;f__UBA6960;g__BD2-11;s__	82.4	98.9	3.3	0	3817048	0	63	63	93751	93751	60588	60588	445961	445961	68.3	1.13	92.19	3149
Gammaproteobacteria bacterium	JAJDXH000000000	jk18x27bins.16	Ircinia vansoesti	No	Yes	Yes	d__Bacteria;p__Proteobacteria;c__Gammaproteobacteria;o__UBA10353;f__LS-SOB;g__;s__	88.72	91.77	0.61	0	3564871	0	84	84	63390	63390	42438	42438	226712	226712	62.8	1.71	87.93	3304
Dehalococcoidia bacterium	JAJDXI000000000	jk18x27bins.2	Ircinia vansoesti	Yes	Yes	No	d__Bacteria;p__Chloroflexota;c__Dehalococcoidia;o__UBA1151;f__Bin127;g__Bin127;s__	76.64	87.79	2.23	33.33	2308614	0	176	176	16139	16139	13117	13117	53269	53269	56.2	1.09	90.56	2239
Acidimicrobiia bacterium	JAJDXJ000000000	jk18x27bins.21	Ircinia vansoesti	Yes	Yes	No	d__Bacteria;p__Actinobacteriota;c__Acidimicrobiia;o__Microtrichales;f__TK06;g__;s__	74.77	94.02	3.85	20	2885958	0	273	273	16404	16404	10571	10571	66998	66998	67.7	1.5	92.65	2854
Alphaproteobacteria bacterium	JAJDXK000000000	jk18x27bins.25	Ircinia vansoesti	Yes	Yes	Yes	d__Bacteria;p__Proteobacteria;c__Alphaproteobacteria;o__UBA828;f__UBA828;g__;s__	77.83	91.53	2.74	12.5	3793995	0	157	157	41680	41680	24165	24165	217345	217345	70.5	1.76	91.61	3593
Gammaproteobacteria bacterium	JAJDXL000000000	jk18x27bins.27	Ircinia vansoesti	No	Yes	Yes	d__Bacteria;p__Proteobacteria;c__Gammaproteobacteria;o__UBA6522;f__UBA6522;g__FEN-1219;s__	71.1	86.95	3.17	0	3879563	0	40	40	147442	147442	96989	96989	323432	323432	64.7	1.27	89.6	3375
Gemmatimonadetes bacterium	JAJDXM000000000	jk18x27bins.35	Ircinia vansoesti	Yes	Yes	No	d__Bacteria;p__Gemmatimonadota;c__Gemmatimonadetes;o__SG8-23;f__UBA6960;g__Bin94;s__	82.4	98.9	3.3	0	4188171	0	97	97	78964	78964	43177	43177	301318	301318	67.8	2	91.45	3646
Bryobacterales bacterium	JAJDXN000000000	jk18x27bins.36	Ircinia vansoesti	No	Yes	No	d__Bacteria;p__Acidobacteriota;c__Acidobacteriae;o__Bryobacterales;f__UBA6623;g__;s__	53.57	85.47	6.38	0	5267836	0	822	822	7647	7647	6408	6408	39293	39293	64.4	1.65	87.93	4963
Rhodospirillales bacterium	JAJDXO000000000	jk18x27bins.37	Ircinia vansoesti	Yes	Yes	Yes	d__Bacteria;p__Proteobacteria;c__Alphaproteobacteria;o__Rhodospirillales_A;f__;g__;s__	93.02	95.52	0.5	0	3775704	0	60	60	110420	110420	62928	62928	289761	289761	63.1	1.52	90.21	3545
Alphaproteobacteria bacterium	JAJDXP000000000	jk18x27bins.38	Ircinia vansoesti	No	Yes	No	d__Bacteria;p__Proteobacteria;c__Alphaproteobacteria;o__UBA7887;f__;g__;s__	79.14	87.84	1.74	20	3292821	0	179	179	40495	40495	18395	18395	123061	123061	65.2	1.54	86.18	3211
Caldilineaceae bacterium	JAJDXQ000000000	jk18x27bins.44	Ircinia vansoesti	Yes	Yes	No	d__Bacteria;p__Chloroflexota;c__Anaerolineae;o__Caldilineales;f__Caldilineaceae;g__Bin5;s__	89.54	98.64	1.82	50	5173183	0	46	46	179701	179701	112460	112460	429395	429395	60.7	1.04	86.62	4321
Anaerolineae bacterium	JAJDXR000000000	jk18x27bins.46	Ircinia vansoesti	Yes	Yes	No	d__Bacteria;p__Chloroflexota;c__Anaerolineae;o__SBR1031;f__A4b;g__UBA6055;s__	87.27	91.82	0.91	0	4106269	0	94	94	74640	74640	43683	43683	291705	291705	59.5	1.46	89.36	3621
Gemmatimonadetes bacterium	JAJDXS000000000	jk18x27bins.47	Ircinia vansoesti	Yes	Yes	No	d__Bacteria;p__Gemmatimonadota;c__Gemmatimonadetes;o__SG8-23;f__UBA6960;g__Bin94;s__	72.51	94.51	4.4	0	4490311	0	83	83	139028	139028	54100	54100	266866	266866	67.4	1.66	92.06	3779
Candidatus Poribacteria bacterium	JAJDXT000000000	jk18x27bins.49	Ircinia vansoesti	No	Yes	No	d__Bacteria;p__Poribacteria;c__WGA-4E;o__WGA-4E;f__WGA-3G;g__;s__	70.62	87.47	3.37	0	4341921	0	200	200	32093	32093	21709	21709	107280	107280	40.3	1.32	86.58	3695
Dehalococcoidia bacterium	JAJDXU000000000	jk18x27bins.51	Ircinia vansoesti	Yes	Yes	No	d__Bacteria;p__Chloroflexota;c__Dehalococcoidia;o__UBA3495;f__UBA3495;g__Bin87;s__	83.28	88.23	0.99	0	3631697	0	480	480	8903	8903	7566	7566	48785	48785	62.6	1.58	86.07	3878
Candidatus Poribacteria bacterium	JAJDXV000000000	jk18x27bins.53	Ircinia vansoesti	Yes	Yes	No	d__Bacteria;p__Poribacteria;c__WGA-4E;o__WGA-4E;f__WGA-3G;g__WGA-3G;s__	88.74	94.24	1.1	0	5216379	0	181	181	38810	38810	28819	28819	136213	136213	47.9	1.31	87.5	4599
Gammaproteobacteria bacterium	JAJDXW000000000	jk18x27bins.56	Ircinia vansoesti	Yes	Yes	No	d__Bacteria;p__Proteobacteria;c__Gammaproteobacteria;o__HK1;f__;g__;s__	81.02	95.92	2.98	5.26	4770202	0	432	432	15470	15470	11042	11042	54258	54258	69.5	2.12	88.72	4563
Candidatus Binatia bacterium	JAJDXX000000000	jk18x27bins.63	Ircinia vansoesti	Yes	Yes	No	d__Bacteria;p__Binatota;c__Binatia;o__UBA9968;f__;g__;s__	92.02	94.12	0.42	100	4279116	0	253	253	23913	23913	16913	16913	113317	113317	65.9	1.54	88.67	3904
Pseudomonadales bacterium	JAJDXY000000000	jk18x27bins.66	Ircinia vansoesti	No	Yes	Yes	d__Bacteria;p__Proteobacteria;c__Gammaproteobacteria;o__Pseudomonadales;f__Pseudohongiellaceae;g__;s__	86.61	88.46	0.37	0	2550087	0	125	125	33192	33192	20400	20400	83944	83944	61.7	1.62	89.47	2367
Thermoanaerobaculia bacterium	JAJDXZ000000000	jk18x27bins.67	Ircinia vansoesti	Yes	Yes	No	d__Bacteria;p__Acidobacteriota;c__Thermoanaerobaculia;o__UBA5704;f__;g__;s__	76.56	91.51	2.99	0	4378361	0	47	47	148700	148700	93156	93156	725511	725511	68.7	1.18	93.71	3612
Candidatus Dadabacteria bacterium	JAJDYA000000000	jk18x27bins.68	Ircinia vansoesti	No	Yes	No	d__Bacteria;p__Dadabacteria;c__UBA1144;o__;f__;g__;s__	82.72	91.12	1.68	0	1721978	0	67	67	35820	35820	25701	25701	88359	88359	50.2	1.91	89.33	1646
Acidimicrobiia bacterium	JAJDYB000000000	jk18x27bins.69	Ircinia vansoesti	No	Yes	No	d__Bacteria;p__Actinobacteriota;c__Acidimicrobiia;o__Microtrichales;f__UBA11606;g__;s__	81.35	87.75	1.28	0	3484561	0	98	98	57492	57492	35556	35556	119784	119784	70.1	1.19	92.49	3276
Candidatus Latescibacteria bacterium	JAJDYC000000000	jk18x27bins.7	Ircinia vansoesti	No	Yes	No	d__Bacteria;p__Latescibacterota;c__UBA2968;o__UBA2968;f__;g__;s__	84.35	97.8	2.69	37.5	5138534	0	55	55	122976	122976	93427	93427	501907	501907	51.2	1.32	93.31	4431
Prochlorococcaceae cyanobacterium	JAJDYD000000000	jk18x27bins.71	Ircinia vansoesti	No	Yes	No	d__Bacteria;p__Cyanobacteria;c__Cyanobacteriia;o__Synechococcales;f__Cyanobiaceae;g__Synechococcus_B;s__	83.98	86.68	0.54	0	2112504	0	138	138	21287	21287	15308	15308	53703	53703	60	1.94	85.03	2442
Acidimicrobiia bacterium	JAJDYE000000000	jk18x27bins.72	Ircinia vansoesti	Yes	Yes	No	d__Bacteria;p__Actinobacteriota;c__Acidimicrobiia;o__Microtrichales;f__Bin134;g__Bin134;s__	88.47	94.87	1.28	0	3803981	0	42	42	135295	135295	90570	90570	418942	418942	64.6	0.97	93	3634
Defluviicoccus sp.	JAJDYF000000000	jk18x34bins.12	Ircinia vansoesti	No	Yes	Yes	d__Bacteria;p__Proteobacteria;c__Alphaproteobacteria;o__Defluviicoccales;f__Defluviicoccaceae;g__Defluviicoccus;s__	89.48	94.78	1.06	28.57	4760116	0	112	112	92161	92161	42501	42501	231911	231911	67.9	1.78	90.71	4601
Dehalococcoidia bacterium	JAJDYG000000000	jk18x34bins.13	Ircinia vansoesti	Yes	Yes	Yes	d__Bacteria;p__Chloroflexota;c__Dehalococcoidia;o__Bin125;f__Bin125;g__Bin125;s__	88.78	93.73	0.99	0	2874954	0	42	42	110198	110198	68451	68451	239255	239255	64.9	0.75	89.93	2758
Rhodothermales bacterium	JAJDYH000000000	jk18x34bins.15	Ircinia vansoesti	Yes	Yes	Yes	d__Bacteria;p__Bacteroidota;c__Rhodothermia;o__Rhodothermales;f__;g__;s__	90.11	95.76	1.13	0	2669281	0	121	121	33859	33859	22060	22060	80626	80626	61.6	1.92	90.91	2143
Alphaproteobacteria bacterium	JAJDYI000000000	jk18x34bins.19	Ircinia vansoesti	No	Yes	No	d__Bacteria;p__Proteobacteria;c__Alphaproteobacteria;o__UBA7887;f__GCA-2721365;g__;s__	85.61	93.06	1.49	0	3848859	0	87	87	79437	79437	44239	44239	221488	221488	66.2	2.36	85.02	3640
Pseudomonadales bacterium	JAJDYJ000000000	jk18x34bins.22	Ircinia vansoesti	No	Yes	Yes	d__Bacteria;p__Proteobacteria;c__Gammaproteobacteria;o__Pseudomonadales;f__Pseudohongiellaceae;g__UBA9145;s__	85.86	85.86	0	0	3210057	0	105	105	48437	48437	30571	30571	174636	174636	61.2	1.72	91.96	2836
Candidatus Latescibacteria bacterium	JAJDYK000000000	jk18x34bins.24	Ircinia vansoesti	Yes	Yes	No	d__Bacteria;p__Latescibacterota;c__UBA2968;o__UBA8231;f__GCA-002724215;g__GCA-2724215;s__	59.9	87.85	5.59	50	5127195	0	362	362	18744	18744	14163	14163	87954	87954	59.2	1.67	93.56	4682
Alphaproteobacteria bacterium	JAJDYL000000000	jk18x34bins.26	Ircinia vansoesti	Yes	Yes	No	d__Bacteria;p__Proteobacteria;c__Alphaproteobacteria;o__Bin95;f__Bin95;g__Bin95;s__	94.27	96.77	0.5	0	4409628	0	235	235	31087	31087	18764	18764	113457	113457	68.5	2.37	89.73	4307
Rhodospirillales bacterium	JAJDYM000000000	jk18x34bins.29	Ircinia vansoesti	No	Yes	Yes	d__Bacteria;p__Proteobacteria;c__Alphaproteobacteria;o__Rhodospirillales_A;f__;g__;s__	86.8	90.55	0.75	0	3679672	0	53	53	140637	140637	69427	69427	442747	442747	63.4	1.33	89.59	3424
Gemmatimonadetes bacterium	JAJDYN000000000	jk18x34bins.3	Ircinia vansoesti	Yes	Yes	No	d__Bacteria;p__Gemmatimonadota;c__Gemmatimonadetes;o__SG8-23;f__UBA6960;g__BD2-11;s__	83.51	94.51	2.2	0	3544812	0	41	41	160222	160222	86458	86458	368360	368360	68.5	1.34	91.59	2950
Acidimicrobiia bacterium	JAJDYO000000000	jk18x34bins.36	Ircinia vansoesti	No	Yes	No	d__Bacteria;p__Actinobacteriota;c__Acidimicrobiia;o__Microtrichales;f__UBA11606;g__;s__	65.86	85.56	3.94	0	3613582	0	367	367	12607	12607	9846	9846	60622	60622	69.6	1.46	92.9	3690
Gemmatimonadetes bacterium	JAJDYP000000000	jk18x34bins.37	Ircinia vansoesti	No	Yes	No	d__Bacteria;p__Gemmatimonadota;c__Gemmatimonadetes;o__;f__;g__;s__	75.81	92.31	3.3	0	3693839	0	75	75	90943	90943	49251	49251	357169	357169	69.2	1.26	93.22	3199
Gammaproteobacteria bacterium	JAJDYQ000000000	jk18x34bins.42	Ircinia vansoesti	Yes	Yes	No	d__Bacteria;p__Proteobacteria;c__Gammaproteobacteria;o__GCA-2400775;f__;g__;s__	80.68	86.43	1.15	20	1953099	0	108	108	21391	21391	18084	18084	80724	80724	50.3	2.12	90.8	1973
bacterium	JAJDYR000000000	jk18x34bins.43	Ircinia vansoesti	No	Yes	Yes	d__Bacteria;p__UBA8248;c__UBA8248;o__UBA8248;f__UBA8248;g__Bin107;s__	81.48	85.73	0.85	0	3832572	0	45	45	131148	131148	85168	85168	493741	493741	60.7	1.57	85.09	3494
Dehalococcoidia bacterium	JAJDYS000000000	jk18x34bins.47	Ircinia vansoesti	No	Yes	No	d__Bacteria;p__Chloroflexota;c__Dehalococcoidia;o__UBA1151;f__Bin127;g__Bin127;s__	85.81	90.76	0.99	0	2539714	0	31	31	100261	100261	81926	81926	299891	299891	56.1	0.61	90.05	2356
Gemmatimonadetes bacterium	JAJDYT000000000	jk18x34bins.51	Ircinia vansoesti	Yes	Yes	No	d__Bacteria;p__Gemmatimonadota;c__Gemmatimonadetes;o__SG8-23;f__UBA6960;g__Bin94;s__	49.46	93.41	8.79	0	4710222	0	76	76	149087	149087	61976	61976	351211	351211	68.4	1.84	91.48	3941
Acidimicrobiia bacterium	JAJDYU000000000	jk18x34bins.52	Ircinia vansoesti	Yes	Yes	No	d__Bacteria;p__Actinobacteriota;c__Acidimicrobiia;o__Microtrichales;f__Bin134;g__Bin134;s__	79.07	94.02	2.99	50	3332070	0	92	92	69085	69085	36218	36218	234445	234445	65	1.7	94.15	3230
Candidatus Binatia bacterium	JAJDYV000000000	jk18x34bins.53	Ircinia vansoesti	No	Yes	Yes	d__Bacteria;p__Binatota;c__Binatia;o__Bin18;f__Bin18;g__Bin18;s__	65.31	90.51	5.04	0	4752108	0	12	12	635501	635501	396009	396009	1630440	1630440	58.1	0.79	90.64	4646
Dehalococcoidia bacterium	JAJDYW000000000	jk18x34bins.55	Ircinia vansoesti	Yes	Yes	No	d__Bacteria;p__Chloroflexota;c__Dehalococcoidia;o__UBA2991;f__UBA2991;g__UBA2991;s__	80.86	85.81	0.99	0	2629681	0	47	47	113360	113360	55950	55950	374006	374006	70.1	1.45	91.81	2680
Candidatus Latescibacteria bacterium	JAJDYX000000000	jk18x34bins.57	Ircinia vansoesti	No	Yes	No	d__Bacteria;p__Latescibacterota;c__UBA2968;o__UBA2968;f__;g__;s__	95.2	96.7	0.3	0	5494681	0	57	57	147846	147846	96397	96397	322334	322334	50.9	1.11	93.02	4752
Gammaproteobacteria bacterium	JAJDYY000000000	jk18x34bins.59	Ircinia vansoesti	Yes	Yes	Yes	d__Bacteria;p__Proteobacteria;c__Gammaproteobacteria;o__UBA4575;f__UBA4575;g__;s__	90.4	90.4	0	0	1735078	0	8	8	433392	433392	216884	216884	798446	798446	57.2	0.81	89.7	1639
Candidatus Latescibacteria bacterium	JAJDYZ000000000	jk18x34bins.62	Ircinia vansoesti	Yes	Yes	No	d__Bacteria;p__Latescibacterota;c__;o__;f__;g__;s__	97.8	97.8	0	0	3787648	0	12	12	582348	582348	315637	315637	754150	754150	62.5	0.86	90.74	3198
Acidobacteria bacterium	JAJDZA000000000	jk18x34bins.63	Ircinia vansoesti	No	Yes	No	d__Bacteria;p__Acidobacteriota;c__Bin61;o__Bin61;f__Bin61;g__Bin61;s__	84.19	92.74	1.71	0	3385631	0	50	50	103827	103827	67712	67712	305787	305787	69.9	1.01	91.47	2882
Candidatus Poribacteria bacterium	JAJDZB000000000	jk18x34bins.64	Ircinia vansoesti	Yes	Yes	No	d__Bacteria;p__Poribacteria;c__WGA-4E;o__WGA-4E;f__WGA-3G;g__;s__	91.04	96.54	1.1	0	4999207	0	118	118	61663	61663	42366	42366	198463	198463	41.8	0.94	89.02	4054
Candidatus Poribacteria bacterium	JAJDZC000000000	jk18x34bins.7	Ircinia vansoesti	No	Yes	No	d__Bacteria;p__Poribacteria;c__WGA-4E;o__WGA-4E;f__WGA-3G;g__WGA-3G;s__	73.54	96.44	4.58	0	4951912	0	38	38	184876	184876	130313	130313	474634	474634	48.3	0.55	89.66	4211
Candidatus Poribacteria bacterium	JAJDUV000000000	jk18x22bins.10	Ircinia ruetzleri	Yes	Yes	No	d__Bacteria;p__Poribacteria;c__WGA-4E;o__WGA-4E;f__WGA-3G;g__WGA-3G;s__	66.89	94.34	5.49	0	5061612	0	24	24	375189	375189	210900	210900	870069	870069	48.7	0.56	89.35	4326
Anaerolineae bacterium	JAJDUW000000000	jk18x22bins.101	Ircinia ruetzleri	Yes	Yes	No	d__Bacteria;p__Chloroflexota;c__Anaerolineae;o__SBR1031;f__A4b;g__UBA6055;s__	91.82	91.82	0	0	4705750	0	58	58	132157	132157	81133	81133	335253	335253	56.7	1.18	88.99	4050
Gammaproteobacteria bacterium	JAJDUX000000000	jk18x22bins.103	Ircinia ruetzleri	No	Yes	No	d__Bacteria;p__Proteobacteria;c__Gammaproteobacteria;o__UBA10353;f__LS-SOB;g__;s__	82.62	88.72	1.22	0	3435110	0	303	303	14549	14549	11336	11336	50097	50097	62.7	2.38	87.11	3406
Anaerolineae bacterium	JAJDUY000000000	jk18x22bins.106	Ircinia ruetzleri	Yes	Yes	No	d__Bacteria;p__Chloroflexota;c__Anaerolineae;o__SBR1031;f__A4b;g__UBA6055;s__	87.27	91.82	0.91	0	3640193	0	47	47	112325	112325	77450	77450	361575	361575	59.2	0.75	91.48	3210
Silicimonas sp.	JAJDUZ000000000	jk18x22bins.107	Ircinia ruetzleri	Yes	Yes	No	d__Bacteria;p__Proteobacteria;c__Alphaproteobacteria;o__Rhodobacterales;f__Rhodobacteraceae;g__Silicimonas;s__	85.93	91.03	1.02	0	3379777	0	73	73	65933	65933	46298	46298	347366	347366	61.6	1.41	91.44	3451
Caldilineaceae bacterium	JAJDVA000000000	jk18x22bins.14	Ircinia ruetzleri	No	Yes	No	d__Bacteria;p__Chloroflexota;c__Anaerolineae;o__Caldilineales;f__Caldilineaceae;g__Bin5;s__	78.62	92.27	2.73	33.33	4859163	0	59	59	142206	142206	82358	82358	386037	386037	60.7	1.15	86.53	4074
Alphaproteobacteria bacterium	JAJDVB000000000	jk18x22bins.16	Ircinia ruetzleri	Yes	Yes	No	d__Bacteria;p__Proteobacteria;c__Alphaproteobacteria;o__UBA828;f__UBA828;g__;s__	67.08	94.53	5.49	15.79	5180572	0	231	231	40005	40005	22426	22426	131409	131409	66.9	1.84	88.75	4832
Gammaproteobacteria bacterium	JAJDVC000000000	jk18x22bins.18	Ircinia ruetzleri	Yes	Yes	Yes	d__Bacteria;p__Proteobacteria;c__Gammaproteobacteria;o__UBA10353;f__LS-SOB;g__;s__	83.77	93.52	1.95	0	3026118	0	263	263	16833	16833	11506	11506	45723	45723	57.5	2.58	87.5	3092
Candidatus Latescibacteria bacterium	JAJDVD000000000	jk18x22bins.2	Ircinia ruetzleri	Yes	Yes	No	d__Bacteria;p__Latescibacterota;c__UBA2968;o__UBA2968;f__;g__;s__	94.1	95.6	0.3	0	5581596	0	40	40	223823	223823	139539	139539	484970	484970	50.9	1.18	92.64	4876
Acidimicrobiia bacterium	JAJDVE000000000	jk18x22bins.20	Ircinia ruetzleri	Yes	Yes	No	d__Bacteria;p__Actinobacteriota;c__Acidimicrobiia;o__Microtrichales;f__Bin134;g__Bin134;s__	89.33	95.73	1.28	0	3763338	0	36	36	143510	143510	104537	104537	616371	616371	64.7	1.12	93.06	3563
Candidatus Poribacteria bacterium	JAJDVF000000000	jk18x22bins.3	Ircinia ruetzleri	No	Yes	No	d__Bacteria;p__Poribacteria;c__WGA-4E;o__WGA-4E;f__WGA-3G;g__WGA-3G;s__	59.1	86.55	5.49	0	5203907	0	142	142	53205	53205	36647	36647	180467	180467	47.9	1.28	88.02	4403
Gammaproteobacteria bacterium	JAJDVG000000000	jk18x22bins.30	Ircinia ruetzleri	Yes	Yes	Yes	d__Bacteria;p__Proteobacteria;c__Gammaproteobacteria;o__UBA6522;f__UBA6522;g__FEN-1219;s__	76.57	87.12	2.11	14.29	3597012	0	62	62	96665	96665	58016	58016	245955	245955	65	1.02	90.6	3165
Alphaproteobacteria bacterium	JAJDVH000000000	jk18x22bins.31	Ircinia ruetzleri	Yes	Yes	Yes	d__Bacteria;p__Proteobacteria;c__Alphaproteobacteria;o__Bin95;f__Bin95;g__Bin95;s__	96.27	96.27	0	0	4480841	0	279	279	24323	24323	16060	16060	77547	77547	68.3	2.12	89.06	4408
Acidobacteria bacterium	JAJDVI000000000	jk18x22bins.33	Ircinia ruetzleri	Yes	Yes	No	d__Bacteria;p__Acidobacteriota;c__Bin61;o__Bin61;f__Bin61;g__Bin61;s__	86.78	91.03	0.85	0	3850216	0	107	107	70010	70010	35983	35983	200753	200753	69.7	1.84	90.28	3264
Silicimonas sp.	JAJDVJ000000000	jk18x22bins.35	Ircinia ruetzleri	Yes	Yes	No	d__Bacteria;p__Proteobacteria;c__Alphaproteobacteria;o__Rhodobacterales;f__Rhodobacteraceae;g__Silicimonas;s__	73.41	92.86	3.89	43.48	4979526	0	197	197	44364	44364	25276	25276	122400	122400	60.6	1.65	87.1	4839
Anaerolineae bacterium	JAJDVK000000000	jk18x22bins.39	Ircinia ruetzleri	No	Yes	No	d__Bacteria;p__Chloroflexota;c__Anaerolineae;o__SBR1031;f__A4b;g__UBA6055;s__	71.8	90	3.64	25	3835180	0	215	215	26926	26926	17838	17838	184300	184300	59.8	1.55	89.68	3462
Prochlorococcaceae cyanobacterium	JAJDVL000000000	jk18x22bins.40	Ircinia ruetzleri	Yes	Yes	No	d__Bacteria;p__Cyanobacteria;c__Cyanobacteriia;o__Synechococcales;f__Cyanobiaceae;g__Synechococcus_B;s__	91.02	96.47	1.09	50	1990129	0	51	51	59575	59575	39022	39022	126244	126244	61.6	1.53	90.69	2019
Defluviicoccus sp.	JAJDVM000000000	jk18x22bins.41	Ircinia ruetzleri	Yes	Yes	Yes	d__Bacteria;p__Proteobacteria;c__Alphaproteobacteria;o__Defluviicoccales;f__Defluviicoccaceae;g__Defluviicoccus;s__	81.67	95.77	2.82	33.33	5872011	0	377	377	22823	22823	15575	15575	90619	90619	67.7	2.13	89.63	5878
Candidatus Poribacteria bacterium	JAJDVN000000000	jk18x22bins.47	Ircinia ruetzleri	No	Yes	No	d__Bacteria;p__Poribacteria;c__WGA-4E;o__WGA-4E;f__WGA-3G;g__WGA-3G;s__	74	85.25	2.25	0	4612608	0	525	525	10598	10598	8785	8785	40400	40400	48.1	1.48	89.43	4275
Thermoanaerobaculia bacterium	JAJDVO000000000	jk18x22bins.50	Ircinia ruetzleri	Yes	Yes	No	d__Bacteria;p__Acidobacteriota;c__Thermoanaerobaculia;o__UBA5704;f__;g__;s__	81.22	94.02	2.56	0	4265850	0	37	37	191417	191417	115293	115293	541200	541200	68.6	1.28	93.98	3497
Pseudomonadales bacterium	JAJDVP000000000	jk18x22bins.52	Ircinia ruetzleri	Yes	Yes	Yes	d__Bacteria;p__Proteobacteria;c__Gammaproteobacteria;o__Pseudomonadales;f__Pseudohongiellaceae;g__;s__	86.98	88.83	0.37	0	2820046	0	124	124	39510	39510	22742	22742	153434	153434	61.3	1.8	92.72	2536
Acidimicrobiia bacterium	JAJDVQ000000000	jk18x22bins.55	Ircinia ruetzleri	Yes	Yes	No	d__Bacteria;p__Actinobacteriota;c__Acidimicrobiia;o__Microtrichales;f__TK06;g__;s__	73.91	93.16	3.85	20	3640840	0	104	104	65402	65402	35008	35008	150837	150837	67.2	1.81	90.16	3410
Gemmatimonadetes bacterium	JAJDVR000000000	jk18x22bins.6	Ircinia ruetzleri	Yes	Yes	No	d__Bacteria;p__Gemmatimonadota;c__Gemmatimonadetes;o__SG8-23;f__UBA6960;g__BD2-11;s__	50.96	93.41	8.49	18.18	3926247	0	287	287	21497	21497	13680	13680	66535	66535	68	1.61	91.57	3448
Pseudomonadales bacterium	JAJDVS000000000	jk18x22bins.60	Ircinia ruetzleri	Yes	Yes	Yes	d__Bacteria;p__Proteobacteria;c__Gammaproteobacteria;o__Pseudomonadales;f__Pseudohongiellaceae;g__;s__	89.57	89.57	0	0	2642140	0	113	113	39423	39423	23381	23381	114135	114135	61.7	1.55	89.38	2448
Gemmatimonadetes bacterium	JAJDVT000000000	jk18x22bins.63	Ircinia ruetzleri	Yes	Yes	No	d__Bacteria;p__Gemmatimonadota;c__Gemmatimonadetes;o__SG8-23;f__UBA6960;g__Bin94;s__	61.55	97.25	7.14	14.29	4856912	0	143	143	70288	70288	33964	33964	206449	206449	67.8	2.23	90.27	4191
Prochlorococcaceae cyanobacterium	JAJDVU000000000	jk18x22bins.65	Ircinia ruetzleri	No	Yes	No	d__Bacteria;p__Cyanobacteria;c__Cyanobacteriia;o__Synechococcales;f__Cyanobiaceae;g__Synechococcus_B;s__	89.79	90.49	0.14	0	2017280	0	178	178	16080	16080	11333	11333	39899	39899	60.5	1.8	85.59	2343
Rhodothermales bacterium	JAJDVV000000000	jk18x22bins.66	Ircinia ruetzleri	Yes	Yes	Yes	d__Bacteria;p__Bacteroidota;c__Rhodothermia;o__Rhodothermales;f__Bin80;g__Bin80;s__	91.55	94.35	0.56	0	3709492	0	155	155	32959	32959	23932	23932	131124	131124	51.7	1.78	88.43	3175
Pseudomonadales bacterium	JAJDVW000000000	jk18x22bins.7	Ircinia ruetzleri	Yes	Yes	No	d__Bacteria;p__Proteobacteria;c__Gammaproteobacteria;o__Pseudomonadales;f__HTCC2089;g__;s__	63.44	88.74	5.06	10.53	5707692	0	182	182	58549	58549	31360	31360	351513	351513	69	1.41	90.26	5333
Chloroflexi bacterium	JAJDVX000000000	jk18x22bins.70	Ircinia ruetzleri	Yes	Yes	No	d__Bacteria;p__Chloroflexota_B;c__UBA11872;o__UBA11872;f__UBA11872;g__;s__	91.36	91.36	0	0	3542250	0	44	44	139847	139847	80505	80505	306192	306192	65.9	1.79	88.63	3238
Nitrospirales bacterium	JAJDVY000000000	jk18x22bins.71	Ircinia ruetzleri	Yes	Yes	Yes	d__Bacteria;p__Nitrospirota;c__Nitrospiria;o__Nitrospirales;f__UBA8639;g__Bin75;s__	94.03	94.03	0	0	2377051	0	50	50	78259	78259	47541	47541	171458	171458	56.2	1.13	87.82	2344
Candidatus Latescibacteria bacterium	JAJDVZ000000000	jk18x22bins.75	Ircinia ruetzleri	Yes	Yes	No	d__Bacteria;p__Latescibacterota;c__UBA2968;o__UBA8231;f__GCA-002724215;g__GCA-2724215;s__	73.49	95.54	4.41	14.29	6341388	0	178	178	53791	53791	35625	35625	165266	165266	58.7	1.62	92.74	5497
Candidatus Poribacteria bacterium	JAJDWA000000000	jk18x22bins.76	Ircinia ruetzleri	Yes	Yes	No	d__Bacteria;p__Poribacteria;c__WGA-4E;o__WGA-4E;f__WGA-3G;g__;s__	69.66	88.91	3.85	0	5136435	0	75	75	117417	117417	68485	68485	238722	238722	43.2	0.92	87.92	4292
Dehalococcoidia bacterium	JAJDWB000000000	jk18x22bins.80	Ircinia ruetzleri	Yes	Yes	Yes	d__Bacteria;p__Chloroflexota;c__Dehalococcoidia;o__Bin125;f__Bin125;g__Bin125;s__	84.82	94.72	1.98	0	2817722	0	22	22	332927	332927	128078	128078	471140	471140	66.7	1.32	91.6	2662
Phaeobacter sp.	JAJDWC000000000	jk18x22bins.85	Ircinia ruetzleri	Yes	Yes	No	d__Bacteria;p__Proteobacteria;c__Alphaproteobacteria;o__Rhodobacterales;f__Rhodobacteraceae;g__Phaeobacter;s__	94.9	97	0.42	0	3772060	0	163	163	37926	37926	23141	23141	133952	133952	59	2.09	87.88	3586
Anaerolineae bacterium	JAJDWD000000000	jk18x22bins.90	Ircinia ruetzleri	No	Yes	No	d__Bacteria;p__Chloroflexota;c__Anaerolineae;o__SBR1031;f__A4b;g__UBA6055;s__	85.45	90	0.91	0	4324103	0	158	158	43766	43766	27367	27367	174826	174826	58.8	1.37	88.87	3765
Gemmatimonadetes bacterium	JAJDWE000000000	jk18x22bins.97	Ircinia ruetzleri	Yes	Yes	No	d__Bacteria;p__Gemmatimonadota;c__Gemmatimonadetes;o__;f__;g__;s__	73.6	95.6	4.4	25	3486680	0	84	84	58974	58974	41508	41508	188939	188939	69	1.28	93.36	3038
Dehalococcoidia bacterium	JAJDWF000000000	jk18x22bins.99	Ircinia ruetzleri	Yes	Yes	No	d__Bacteria;p__Chloroflexota;c__Dehalococcoidia;o__UBA3495;f__UBA3495;g__Bin87;s__	85.59	95.49	1.98	0	2993650	0	149	149	32005	32005	20091	20091	99901	99901	63.7	1.28	91.28	3050
Gammaproteobacteria bacterium	JAJDWG000000000	jk18x25bins.14	Ircinia ruetzleri	No	Yes	Yes	d__Bacteria;p__Proteobacteria;c__Gammaproteobacteria;o__UBA6522;f__UBA6522;g__FEN-1219;s__	71	87.3	3.26	0	3882369	0	21	21	278667	278667	184874	184874	702493	702493	64.6	1.36	89.47	3377
Alphaproteobacteria bacterium	JAJDWH000000000	jk18x25bins.17	Ircinia ruetzleri	Yes	Yes	No	d__Bacteria;p__Proteobacteria;c__Alphaproteobacteria;o__UBA7887;f__;g__;s__	84.47	90.67	1.24	0	3499008	0	55	55	237001	237001	63618	63618	442976	442976	65.2	1.38	85.82	3336
Candidatus Poribacteria bacterium	JAJDWI000000000	jk18x25bins.18	Ircinia ruetzleri	Yes	Yes	No	d__Bacteria;p__Poribacteria;c__WGA-4E;o__WGA-4E;f__WGA-3G;g__;s__	84.09	95.34	2.25	0	4530593	0	170	170	38797	38797	26650	26650	160358	160358	40.3	1.49	86.12	3804
Alphaproteobacteria bacterium	JAJDWJ000000000	jk18x25bins.22	Ircinia ruetzleri	No	Yes	Yes	d__Bacteria;p__Proteobacteria;c__Alphaproteobacteria;o__Bin65;f__Bin65;g__Bin65;s__	92.63	99.13	1.3	33.33	4067373	0	50	50	159074	159074	81347	81347	472633	472633	67.6	1.57	88.58	3773
Anaerolineae bacterium	JAJDWK000000000	jk18x25bins.25	Ircinia ruetzleri	Yes	Yes	No	d__Bacteria;p__Chloroflexota;c__Anaerolineae;o__SBR1031;f__A4b;g__UBA6055;s__	91.82	91.82	0	0	3663456	0	106	106	56060	56060	34560	34560	218262	218262	60.2	1.47	90.75	3202
Candidatus Latescibacteria bacterium	JAJDWL000000000	jk18x25bins.28	Ircinia ruetzleri	Yes	Yes	No	d__Bacteria;p__Latescibacterota;c__;o__;f__;g__;s__	54.49	92.94	7.69	77.78	3798473	0	230	230	24309	24309	16515	16515	128834	128834	61.7	1.44	90.64	3369
Bryobacterales bacterium	JAJDWM000000000	jk18x25bins.29	Ircinia ruetzleri	Yes	Yes	No	d__Bacteria;p__Acidobacteriota;c__Acidobacteriae;o__Bryobacterales;f__UBA6623;g__;s__	74.48	91.83	3.47	0	6008422	0	796	796	9414	9414	7548	7548	56157	56157	64	2.15	85.82	5407
Rhodobacteraceae bacterium	JAJDWN000000000	jk18x25bins.33	Ircinia ruetzleri	No	Yes	No	d__Bacteria;p__Proteobacteria;c__Alphaproteobacteria;o__Rhodobacterales;f__Rhodobacteraceae;g__Bin36;s__	88.91	88.91	0	0	2735715	0	63	63	61285	61285	43424	43424	210998	210998	44.1	1.43	88.81	2495
Candidatus Latescibacteria bacterium	JAJDWO000000000	jk18x25bins.39	Ircinia ruetzleri	Yes	Yes	No	d__Bacteria;p__Latescibacterota;c__UBA2968;o__UBA8231;f__GCA-002724215;g__GCA-2724215;s__	76.99	97.74	4.15	14.29	5919133	0	250	250	35381	35381	23676	23676	113197	113197	58.8	1.66	93.03	5275
Dehalococcoidia bacterium	JAJDWP000000000	jk18x25bins.41	Ircinia ruetzleri	No	Yes	No	d__Bacteria;p__Chloroflexota;c__Dehalococcoidia;o__UBA2991;f__UBA2991;g__UBA2991;s__	64.62	89.37	4.95	20	2576145	0	268	268	13457	13457	9612	9612	75962	75962	70.3	1.44	92.36	2866
Alphaproteobacteria bacterium	JAJDWQ000000000	jk18x25bins.43	Ircinia ruetzleri	Yes	Yes	No	d__Bacteria;p__Proteobacteria;c__Alphaproteobacteria;o__UBA828;f__UBA828;g__;s__	47.2	96.55	9.87	0	4711751	0	316	316	25665	25665	14910	14910	137834	137834	68.8	2.36	88.89	4414
Gammaproteobacteria bacterium	JAJDWR000000000	jk18x25bins.5	Ircinia ruetzleri	Yes	Yes	Yes	d__Bacteria;p__Proteobacteria;c__Gammaproteobacteria;o__UBA6522;f__UBA6522;g__;s__	59.86	86.26	5.28	4	4478634	0	85	85	120065	120065	52689	52689	302284	302284	63.4	1.59	91.22	3966
Thermoanaerobaculia bacterium	JAJDWS000000000	jk18x25bins.51	Ircinia ruetzleri	Yes	Yes	No	d__Bacteria;p__Acidobacteriota;c__Thermoanaerobaculia;o__UBA5704;f__;g__;s__	64.88	95.73	6.17	0	4506548	0	33	33	227309	227309	136562	136562	807084	807084	68.7	1.2	93.85	3611
Candidatus Poribacteria bacterium	JAJDWT000000000	jk18x25bins.56	Ircinia ruetzleri	Yes	Yes	No	d__Bacteria;p__Poribacteria;c__WGA-4E;o__WGA-4E;f__WGA-3G;g__WGA-3G;s__	72.44	95.34	4.58	0	4839711	0	32	32	368035	368035	151240	151240	571562	571562	48.2	0.6	89.77	4126
Alphaproteobacteria bacterium	JAJDWU000000000	jk18x25bins.57	Ircinia ruetzleri	No	Yes	No	d__Bacteria;p__Proteobacteria;c__Alphaproteobacteria;o__UBA828;f__UBA828;g__;s__	59.81	90.36	6.11	10	3862678	0	301	301	19440	19440	12832	12832	70689	70689	70.3	1.84	91.63	3772
Caldilineaceae bacterium	JAJDWV000000000	jk18x25bins.58	Ircinia ruetzleri	No	Yes	No	d__Bacteria;p__Chloroflexota;c__Anaerolineae;o__Caldilineales;f__Caldilineaceae;g__Bin5;s__	84.53	98.18	2.73	33.33	5154779	0	71	71	106851	106851	72602	72602	375800	375800	60.4	1.55	88.63	4398
Bryobacterales bacterium	JAJDWW000000000	jk18x25bins.60	Ircinia ruetzleri	No	Yes	No	d__Bacteria;p__Acidobacteriota;c__Acidobacteriae;o__Bryobacterales;f__UBA6623;g__;s__	64.76	86.11	4.27	0	5360705	0	204	204	40964	40964	26277	26277	183267	183267	64.1	1.68	88.06	4373
Rhodothermales bacterium	JAJDWX000000000	jk18x25bins.61	Ircinia ruetzleri	Yes	Yes	Yes	d__Bacteria;p__Bacteroidota;c__Rhodothermia;o__Rhodothermales;f__;g__;s__	90.4	96.05	1.13	0	3020274	0	49	49	110148	110148	61638	61638	212003	212003	60.5	1.99	90.2	2420
Gemmatimonadetes bacterium	JAJDWY000000000	jk18x25bins.66	Ircinia ruetzleri	No	Yes	No	d__Bacteria;p__Gemmatimonadota;c__Gemmatimonadetes;o__SG8-23;f__UBA6960;g__BD2-11;s__	80.2	96.7	3.3	0	3786432	0	99	99	75492	75492	38246	38246	234570	234570	68.4	1.16	92.09	3152
Candidatus Binatia bacterium	JAJDWZ000000000	jk18x25bins.70	Ircinia ruetzleri	No	Yes	No	d__Bacteria;p__Binatota;c__Binatia;o__Bin18;f__Bin18;g__Bin18;s__	69.51	90.51	4.2	0	4754872	0	30	30	254692	254692	158495	158495	412047	412047	58.1	1.18	90.59	4650
Rhodospirillales bacterium	JAJDXA000000000	jk18x25bins.8	Ircinia ruetzleri	No	Yes	Yes	d__Bacteria;p__Proteobacteria;c__Alphaproteobacteria;o__Rhodospirillales_A;f__;g__;s__	84.36	86.86	0.5	100	3212988	0	320	320	14121	14121	10040	10040	49792	49792	63.3	2.18	91.18	3206
Vicinamibacteria bacterium	JAJDXB000000000	jk18x25bins.82	Ircinia ruetzleri	Yes	Yes	No	d__Bacteria;p__Acidobacteriota;c__Vicinamibacteria;o__Vicinamibacterales;f__UBA8438;g__;s__	80.32	94.02	2.74	0	4466714	0	162	162	46109	46109	27572	27572	153617	153617	69.3	1.66	92.75	3926
Candidatus Latescibacteria bacterium	JAJDXC000000000	jk18x25bins.86	Ircinia ruetzleri	No	Yes	No	d__Bacteria;p__Latescibacterota;c__;o__;f__;g__;s__	91.21	91.21	0	0	3505736	0	39	39	218255	218255	89890	89890	671071	671071	62.3	2.39	90.81	2978
Gammaproteobacteria bacterium	JAJDXD000000000	jk18x25bins.87	Ircinia ruetzleri	Yes	Yes	Yes	d__Bacteria;p__Proteobacteria;c__Gammaproteobacteria;o__UBA10353;f__;g__;s__	95.66	97.06	0.28	100	3149712	0	166	166	35069	35069	18974	18974	109610	109610	47.1	1.9	88.01	2947
Dehalococcoidia bacterium	JAJDXE000000000	jk18x25bins.9	Ircinia ruetzleri	Yes	Yes	Yes	d__Bacteria;p__Chloroflexota;c__Dehalococcoidia;o__Bin125;f__Bin125;g__Bin125;s__	85.5	91.55	1.21	0	2888612	0	16	16	342903	342903	180538	180538	750749	750749	64.3	0.68	91.82	2720
Acidobacteria bacterium	JAJEFG000000000	p16x43bins.1	Ircinia lowi	Yes	Yes	No	d__Bacteria;p__Acidobacteriota;c__Bin61;o__Bin61;f__Bin61;g__Bin61;s__	87.61	87.61	0	0	3455068	0	108	108	54478	54478	31991	31991	141359	141359	69.7	1.23	90.86	2929
Rhodospirillales bacterium	JAJEFH000000000	p16x43bins.13	Ircinia lowi	No	Yes	No	d__Bacteria;p__Proteobacteria;c__Alphaproteobacteria;o__Rhodospirillales_A;f__;g__;s__	78.04	87.44	1.88	71.43	3138195	0	446	446	8837	8837	7036	7036	28027	28027	63.5	2.02	90.25	3262
Alphaproteobacteria bacterium	JAJEFI000000000	p16x43bins.26	Ircinia lowi	No	Yes	Yes	d__Bacteria;p__Proteobacteria;c__Alphaproteobacteria;o__Bin95;f__Bin95;g__Bin95;s__	89.55	99.5	1.99	0	4828974	0	157	157	59345	59345	30757	30757	204142	204142	68.4	2.36	89.83	4628
Candidatus Latescibacteria bacterium	JAJEFJ000000000	p16x43bins.30	Ircinia lowi	Yes	Yes	No	d__Bacteria;p__Latescibacterota;c__UBA2968;o__UBA8231;f__GCA-002724215;g__GCA-2724215;s__	76.99	97.74	4.15	0	6255866	0	107	107	114369	114369	58466	58466	296212	296212	58.7	1.23	92.8	5431
Acidimicrobiia bacterium	JAJEFK000000000	p16x43bins.35	Ircinia lowi	Yes	Yes	No	d__Bacteria;p__Actinobacteriota;c__Acidimicrobiia;o__Microtrichales;f__TK06;g__;s__	85.88	96.58	2.14	0	3291024	0	61	61	98597	98597	53951	53951	264822	264822	67.5	1.25	92.58	3008
Rhodothermales bacterium	JAJEFL000000000	p16x43bins.4	Ircinia lowi	Yes	Yes	Yes	d__Bacteria;p__Bacteroidota;c__Rhodothermia;o__Rhodothermales;f__Bin80;g__Bin80;s__	90.7	93.5	0.56	0	3682281	0	210	210	24439	24439	17534	17534	70608	70608	51.7	2.13	88.51	3212
Caldilineaceae bacterium	JAJEFM000000000	p16x43bins.45	Ircinia lowi	No	Yes	No	d__Bacteria;p__Chloroflexota;c__Anaerolineae;o__Caldilineales;f__Caldilineaceae;g__Bin5;s__	95.45	95.45	0	0	4944655	0	63	63	118020	118020	78486	78486	416201	416201	60.4	1.47	89.15	4172
Dehalococcoidia bacterium	JAJEFN000000000	p16x43bins.48	Ircinia lowi	No	Yes	Yes	d__Bacteria;p__Chloroflexota;c__Dehalococcoidia;o__Bin125;f__Bin125;g__Bin125;s__	73.93	93.73	3.96	0	3174276	0	95	95	46096	46096	33413	33413	185153	185153	64.9	1.05	89.34	3046
Silicimonas sp.	JAJEFO000000000	p16x43bins.5	Ircinia lowi	Yes	Yes	Yes	d__Bacteria;p__Proteobacteria;c__Alphaproteobacteria;o__Rhodobacterales;f__Rhodobacteraceae;g__Silicimonas;s__	79.56	94.51	2.99	14.29	4713777	0	135	135	56158	56158	34916	34916	238219	238219	60.9	1.4	87.16	4472
Gammaproteobacteria bacterium	JAJEFP000000000	p16x43bins.54	Ircinia lowi	No	Yes	Yes	d__Bacteria;p__Proteobacteria;c__Gammaproteobacteria;o__UBA6522;f__UBA6522;g__FEN-1219;s__	73.4	86.6	2.64	0	3923466	0	15	15	561761	561761	261564	261564	1319750	1319750	64.8	0.91	89.57	3414
bacterium	JAJEFQ000000000	p16x43bins.55	Ircinia lowi	No	Yes	No	d__Bacteria;p__UBA8248;c__UBA8248;o__UBA8248;f__UBA8248;g__Bin107;s__	89.12	93.37	0.85	0	3875813	0	50	50	146141	146141	77516	77516	495647	495647	60.3	2.17	85.99	3540
Anaerolineae bacterium	JAJEFR000000000	p16x43bins.57	Ircinia lowi	No	Yes	No	d__Bacteria;p__Chloroflexota;c__Anaerolineae;o__SBR1031;f__A4b;g__UBA6055;s__	86.36	90.91	0.91	0	4087103	0	103	103	71949	71949	39680	39680	254796	254796	59.4	1.42	89.32	3636
Nitrospirales bacterium	JAJEFS000000000	p16x43bins.60	Ircinia lowi	No	Yes	Yes	d__Bacteria;p__Nitrospirota;c__Nitrospiria;o__Nitrospirales;f__UBA8639;g__Bin75;s__	78.43	97.73	3.86	0	2559037	0	44	44	85108	85108	58159	58159	199963	199963	56.4	1.31	87.78	2506
Candidatus Latescibacteria bacterium	JAJEFT000000000	p16x43bins.62	Ircinia lowi	Yes	Yes	No	d__Bacteria;p__Latescibacterota;c__UBA2968;o__UBA2968;f__;g__;s__	78.16	93.41	3.05	50	4451831	0	392	392	16574	16574	11356	11356	60394	60394	51.3	1.71	93.06	4216
Pseudomonadales bacterium	JAJEFU000000000	p16x43bins.65	Ircinia lowi	No	Yes	Yes	d__Bacteria;p__Proteobacteria;c__Gammaproteobacteria;o__Pseudomonadales;f__Pseudohongiellaceae;g__;s__	75.99	86.79	2.16	12.5	2925913	0	287	287	13369	13369	10194	10194	59520	59520	61.5	1.76	92.8	2767
Rhodothermales bacterium	JAJEFV000000000	p16x43bins.66	Ircinia lowi	No	Yes	Yes	d__Bacteria;p__Bacteroidota;c__Rhodothermia;o__Rhodothermales;f__;g__;s__	89.27	94.92	1.13	0	2856590	0	140	140	31551	31551	20404	20404	96335	96335	61	1.92	90.4	2325
Candidatus Dadabacteria bacterium	JAJEFW000000000	p16x43bins.9	Ircinia lowi	No	Yes	No	d__Bacteria;p__Dadabacteria;c__UBA1144;o__;f__;g__;s__	83.99	96.59	2.52	33.33	1739203	0	33	33	84548	84548	52703	52703	150493	150493	51.4	1.45	90.59	1598
Thermoanaerobaculia bacterium	JAJEFX000000000	p16x44bins.13	Ircinia lowi	Yes	Yes	No	d__Bacteria;p__Acidobacteriota;c__Thermoanaerobaculia;o__UBA5704;f__;g__;s__	86.32	94.87	1.71	0	4166888	0	57	57	153778	153778	73103	73103	362147	362147	68.8	1.43	94.27	3399
Gammaproteobacteria bacterium	JAJEFY000000000	p16x44bins.17	Ircinia lowi	No	Yes	Yes	d__Bacteria;p__Proteobacteria;c__Gammaproteobacteria;o__UBA10353;f__;g__;s__	89.78	97.48	1.54	33.33	3126287	0	55	55	88302	88302	56841	56841	280199	280199	47.1	1.48	88.06	2859
Pseudomonadales bacterium	JAJEFZ000000000	p16x44bins.19	Ircinia lowi	No	Yes	Yes	d__Bacteria;p__Proteobacteria;c__Gammaproteobacteria;o__Pseudomonadales;f__HTCC2089;g__UBA2168;s__	61.85	85.05	4.64	21.05	4142065	0	405	405	14354	14354	10227	10227	52761	52761	64.5	1.79	92.69	4010
Anaerolineae bacterium	JAJEGA000000000	p16x44bins.21	Ircinia lowi	Yes	Yes	No	d__Bacteria;p__Chloroflexota;c__Anaerolineae;o__SBR1031;f__A4b;g__UBA6055;s__	90.91	90.91	0	0	4218062	0	127	127	56945	56945	33213	33213	125616	125616	58.8	1.07	88.95	3711
Prochlorococcaceae cyanobacterium	JAJEGB000000000	p16x44bins.23	Ircinia lowi	No	Yes	No	d__Bacteria;p__Cyanobacteria;c__Cyanobacteriia;o__Synechococcales;f__Cyanobiaceae;g__Synechococcus_B;s__	81.36	86.81	1.09	80	1659430	0	110	110	21347	21347	15085	15085	77565	77565	62	2.02	90.84	1745
Candidatus Poribacteria bacterium	JAJEGC000000000	p16x44bins.24	Ircinia lowi	Yes	Yes	No	d__Bacteria;p__Poribacteria;c__WGA-4E;o__WGA-4E;f__WGA-3G;g__WGA-3G;s__	56.99	95.44	7.69	0	6177257	0	96	96	102943	102943	64346	64346	422134	422134	47.7	1.03	88.83	5163
Nitrosopumilaceae archaeon	JAJEGD000000000	p16x44bins.32	Ircinia lowi	No (Archaea)	No (Archaea)	Not evaluated	d__Archaea;p__Crenarchaeota;c__Nitrososphaeria;o__Nitrososphaerales;f__Nitrosopumilaceae;g__;s__	80.59	85.44	0.97	0	1483815	0	144	144	12887	12887	10304	10304	59895	59895	60.4	1.83	85.73	1575
Candidatus Binatia bacterium	JAJEGE000000000	p16x44bins.4	Ircinia lowi	No	Yes	Yes	d__Bacteria;p__Binatota;c__Binatia;o__Bin18;f__Bin18;g__Bin18;s__	67.83	88.83	4.2	0	4692606	0	79	79	102230	102230	59400	59400	336345	336345	58.1	1.62	90.63	4621
Chloroflexi bacterium	JAJEGF000000000	p16x44bins.42	Ircinia lowi	Yes	Yes	No	d__Bacteria;p__Chloroflexota_B;c__UBA11872;o__UBA11872;f__UBA11872;g__;s__	90.43	90.43	0	0	3628302	0	92	92	69142	69142	39438	39438	311252	311252	65.7	1.91	88.42	3367
Candidatus Poribacteria bacterium	JAJEGG000000000	p16x44bins.48	Ircinia lowi	No	Yes	No	d__Bacteria;p__Poribacteria;c__WGA-4E;o__WGA-4E;f__WGA-3G;g__WGA-3G;s__	71.14	93.14	4.4	0	4671110	0	41	41	229718	229718	113929	113929	616042	616042	48.3	1.24	89.4	3984
Alphaproteobacteria bacterium	JAJEGH000000000	p16x44bins.53	Ircinia lowi	Yes	Yes	Yes	d__Bacteria;p__Proteobacteria;c__Alphaproteobacteria;o__Bin65;f__Bin65;g__Bin65;s__	96.11	98.26	0.43	0	4042993	0	51	51	126512	126512	79274	79274	262506	262506	67.5	1.28	88.56	3780
Candidatus Poribacteria bacterium	JAJEGI000000000	p16x44bins.54	Ircinia lowi	Yes	Yes	No	d__Bacteria;p__Poribacteria;c__WGA-4E;o__WGA-4E;f__WGA-3G;g__WGA-3G;s__	69.28	97.38	5.62	0	5811919	0	182	182	49791	49791	31933	31933	228201	228201	47.5	1.24	88.22	4918
Alphaproteobacteria bacterium	JAJEGJ000000000	p16x44bins.6	Ircinia lowi	Yes	Yes	Yes	d__Bacteria;p__Proteobacteria;c__Alphaproteobacteria;o__UBA7887;f__;g__;s__	75.27	86.02	2.15	50	3602448	0	123	123	72795	72795	29288	29288	299080	299080	65.4	1.77	86.24	3331
Rhodobacteraceae bacterium	JAJEGK000000000	p16x44bins.9	Ircinia lowi	No	Yes	No	d__Bacteria;p__Proteobacteria;c__Alphaproteobacteria;o__Rhodobacterales;f__Rhodobacteraceae;g__Bin36;s__	84.11	90.11	1.2	66.67	2618807	0	42	42	105301	105301	62352	62352	172888	172888	44.3	1.17	89.31	2402
Caldilineaceae bacterium	JAJEGL000000000	p16x57bins.10	Ircinia laeviconulosa	No	Yes	No	d__Bacteria;p__Chloroflexota;c__Anaerolineae;o__Caldilineales;f__Caldilineaceae;g__Bin5;s__	89.54	98.64	1.82	50	5120417	0	169	169	49040	49040	30298	30298	190415	190415	60.8	1.49	86.86	4312
Acidimicrobiia bacterium	JAJEGM000000000	p16x57bins.12	Ircinia laeviconulosa	Yes	Yes	No	d__Bacteria;p__Actinobacteriota;c__Acidimicrobiia;o__Microtrichales;f__Bin134;g__Bin134;s__	87.62	94.02	1.28	0	3438613	0	57	57	102205	102205	60326	60326	272003	272003	65	1.21	93.8	3207
Gammaproteobacteria bacterium	JAJEGN000000000	p16x57bins.13	Ircinia laeviconulosa	No	Yes	Yes	d__Bacteria;p__Proteobacteria;c__Gammaproteobacteria;o__UBA6522;f__UBA6522;g__FEN-1219;s__	75.25	87.3	2.41	0	3733655	0	22	22	265972	265972	169711	169711	522765	522765	64.8	0.77	90.19	3254
Candidatus Dadabacteria bacterium	JAJEGO000000000	p16x57bins.17	Ircinia laeviconulosa	Yes	Yes	No	d__Bacteria;p__Dadabacteria;c__UBA1144;o__;f__;g__;s__	91.23	95.68	0.89	0	1574925	0	71	71	33734	33734	22182	22182	97327	97327	51.6	1.92	90.84	1527
Gemmatimonadetes bacterium	JAJEGP000000000	p16x57bins.24	Ircinia laeviconulosa	No	Yes	No	d__Bacteria;p__Gemmatimonadota;c__Gemmatimonadetes;o__SG8-23;f__UBA6960;g__Bin94;s__	75.8	97.8	4.4	0	4435654	0	235	235	35321	35321	18875	18875	120145	120145	67.6	2.04	90.22	3917
Chloroflexi bacterium	JAJEGQ000000000	p16x57bins.27	Ircinia laeviconulosa	Yes	Yes	No	d__Bacteria;p__Chloroflexota_B;c__UBA11872;o__UBA11872;f__UBA11872;g__;s__	90.12	90.12	0	0	3296620	0	31	31	168293	168293	106342	106342	245255	245255	65.9	1.29	88.82	3036
Alphaproteobacteria bacterium	JAJEGR000000000	p16x57bins.32	Ircinia laeviconulosa	Yes	Yes	No	d__Bacteria;p__Proteobacteria;c__Alphaproteobacteria;o__UBA7887;f__GCA-2721365;g__;s__	85.81	89.56	0.75	0	3369953	0	111	111	79641	79641	30359	30359	240616	240616	66.8	1.45	86.01	3183
Candidatus Latescibacteria bacterium	JAJEGS000000000	p16x57bins.35	Ircinia laeviconulosa	Yes	Yes	No	d__Bacteria;p__Latescibacterota;c__UBA2968;o__UBA8231;f__GCA-002724215;g__GCA-2724215;s__	79.34	96.34	3.4	0	6021571	0	62	62	163004	163004	97122	97122	563036	563036	58.8	1.23	93.27	5111
bacterium	JAJEGT000000000	p16x57bins.38	Ircinia laeviconulosa	Yes	Yes	No	d__Bacteria;p__UBA8248;c__UBA8248;o__UBA8248;f__UBA8248;g__Bin107;s__	83.19	87.44	0.85	0	3845277	0	180	180	38629	38629	21362	21362	160452	160452	61.1	2.36	84.47	3579
Pseudomonadales bacterium	JAJEGU000000000	p16x57bins.39	Ircinia laeviconulosa	Yes	Yes	Yes	d__Bacteria;p__Proteobacteria;c__Gammaproteobacteria;o__Pseudomonadales;f__Pseudohongiellaceae;g__;s__	88.27	90.12	0.37	0	3098162	0	85	85	51552	51552	36448	36448	150845	150845	61.3	1.24	89.53	2701
Candidatus Latescibacteria bacterium	JAJEGV000000000	p16x57bins.40	Ircinia laeviconulosa	No	Yes	No	d__Bacteria;p__Latescibacterota;c__;o__;f__;g__;s__	91.2	96.7	1.1	0	3342077	0	383	383	11606	11606	8726	8726	36721	36721	62.6	1.88	91.03	3162
Silicimonas sp.	JAJEGW000000000	p16x57bins.41	Ircinia laeviconulosa	No	Yes	Yes	d__Bacteria;p__Proteobacteria;c__Alphaproteobacteria;o__Rhodobacterales;f__Rhodobacteraceae;g__Silicimonas;s__	70.68	88.83	3.63	38.89	4445256	0	220	220	39953	39953	20205	20205	168660	168660	61.1	1.59	86.6	4402
Alphaproteobacteria bacterium	JAJEGX000000000	p16x57bins.45	Ircinia laeviconulosa	No	Yes	Yes	d__Bacteria;p__Proteobacteria;c__Alphaproteobacteria;o__Bin95;f__Bin95;g__Bin95;s__	92.68	97.68	1	100	4396077	0	374	374	16629	16629	11754	11754	71581	71581	68.7	1.85	90.71	4426
Dehalococcoidia bacterium	JAJEGY000000000	p16x57bins.56	Ircinia laeviconulosa	Yes	Yes	No	d__Bacteria;p__Chloroflexota;c__Dehalococcoidia;o__UBA1151;f__Bin127;g__Bin127;s__	88.78	93.73	0.99	0	2468524	0	42	42	89476	89476	58774	58774	264337	264337	56.1	0.8	90.5	2314
Gammaproteobacteria bacterium	JAJEGZ000000000	p16x60bins.11	Ircinia laeviconulosa	Yes	Yes	Yes	d__Bacteria;p__Proteobacteria;c__Gammaproteobacteria;o__UBA10353;f__LS-SOB;g__;s__	89.94	96.04	1.22	50	3520569	0	70	70	97967	97967	50293	50293	238564	238564	62.6	1.64	87.86	3268
Rhodospirillales bacterium	JAJEHA000000000	p16x60bins.17	Ircinia laeviconulosa	Yes	Yes	No	d__Bacteria;p__Proteobacteria;c__Alphaproteobacteria;o__Rhodospirillales_A;f__;g__;s__	89.53	94.53	1	0	3504362	0	130	130	46850	46850	26956	26956	128374	128374	63.3	1.79	89.46	3351
Anaerolineae bacterium	JAJEHB000000000	p16x60bins.18	Ircinia laeviconulosa	No	Yes	No	d__Bacteria;p__Chloroflexota;c__Anaerolineae;o__SBR1031;f__A4b;g__UBA6055;s__	76.67	91.82	3.03	0	4147548	0	147	147	40465	40465	28214	28214	175742	175742	59.5	1.57	89.26	3720
Acidobacteria bacterium	JAJEHC000000000	p16x60bins.21	Ircinia laeviconulosa	No	Yes	No	d__Bacteria;p__Acidobacteriota;c__Bin61;o__Bin61;f__Bin61;g__Bin61;s__	74.38	87.18	2.56	0	3000371	0	234	234	18272	18272	12822	12822	74913	74913	70.1	1.3	91.91	2654
Acidimicrobiia bacterium	JAJEHD000000000	p16x60bins.22	Ircinia laeviconulosa	Yes	Yes	No	d__Bacteria;p__Actinobacteriota;c__Acidimicrobiia;o__Microtrichales;f__UBA11606;g__;s__	76.5	91.45	2.99	0	3887711	0	21	21	312566	312566	185129	185129	756421	756421	69.3	1.21	93.09	3615
Acidimicrobiia bacterium	JAJEHE000000000	p16x60bins.25	Ircinia laeviconulosa	Yes	No (due to stochasticity in dereplication pipeline)	No	d__Bacteria;p_;p__Actinobacteriota;c__Acidimicrobiia;o__Microtrichales;f__Bin134;g__Bin134;s__	82.46	93.16	2.14	0	3596555	0	77	77	78124	78124	46708	46708	189938	189938	64.7	1.56	93.68	3442
Bryobacterales bacterium	JAJEHF000000000	p16x60bins.27	Ircinia laeviconulosa	Yes	Yes	Yes	d__Bacteria;p__Acidobacteriota;c__Acidobacteriae;o__Bryobacterales;f__UBA6623;g__;s__	86.96	95.51	1.71	0	6067373	0	231	231	44525	44525	26265	26265	179144	179144	64	1.71	88.12	4917
Nitrosopumilaceae archaeon	JAJEHG000000000	p16x60bins.31	Ircinia laeviconulosa	No (Archaea)	No (Archaea)	Not evaluated	d__Archaea;p__Crenarchaeota;c__Nitrososphaeria;o__Nitrososphaerales;f__Nitrosopumilaceae;g__;s__	90.3	95.15	0.97	0	1696603	0	68	68	38045	38045	24950	24950	110119	110119	59.8	1.73	85.92	1738
Rhodothermales bacterium	JAJEHH000000000	p16x60bins.32	Ircinia laeviconulosa	No	Yes	Yes	d__Bacteria;p__Bacteroidota;c__Rhodothermia;o__Rhodothermales;f__;g__;s__	83.05	94.35	2.26	50	2653232	0	138	138	29212	29212	19226	19226	132507	132507	61.4	1.83	90.97	2158
Defluviicoccus sp.	JAJEHI000000000	p16x60bins.37	Ircinia laeviconulosa	No	Yes	Yes	d__Bacteria;p__Proteobacteria;c__Alphaproteobacteria;o__Defluviicoccales;f__Defluviicoccaceae;g__Defluviicoccus;s__	96.5	99	0.5	0	4806814	0	198	198	40372	40372	24276	24276	194107	194107	67.8	1.6	90.54	4666
Prochlorococcaceae cyanobacterium	JAJEHJ000000000	p16x60bins.38	Ircinia laeviconulosa	No	Yes	No	d__Bacteria;p__Cyanobacteria;c__Cyanobacteriia;o__Synechococcales;f__Cyanobiaceae;g__Synechococcus_B;s__	91.51	95.11	0.72	50	2336387	0	149	149	20825	20825	15680	15680	84661	84661	60.1	1.72	85.5	2702
Alphaproteobacteria bacterium	JAJEHK000000000	p16x60bins.4	Ircinia laeviconulosa	Yes	Yes	No	d__Bacteria;p__Proteobacteria;c__Alphaproteobacteria;o__SP197;f__SP197;g__SP197;s__	77.23	87.73	2.1	25	3533040	0	349	349	14226	14226	10123	10123	77984	77984	63.7	1.62	90.5	3528
Candidatus Latescibacteria bacterium	JAJEHL000000000	p16x60bins.49	Ircinia laeviconulosa	Yes	Yes	No	d__Bacteria;p__Latescibacterota;c__UBA2968;o__UBA2968;f__;g__;s__	94.1	95.6	0.3	0	5336326	0	51	51	150750	150750	104633	104633	739900	739900	51	1.09	92.74	4698
Alphaproteobacteria bacterium	JAJEHM000000000	p16x60bins.55	Ircinia laeviconulosa	No	Yes	Yes	d__Bacteria;p__Proteobacteria;c__Alphaproteobacteria;o__Bin65;f__Bin65;g__Bin65;s__	88.21	96.96	1.75	80	4002789	0	322	322	18243	18243	12431	12431	80890	80890	67.5	2.06	88.91	3960
Thermoanaerobaculia bacterium	JAJEHN000000000	p16x60bins.57	Ircinia laeviconulosa	No	Yes	No	d__Bacteria;p__Acidobacteriota;c__Thermoanaerobaculia;o__UBA5704;f__;g__;s__	86.32	94.87	1.71	0	4507562	0	38	38	201654	201654	118620	118620	600649	600649	68.8	0.89	94.26	3600
Dehalococcoidia bacterium	JAJEHO000000000	p16x60bins.58	Ircinia laeviconulosa	No	Yes	No	d__Bacteria;p__Chloroflexota;c__Dehalococcoidia;o__UBA2963;f__UBA2963;g__Bin16;s__	77.56	94.06	3.3	28.57	2742417	0	314	314	11516	11516	8733	8733	55361	55361	66.9	1.67	90.27	2858
Dehalococcoidia bacterium	JAJEHP000000000	p16x60bins.61	Ircinia laeviconulosa	No	Yes	Yes	d__Bacteria;p__Chloroflexota;c__Dehalococcoidia;o__Bin125;f__Bin125;g__Bin125;s__	88.57	94.52	1.19	0	3217957	0	73	73	81031	81031	44081	44081	217295	217295	64.9	0.85	89.15	3073
Gammaproteobacteria bacterium	JAJEHQ000000000	p16x60bins.63	Ircinia laeviconulosa	Yes	Yes	Yes	d__Bacteria;p__Proteobacteria;c__Gammaproteobacteria;o__UBA10353;f__;g__;s__	95.8	95.8	0	0	3175915	0	44	44	116684	116684	72179	72179	212219	212219	47	1.2	87.78	2917
Acidimicrobiia bacterium	JAJEHR000000000	p16x60bins.66	Ircinia laeviconulosa	No	Yes	No	d__Bacteria;p__Actinobacteriota;c__Acidimicrobiia;o__Microtrichales;f__TK06;g__;s__	82.49	97.44	2.99	0	3273961	0	9	9	990192	990192	363773	363773	1189356	1189356	67.9	1.01	92.6	2915
Rhodobacteraceae bacterium	JAJEHS000000000	p16x60bins.67	Ircinia laeviconulosa	Yes	Yes	No	d__Bacteria;p__Proteobacteria;c__Alphaproteobacteria;o__Rhodobacterales;f__Rhodobacteraceae;g__Bin36;s__	90.11	90.11	0	0	2620929	0	8	8	388176	388176	327616	327616	779291	779291	44.2	0.46	89.62	2354
Candidatus Binatia bacterium	JAJEHT000000000	p16x60bins.8	Ircinia laeviconulosa	Yes	Yes	Yes	d__Bacteria;p__Binatota;c__Binatia;o__Bin18;f__Bin18;g__Bin18;s__	71.61	88.41	3.36	0	4640509	0	35	35	252257	252257	132585	132585	693693	693693	58	2.16	90.87	4552
Dehalococcoidia bacterium	JAJEHU000000000	p16x60bins.9	Ircinia laeviconulosa	No	Yes	No	d__Bacteria;p__Chloroflexota;c__Dehalococcoidia;o__UBA2991;f__UBA2991;g__UBA2991;s__	77.01	86.91	1.98	0	2418870	0	174	174	20489	20489	13901	13901	94459	94459	70.6	1.28	92.65	2640
Candidatus Poribacteria bacterium	JAJEDK000000000	p16x33bins.15	Ircinia radix	No	Yes	No	d__Bacteria;p__Poribacteria;c__WGA-4E;o__WGA-4E;f__WGA-3G;g__WGA-3G;s__	73.54	96.44	4.58	0	5028038	0	29	29	258415	258415	173380	173380	697730	697730	48.2	0.55	89.57	4285
Candidatus Dadabacteria bacterium	JAJEDL000000000	p16x33bins.19	Ircinia radix	No	Yes	No	d__Bacteria;p__Dadabacteria;c__UBA1144;o__;f__;g__;s__	81.46	89.86	1.68	0	1729869	0	53	53	45857	45857	32639	32639	140425	140425	50.5	1.68	90.15	1651
Pseudomonadales bacterium	JAJEDM000000000	p16x33bins.2	Ircinia radix	Yes	Yes	Yes	d__Bacteria;p__Proteobacteria;c__Gammaproteobacteria;o__Pseudomonadales;f__HTCC2089;g__UBA2168;s__	71.64	86.44	2.96	7.14	4407373	0	212	212	32342	32342	20789	20789	73037	73037	64.3	1.93	92.26	4092
Candidatus Poribacteria bacterium	JAJEDN000000000	p16x33bins.23	Ircinia radix	Yes	Yes	No	d__Bacteria;p__Poribacteria;c__WGA-4E;o__WGA-4E;f__WGA-3G;g__WGA-3G;s__	72.89	95.34	4.49	0	5370201	0	133	133	59620	59620	40377	40377	194182	194182	47.5	1.04	87.77	4520
Alphaproteobacteria bacterium	JAJEDO000000000	p16x33bins.28	Ircinia radix	No	Yes	Yes	d__Bacteria;p__Proteobacteria;c__Alphaproteobacteria;o__Bin95;f__Bin95;g__Bin95;s__	86.55	89.05	0.5	100	3526578	0	427	427	10435	10435	8258	8258	46565	46565	68.6	2.06	91.03	3683
Anaerolineae bacterium	JAJEDP000000000	p16x33bins.3	Ircinia radix	No	Yes	No	d__Bacteria;p__Chloroflexota;c__Anaerolineae;o__SBR1031;f__A4b;g__UBA6055;s__	81.81	90.91	1.82	0	4022382	0	123	123	50456	50456	32702	32702	209442	209442	59.5	1.34	89.28	3618
Acidimicrobiia bacterium	JAJEDQ000000000	p16x33bins.34	Ircinia radix	Yes	Yes	No	d__Bacteria;p__Actinobacteriota;c__Acidimicrobiia;o__Microtrichales;f__Bin134;g__Bin134;s__	79.51	92.31	2.56	25	3409246	0	256	256	21413	21413	13317	13317	71792	71792	65	1.9	92.48	3486
Rhodothermales bacterium	JAJEDR000000000	p16x33bins.37	Ircinia radix	Yes	Yes	No	d__Bacteria;p__Bacteroidota;c__Rhodothermia;o__Rhodothermales;f__Bin80;g__Bin80;s__	88.98	94.63	1.13	0	3388574	0	96	96	50805	50805	35297	35297	140959	140959	51.5	1.09	88.55	2845
Dehalococcoidia bacterium	JAJEDS000000000	p16x33bins.38	Ircinia radix	Yes	Yes	No	d__Bacteria;p__Chloroflexota;c__Dehalococcoidia;o__UBA3495;f__UBA3495;g__Bin22;s__	85.6	86.7	0.22	0	3239241	0	379	379	11013	11013	8546	8546	48589	48589	60.5	1.95	83.86	3323
Caldilineaceae bacterium	JAJEDT000000000	p16x33bins.39	Ircinia radix	No	Yes	No	d__Bacteria;p__Chloroflexota;c__Anaerolineae;o__Caldilineales;f__Caldilineaceae;g__Bin5;s__	78.62	92.27	2.73	50	4785293	0	315	315	22148	22148	15191	15191	75295	75295	61	1.75	87.13	4137
Candidatus Poribacteria bacterium	JAJEDU000000000	p16x33bins.42	Ircinia radix	Yes	Yes	No	d__Bacteria;p__Poribacteria;c__WGA-4E;o__WGA-4E;f__WGA-3G;g__;s__	85.44	96.44	2.2	0	4905262	0	103	103	72006	72006	47623	47623	247292	247292	41.8	1.04	88.35	4014
Anaerolineae bacterium	JAJEDV000000000	p16x33bins.47	Ircinia radix	No	Yes	No	d__Bacteria;p__Chloroflexota;c__Anaerolineae;o__SBR1031;f__A4b;g__UBA6055;s__	85.93	88.18	0.45	0	4293791	0	213	213	29098	29098	20158	20158	105076	105076	58.8	1.27	88.85	3820
Acidobacteria bacterium	JAJEDW000000000	p16x33bins.48	Ircinia radix	Yes	Yes	No	d__Bacteria;p__Acidobacteriota;c__Acidobacteriae;o__20CM-2-55-15;f__;g__;s__	71.19	88.29	3.42	25	3875248	0	351	351	14732	14732	11040	11040	51096	51096	67.4	1.58	91.76	3880
Nitrospirales bacterium	JAJEDX000000000	p16x33bins.5	Ircinia radix	No	Yes	Yes	d__Bacteria;p__Nitrospirota;c__Nitrospiria;o__Nitrospirales;f__UBA8639;g__Bin75;s__	78.43	97.73	3.86	0	2570326	0	39	39	86718	86718	65905	65905	298597	298597	56.6	1.54	87.61	2511
Candidatus Latescibacteria bacterium	JAJEDY000000000	p16x33bins.50	Ircinia radix	No	Yes	No	d__Bacteria;p__Latescibacterota;c__UBA2968;o__UBA2968;f__;g__;s__	95.2	96.7	0.3	0	5660424	0	101	101	77575	77575	56043	56043	240250	240250	51.1	1.45	92.51	5021
Acidimicrobiia bacterium	JAJEDZ000000000	p16x33bins.66	Ircinia radix	Yes	Yes	No	d__Bacteria;p__Actinobacteriota;c__Acidimicrobiia;o__Microtrichales;f__TK06;g__;s__	58.11	92.31	6.84	0	3032249	0	22	22	329248	329248	137829	137829	478891	478891	67.6	1.21	92.88	2694
Vicinamibacteria bacterium	JAJEEA000000000	p16x33bins.71	Ircinia radix	Yes	Yes	No	d__Bacteria;p__Acidobacteriota;c__Vicinamibacteria;o__Vicinamibacterales;f__UBA8438;g__UBA8438;s__	85.87	90.37	0.9	50	6621045	0	552	552	18133	18133	11994	11994	75928	75928	71.3	1.8	85.08	6009
Acidimicrobiia bacterium	JAJEEB000000000	p16x33bins.72	Ircinia radix	Yes	Yes	No	d__Bacteria;p__Actinobacteriota;c__Acidimicrobiia;o__UBA5794;f__SZUA-232;g__;s__	86.34	92.74	1.28	0	2851402	0	47	47	99422	99422	60668	60668	249010	249010	66.8	1.59	90.07	2633
Dehalococcoidia bacterium	JAJEEC000000000	p16x33bins.8	Ircinia radix	Yes	Yes	No	d__Bacteria;p__Chloroflexota;c__Dehalococcoidia;o__UBA1151;f__Bin127;g__Bin127;s__	85.45	85.45	0	0	1985603	0	271	271	8493	8493	7326	7326	32423	32423	56	1.19	91.6	2062
Alphaproteobacteria bacterium	JAJEED000000000	p16x34bins.1	Ircinia radix	Yes	Yes	No	d__Bacteria;p__Proteobacteria;c__Alphaproteobacteria;o__Bin65;f__Bin65;g__Bin65;s__	44.37	94.07	9.94	61.76	4216204	0	403	403	15533	15533	10462	10462	55907	55907	67.3	2.06	88.91	4280
Acidobacteria bacterium	JAJEEE000000000	p16x34bins.10	Ircinia radix	Yes	Yes	No	d__Bacteria;p__Acidobacteriota;c__Acidobacteriae;o__20CM-2-55-15;f__;g__;s__	82.88	96.58	2.74	0	4179646	0	89	89	88563	88563	46962	46962	254715	254715	67.2	1.78	91.08	3840
Candidatus Latescibacteria bacterium	JAJEEF000000000	p16x34bins.13	Ircinia radix	Yes	Yes	No	d__Bacteria;p__Latescibacterota;c__UBA2968;o__UBA2968;f__;g__;s__	93.01	94.51	0.3	0	5414992	0	132	132	60694	60694	41022	41022	240189	240189	50.8	1.32	92.15	4912
Candidatus Latescibacteria bacterium	JAJEEG000000000	p16x34bins.14	Ircinia radix	Yes	Yes	No	d__Bacteria;p__Latescibacterota;c__;o__;f__;g__;s__	97.8	97.8	0	0	3754487	0	7	7	2870129	2870129	536355	536355	2870129	2870129	62.4	1.12	90.88	3169
Acidimicrobiia bacterium	JAJEEH000000000	p16x34bins.22	Ircinia radix	Yes	Yes	No	d__Bacteria;p__Actinobacteriota;c__Acidimicrobiia;o__Microtrichales;f__Bin134;g__Bin134;s__	77.64	89.74	2.42	50	3277359	0	302	302	14659	14659	10852	10852	63014	63014	65.3	1.89	94.1	3321
Gemmatimonadetes bacterium	JAJEEI000000000	p16x34bins.23	Ircinia radix	No	Yes	No	d__Bacteria;p__Gemmatimonadota;c__Gemmatimonadetes;o__SG8-23;f__UBA6960;g__BD2-11;s__	76.91	87.91	2.2	0	3363593	0	83	83	64025	64025	40525	40525	150118	150118	68.7	0.96	92.08	2806
Gammaproteobacteria bacterium	JAJEEJ000000000	p16x34bins.24	Ircinia radix	Yes	Yes	Yes	d__Bacteria;p__Proteobacteria;c__Gammaproteobacteria;o__UBA6522;f__UBA6522;g__FEN-1219;s__	75.95	86.95	2.2	0	3866370	0	41	41	160977	160977	94301	94301	432218	432218	64.8	1.1	90.18	3331
Candidatus Poribacteria bacterium	JAJEEK000000000	p16x34bins.28	Ircinia radix	Yes	Yes	No	d__Bacteria;p__Poribacteria;c__WGA-4E;o__WGA-4E;f__WGA-3G;g__WGA-3G;s__	64.21	86.71	4.5	0	5144684	0	124	124	63272	63272	41489	41489	199627	199627	47.7	1.34	88.37	4408
Defluviicoccus sp.	JAJEEL000000000	p16x34bins.31	Ircinia radix	Yes	Yes	Yes	d__Bacteria;p__Proteobacteria;c__Alphaproteobacteria;o__Defluviicoccales;f__Defluviicoccaceae;g__Defluviicoccus;s__	97	99.5	0.5	0	5172654	0	220	220	41513	41513	23512	23512	121860	121860	67.9	1.51	90.29	5052
Gemmatimonadetes bacterium	JAJEEM000000000	p16x34bins.34	Ircinia radix	Yes	Yes	No	d__Bacteria;p__Gemmatimonadota;c__Gemmatimonadetes;o__;f__;g__;s__	78.01	94.51	3.3	0	3719015	0	78	78	74856	74856	47679	47679	235830	235830	69	1.22	93.06	3235
Gammaproteobacteria bacterium	JAJEEN000000000	p16x34bins.36	Ircinia radix	No	Yes	No	d__Bacteria;p__Proteobacteria;c__Gammaproteobacteria;o__UBA10353;f__LS-SOB;g__;s__	76.72	88.92	2.44	25	3538651	0	318	318	15245	15245	11127	11127	102742	102742	62.7	2.48	87.53	3524
Acidimicrobiia bacterium	JAJEEO000000000	p16x34bins.37	Ircinia radix	Yes	Yes	No	d__Bacteria;p__Actinobacteriota;c__Acidimicrobiia;o__Microtrichales;f__TK06;g__;s__	86.74	97.44	2.14	0	3280548	0	19	19	280975	280975	172660	172660	501322	501322	67.8	0.56	92.41	2942
Alphaproteobacteria bacterium	JAJEEP000000000	p16x34bins.43	Ircinia radix	Yes	Yes	No	d__Bacteria;p__Proteobacteria;c__Alphaproteobacteria;o__UBA828;f__UBA828;g__;s__	72.63	93.78	4.23	8.33	4656849	0	178	178	43227	43227	26162	26162	153007	153007	67.4	1.95	89.23	4354
Alphaproteobacteria bacterium	JAJEEQ000000000	p16x34bins.44	Ircinia radix	No	Yes	No	d__Bacteria;p__Proteobacteria;c__Alphaproteobacteria;o__UBA7887;f__GCA-2721365;g__;s__	78.9	85.1	1.24	0	3193818	0	122	122	43969	43969	26178	26178	183786	183786	66.4	1.84	86.13	3058
Candidatus Dadabacteria bacterium	JAJEER000000000	p16x34bins.45	Ircinia radix	No	Yes	No	d__Bacteria;p__Dadabacteria;c__UBA1144;o__;f__;g__;s__	83.15	95.75	2.52	33.33	1673790	0	28	28	73307	73307	59778	59778	270726	270726	51.3	1.52	91.19	1535
Rhodospirillales bacterium	JAJEES000000000	p16x34bins.47	Ircinia radix	No	Yes	No	d__Bacteria;p__Proteobacteria;c__Alphaproteobacteria;o__Rhodospirillales_A;f__;g__;s__	87.82	96.52	1.74	25	3793275	0	173	173	37746	37746	21926	21926	179570	179570	63.2	2.08	89.64	3678
Candidatus Poribacteria bacterium	JAJEET000000000	p16x34bins.5	Ircinia radix	Yes	Yes	No	d__Bacteria;p__Poribacteria;c__WGA-4E;o__WGA-4E;f__WGA-3G;g__WGA-3G;s__	74.81	94.21	3.88	0	5434924	0	163	163	47946	47946	33343	33343	152045	152045	47.6	1.26	88.41	4579
Vicinamibacteria bacterium	JAJEEU000000000	p16x34bins.50	Ircinia radix	Yes	Yes	No	d__Bacteria;p__Acidobacteriota;c__Vicinamibacteria;o__Vicinamibacterales;f__UBA8438;g__;s__	80.32	94.02	2.74	0	4230660	0	108	108	69663	69663	39172	39172	178019	178019	69.5	1.34	93.32	3690
Acidimicrobiia bacterium	JAJEEV000000000	p16x34bins.51	Ircinia radix	Yes	Yes	No	d__Bacteria;p__Actinobacteriota;c__Acidimicrobiia;o__Microtrichales;f__UBA11606;g__;s__	85.88	88.03	0.43	0	3403975	0	53	53	123397	123397	64225	64225	279984	279984	70.1	1.86	92.45	3161
Acidobacteria bacterium	JAJEEW000000000	p16x34bins.53	Ircinia radix	No	Yes	No	d__Bacteria;p__Acidobacteriota;c__Bin61;o__Bin61;f__Bin61;g__Bin61;s__	65.37	90.17	4.96	0	3509756	0	136	136	37555	37555	25807	25807	221218	221218	70	1.39	91.49	3027
Prochlorococcaceae cyanobacterium	JAJEEX000000000	p16x34bins.54	Ircinia radix	Yes	Yes	No	d__Bacteria;p__Cyanobacteria;c__Cyanobacteriia;o__Synechococcales;f__Cyanobiaceae;g__Synechococcus_B;s__	90.97	94.57	0.72	25	2493768	0	139	139	21772	21772	17940	17940	61481	61481	59.4	2.05	85.29	2955
Candidatus Binatia bacterium	JAJEEY000000000	p16x34bins.60	Ircinia radix	No	Yes	No	d__Bacteria;p__Binatota;c__Binatia;o__UBA9968;f__;g__;s__	78.58	89.08	2.1	0	4696570	0	218	218	43292	43292	21543	21543	130079	130079	65.7	1.87	88.24	4236
Candidatus Latescibacteria bacterium	JAJEEZ000000000	p16x34bins.62	Ircinia radix	No	Yes	No	d__Bacteria;p__Latescibacterota;c__UBA2968;o__UBA8231;f__GCA-002724215;g__GCA-2724215;s__	76.75	88.25	2.3	33.33	5007180	0	659	659	9139	9139	7598	7598	39501	39501	59.1	2.09	93.36	4811
Candidatus Binatia bacterium	JAJEFA000000000	p16x34bins.64	Ircinia radix	Yes	Yes	Yes	d__Bacteria;p__Binatota;c__Binatia;o__Bin18;f__Bin18;g__Bin18;s__	74.55	91.35	3.36	0	4626603	0	22	22	310963	310963	210300	210300	559633	559633	58	1.14	90.85	4557
Anaerolineae bacterium	JAJEFB000000000	p16x34bins.65	Ircinia radix	Yes	Yes	No	d__Bacteria;p__Chloroflexota;c__Anaerolineae;o__SBR1031;f__A4b;g__UBA6055;s__	91.82	91.82	0	0	4564101	0	53	53	153040	153040	86115	86115	312992	312992	56.6	1.5	89.13	3893
Vicinamibacteria bacterium	JAJEFC000000000	p16x34bins.66	Ircinia radix	Yes	Yes	No	d__Bacteria;p__Acidobacteriota;c__Vicinamibacteria;o__Vicinamibacterales;f__UBA8438;g__UBA8438;s__	68.86	92.36	4.7	0	6554762	0	441	441	21984	21984	14863	14863	119084	119084	71.3	1.63	84.42	5954
Dehalococcoidia bacterium	JAJEFD000000000	p16x34bins.71	Ircinia radix	Yes	Yes	No	d__Bacteria;p__Chloroflexota;c__Dehalococcoidia;o__UBA2963;f__UBA2963;g__Bin16;s__	97.69	97.69	0	0	2751126	0	19	19	236185	236185	144796	144796	504877	504877	66.5	0.91	90.67	2627
Gammaproteobacteria bacterium	JAJEFE000000000	p16x34bins.72	Ircinia radix	No	Yes	No	d__Bacteria;p__Proteobacteria;c__Gammaproteobacteria;o__UBA6522;f__UBA6522;g__;s__	63.63	85.38	4.35	0	4560666	0	169	169	56117	56117	26986	26986	202381	202381	63.1	1.92	90.13	4086
Thermoanaerobaculia bacterium	JAJEFF000000000	p16x34bins.9	Ircinia radix	No	Yes	No	d__Bacteria;p__Acidobacteriota;c__Thermoanaerobaculia;o__UBA5704;f__;g__;s__	82.1	90.65	1.71	0	4238389	0	27	27	258038	258038	156977	156977	1008499	1008499	68.8	0.65	94.26	3465
Rhodothermales bacterium	JAJEHV000000000	p16x63bins.1	Ircinia bocatorensis	Yes	Yes	Yes	d__Bacteria;p__Bacteroidota;c__Rhodothermia;o__Rhodothermales;f__Bin80;g__Bin80;s__	87.84	92.09	0.85	50	3570087	0	181	181	25963	25963	19724	19724	78622	78622	51.5	1.8	87.98	3082
Rhodospirillales bacterium	JAJEHW000000000	p16x63bins.20	Ircinia bocatorensis	No	Yes	No	d__Bacteria;p__Proteobacteria;c__Alphaproteobacteria;o__Rhodospirillales_A;f__;g__;s__	86.68	93.03	1.27	50	3587243	0	121	121	48907	48907	29646	29646	238801	238801	63	1.52	90.35	3444
Candidatus Latescibacteria bacterium	JAJEHX000000000	p16x63bins.21	Ircinia bocatorensis	Yes	Yes	No	d__Bacteria;p__Latescibacterota;c__;o__;f__;g__;s__	97.74	97.74	0	0	3861037	0	55	55	88942	88942	70200	70200	256288	256288	61.2	1.39	90.03	3324
Dehalococcoidia bacterium	JAJEHY000000000	p16x63bins.25	Ircinia bocatorensis	Yes	Yes	No	d__Bacteria;p__Chloroflexota;c__Dehalococcoidia;o__UBA1151;f__Bin127;g__Bin127;s__	92.05	92.05	0	0	2255392	0	143	143	19964	19964	15771	15771	74066	74066	56.1	1.09	91.1	2186
Caldilineaceae bacterium	JAJEHZ000000000	p16x63bins.29	Ircinia bocatorensis	No	Yes	No	d__Bacteria;p__Chloroflexota;c__Anaerolineae;o__Caldilineales;f__Caldilineaceae;g__Bin5;s__	85.9	95	1.82	50	4877803	0	198	198	37550	37550	24635	24635	169817	169817	60.9	1.75	87.14	4100
Dehalococcoidia bacterium	JAJEIA000000000	p16x63bins.3	Ircinia bocatorensis	Yes	Yes	No	d__Bacteria;p__Chloroflexota;c__Dehalococcoidia;o__UBA3495;f__UBA3495;g__Bin87;s__	78.77	88.67	1.98	0	3717185	0	164	164	43530	43530	22665	22665	109799	109799	63.6	0.97	87.72	3625
Nitrospirales bacterium	JAJEJG000000000	p16x63bins.32	Ircinia bocatorensis	Yes	Yes	Yes	d__Bacteria;p__Nitrospirota;c__Nitrospiria;o__Nitrospirales;f__UBA8639;g__Bin75;s__	88.57	97.67	1.82	0	2362088	0	24	24	215793	215793	98420	98420	426321	426321	57.1	1.1	87.74	2256
Acidimicrobiia bacterium	JAJEJF000000000	p16x63bins.43	Ircinia bocatorensis	Yes	Yes	No	d__Bacteria;p__Actinobacteriota;c__Acidimicrobiia;o__Microtrichales;f__TK06;g__;s__	77.36	92.31	2.99	0	3333816	0	225	225	27714	27714	14816	14816	111839	111839	67.7	1.33	92.63	3198
Candidatus Dadabacteria bacterium	JAJEJE000000000	p16x63bins.44	Ircinia bocatorensis	Yes	Yes	No	d__Bacteria;p__Dadabacteria;c__UBA1144;o__;f__;g__;s__	88.6	92.8	0.84	0	1632390	0	48	48	54822	54822	34008	34008	92480	92480	51.1	1.7	90.77	1546
bacterium	JAJEJD000000000	p16x63bins.49	Ircinia bocatorensis	Yes	Yes	No	d__Bacteria;p__UBA8248;c__UBA8248;o__UBA8248;f__UBA8248;g__Bin107;s__	89.54	93.79	0.85	0	3918824	0	32	32	290538	290538	122463	122463	709388	709388	60.5	1.59	86.37	3551
Dehalococcoidia bacterium	JAJEJC000000000	p16x63bins.52	Ircinia bocatorensis	Yes	Yes	Yes	d__Bacteria;p__Chloroflexota;c__Dehalococcoidia;o__Bin125;f__Bin125;g__Bin125;s__	88.78	93.73	0.99	0	2739548	0	10	10	494844	494844	273954	273954	529941	529941	65.8	0.41	91.96	2601
Acidimicrobiia bacterium	JAJEJB000000000	p16x63bins.58	Ircinia bocatorensis	Yes	Yes	No	d__Bacteria;p__Actinobacteriota;c__Acidimicrobiia;o__Microtrichales;f__UBA11606;g__;s__	85.05	91.45	1.28	0	3688547	0	59	59	109173	109173	62517	62517	241006	241006	68.8	1.4	92.66	3438
Candidatus Poribacteria bacterium	JAJEJA000000000	p16x63bins.62	Ircinia bocatorensis	Yes	Yes	No	d__Bacteria;p__Poribacteria;c__WGA-4E;o__WGA-4E;f__WGA-3G;g__;s__	85.54	96.54	2.2	0	5058983	0	123	123	67296	67296	41129	41129	195570	195570	41.8	1.09	88.38	4127
Silicimonas sp.	JAJEIZ000000000	p16x63bins.68	Ircinia bocatorensis	No	Yes	No	d__Bacteria;p__Proteobacteria;c__Alphaproteobacteria;o__Rhodobacterales;f__Rhodobacteraceae;g__Silicimonas;s__	61	85.7	4.94	46.15	4001422	0	244	244	25357	25357	16399	16399	109440	109440	60.6	1.52	86.99	3996
Acidobacteria bacterium	JAJEIY000000000	p16x63bins.69	Ircinia bocatorensis	Yes	Yes	No	d__Bacteria;p__Acidobacteriota;c__Bin61;o__Bin61;f__Bin61;g__Bin61;s__	86.48	91.03	0.91	0	3570990	0	93	93	79560	79560	38397	38397	232958	232958	69.5	1.34	90.35	2967
Bryobacterales bacterium	JAJEIX000000000	p16x63bins.70	Ircinia bocatorensis	No	Yes	No	d__Bacteria;p__Acidobacteriota;c__Acidobacteriae;o__Bryobacterales;f__UBA6623;g__;s__	75.02	96.37	4.27	0	6358836	0	315	315	35220	35220	20186	20186	140726	140726	64.1	1.96	87.48	5327
Acidimicrobiia bacterium	JAJEIW000000000	p16x63bins.71	Ircinia bocatorensis	Yes	Yes	No	d__Bacteria;p__Actinobacteriota;c__Acidimicrobiia;o__Microtrichales;f__TK06;g__;s__	76.47	85.47	1.8	0	3014199	0	314	314	13031	13031	9599	9599	52382	52382	66.9	1.87	90.58	3146
Alphaproteobacteria bacterium	JAJEIV000000000	p16x63bins.72	Ircinia bocatorensis	No	Yes	No	d__Bacteria;p__Proteobacteria;c__Alphaproteobacteria;o__Bin65;f__Bin65;g__Bin65;s__	91.91	96.96	1.01	66.67	3941777	0	89	89	71254	71254	44289	44289	239686	239686	67.6	1.38	88.62	3692
Candidatus Poribacteria bacterium	JAJEIU000000000	p16x63bins.74	Ircinia bocatorensis	Yes	Yes	No	d__Bacteria;p__Poribacteria;c__WGA-4E;o__WGA-4E;f__WGA-3G;g__WGA-3G;s__	78.84	95.34	3.3	0	5541858	0	86	86	110015	110015	64440	64440	337746	337746	47.9	1.29	88.51	4700
Dehalococcoidia bacterium	JAJEIT000000000	p16x63bins.9	Ircinia bocatorensis	Yes	Yes	No	d__Bacteria;p__Chloroflexota;c__Dehalococcoidia;o__UBA2991;f__UBA2991;g__UBA2991;s__	87.9	93.4	1.1	50	2848629	0	99	99	45887	45887	28774	28774	129785	129785	69	1.62	91.83	2952
Gammaproteobacteria bacterium	JAJEIS000000000	p16x65bins.1	Ircinia bocatorensis	No	Yes	Yes	d__Bacteria;p__Proteobacteria;c__Gammaproteobacteria;o__UBA6522;f__UBA6522;g__FEN-1219;s__	74.1	87.3	2.64	0	3850381	0	26	26	332015	332015	148091	148091	592639	592639	64.7	1.19	90.21	3339
Anaerolineae bacterium	JAJEIR000000000	p16x65bins.10	Ircinia bocatorensis	No	Yes	No	d__Bacteria;p__Chloroflexota;c__Anaerolineae;o__SBR1031;f__A4b;g__UBA6055;s__	86.36	90.91	0.91	0	4064547	0	138	138	54143	54143	29453	29453	267501	267501	59.5	1.54	89.35	3626
Pseudomonadales bacterium	JAJEIQ000000000	p16x65bins.14	Ircinia bocatorensis	Yes	Yes	Yes	d__Bacteria;p__Proteobacteria;c__Gammaproteobacteria;o__Pseudomonadales;f__HTCC2089;g__UBA2168;s__	73.67	88.47	2.96	0	4441236	0	81	81	86096	86096	54830	54830	245883	245883	64.5	1.35	93.02	3964
Candidatus Poribacteria bacterium	JAJEIP000000000	p16x65bins.2	Ircinia bocatorensis	Yes	Yes	No	d__Bacteria;p__Poribacteria;c__WGA-4E;o__WGA-4E;f__WGA-3G;g__WGA-3G;s__	73.44	95.44	4.4	0	5128027	0	148	148	53950	53950	34648	34648	207610	207610	48.6	1.39	89.26	4447
Candidatus Latescibacteria bacterium	JAJEIO000000000	p16x65bins.25	Ircinia bocatorensis	Yes	Yes	No	d__Bacteria;p__Latescibacterota;c__UBA2968;o__UBA8231;f__GCA-002724215;g__GCA-2724215;s__	80.24	97.74	3.5	0	5841050	0	64	64	139150	139150	91266	91266	381307	381307	59	1.12	93.75	4968
Anaerolineae bacterium	JAJEIN000000000	p16x65bins.28	Ircinia bocatorensis	No	Yes	No	d__Bacteria;p__Chloroflexota;c__Anaerolineae;o__SBR1031;f__A4b;g__UBA6055;s__	90.91	90.91	0	0	4320518	0	140	140	50848	50848	30860	30860	149885	149885	58.7	1.33	88.88	3763
Acidimicrobiia bacterium	JAJEIM000000000	p16x65bins.30	Ircinia bocatorensis	No	Yes	No	d__Bacteria;p__Actinobacteriota;c__Acidimicrobiia;o__UBA5794;f__SZUA-232;g__;s__	84.98	91.88	1.38	0	2756480	0	43	43	95154	95154	64104	64104	163728	163728	66.9	0.93	90.09	2548
Alphaproteobacteria bacterium	JAJEIL000000000	p16x65bins.31	Ircinia bocatorensis	No	Yes	No	d__Bacteria;p__Proteobacteria;c__Alphaproteobacteria;o__UBA7887;f__GCA-2721365;g__;s__	80.85	92.05	2.24	0	3719390	0	101	101	122357	122357	36825	36825	275208	275208	66.5	1.99	85.93	3475
Gammaproteobacteria bacterium	JAJEIK000000000	p16x65bins.33	Ircinia bocatorensis	Yes	Yes	No	d__Bacteria;p__Proteobacteria;c__Gammaproteobacteria;o__UBA4486;f__UBA4486;g__;s__	62.4	85.6	4.64	20	3375943	0	325	325	13817	13817	10387	10387	52998	52998	56.8	2.7	92.74	3258
Acidimicrobiia bacterium	JAJEIJ000000000	p16x65bins.37	Ircinia bocatorensis	Yes	Yes	No	d__Bacteria;p__Actinobacteriota;c__Acidimicrobiia;o__Microtrichales;f__Bin134;g__Bin134;s__	88.47	94.87	1.28	0	3689276	0	53	53	103073	103073	69608	69608	263626	263626	64.8	1.28	93.68	3467
Prochlorococcaceae cyanobacterium	JAJEII000000000	p16x65bins.39	Ircinia bocatorensis	Yes	Yes	No	d__Bacteria;p__Cyanobacteria;c__Cyanobacteriia;o__Synechococcales;f__Cyanobiaceae;g__Synechococcus_B;s__	85.04	90.49	1.09	25	2270490	0	171	171	19186	19186	13277	13277	59915	59915	59.9	2.12	84.47	2657
Alphaproteobacteria bacterium	JAJEIH000000000	p16x65bins.40	Ircinia bocatorensis	No	Yes	Yes	d__Bacteria;p__Proteobacteria;c__Alphaproteobacteria;o__Bin95;f__Bin95;g__Bin95;s__	92.31	98.51	1.24	0	4307412	0	167	167	42335	42335	25792	25792	233965	233965	68.6	1.87	89.84	4233
Candidatus Binatia bacterium	JAJEIG000000000	p16x65bins.41	Ircinia bocatorensis	No	Yes	Yes	d__Bacteria;p__Binatota;c__Binatia;o__Bin18;f__Bin18;g__Bin18;s__	69.51	90.51	4.2	0	4678431	0	82	82	119828	119828	57054	57054	382728	382728	58.1	1.65	90.74	4614
Defluviicoccus sp.	JAJEIF000000000	p16x65bins.48	Ircinia bocatorensis	No	Yes	No	d__Bacteria;p__Proteobacteria;c__Alphaproteobacteria;o__Defluviicoccales;f__Defluviicoccaceae;g__Defluviicoccus;s__	69.17	90.92	4.35	6.25	4861842	0	576	576	11503	11503	8440	8440	42292	42292	68.1	1.71	91.07	5132
Candidatus Poribacteria bacterium	JAJEIE000000000	p16x65bins.49	Ircinia bocatorensis	Yes	Yes	No	d__Bacteria;p__Poribacteria;c__WGA-4E;o__WGA-4E;f__WGA-3G;g__WGA-3G;s__	74.44	96.44	4.4	0	5019702	0	41	41	202675	202675	122431	122431	577092	577092	48.2	0.83	89.34	4271
Candidatus Latescibacteria bacterium	JAJEID000000000	p16x65bins.5	Ircinia bocatorensis	Yes	Yes	No	d__Bacteria;p__Latescibacterota;c__UBA2968;o__UBA2968;f__;g__;s__	95.2	96.7	0.3	0	5314724	0	108	108	95605	95605	49210	49210	203756	203756	51.3	1.51	92.67	4702
Silicimonas sp.	JAJEIC000000000	p16x65bins.51	Ircinia bocatorensis	Yes	Yes	Yes	d__Bacteria;p__Proteobacteria;c__Alphaproteobacteria;o__Rhodobacterales;f__Rhodobacteraceae;g__Silicimonas;s__	77.66	88.31	2.13	27.27	4729965	0	124	124	72376	72376	38144	38144	201593	201593	60.9	1.46	86.63	4543
Chloroflexi bacterium	JAJEIB000000000	p16x65bins.53	Ircinia bocatorensis	No	Yes	No	d__Bacteria;p__Chloroflexota_B;c__UBA11872;o__UBA11872;f__UBA11872;g__;s__	62.33	86.73	4.88	40	3347321	0	132	132	39821	39821	25358	25358	157776	157776	65.7	1.56	87.92	3241
Chloroflexi bacterium	JAJDZD000000000	jk18x40bins.16	Ircinia strobilina	Yes	Yes	No	d__Bacteria;p__Chloroflexota_B;c__UBA11872;o__UBA11872;f__UBA11872;g__;s__	88.96	88.96	0	0	3520625	0	80	80	71754	71754	44007	44007	264383	264383	65.6	1.53	88.95	3313
Acidimicrobiia bacterium	JAJDZE000000000	jk18x40bins.18	Ircinia strobilina	Yes	Yes	No	d__Bacteria;p__Actinobacteriota;c__Acidimicrobiia;o__Microtrichales;f__TK06;g__;s__	79.92	94.87	2.99	0	3690492	0	211	211	29235	29235	17490	17490	77063	77063	67.3	1.75	90.74	3497
Candidatus Poribacteria bacterium	JAJDZF000000000	jk18x40bins.22	Ircinia strobilina	No	Yes	No	d__Bacteria;p__Poribacteria;c__WGA-4E;o__WGA-4E;f__WGA-3G;g__;s__	80.73	97.58	3.37	0	4556110	0	220	220	31121	31121	20709	20709	153239	153239	40.2	1.4	86.41	3885
Dehalococcoidia bacterium	JAJDZG000000000	jk18x40bins.26	Ircinia strobilina	Yes	Yes	No	d__Bacteria;p__Chloroflexota;c__Dehalococcoidia;o__Bin125;f__Bin125;g__Bin125;s__	71.95	91.75	3.96	0	2350498	0	171	171	20327	20327	13745	13745	65850	65850	65.7	1.33	91.96	2339
Thermoanaerobaculia bacterium	JAJDZH000000000	jk18x40bins.27	Ircinia strobilina	Yes	Yes	No	d__Bacteria;p__Acidobacteriota;c__Thermoanaerobaculia;o__UBA5704;f__;g__;s__	52.45	91.45	7.8	30.77	3728583	0	490	490	9429	9429	7609	7609	106905	106905	68.9	1.58	93.1	3428
Nitrospirales bacterium	JAJDZI000000000	jk18x40bins.30	Ircinia strobilina	Yes	Yes	Yes	d__Bacteria;p__Nitrospirota;c__Nitrospiria;o__Nitrospirales;f__UBA8639;g__Bin75;s__	68.56	91.31	4.55	20	2315678	0	151	151	19262	19262	15335	15335	49235	49235	56.5	1.78	88.39	2360
Caldilineaceae bacterium	JAJDZJ000000000	jk18x40bins.35	Ircinia strobilina	Yes	Yes	No	d__Bacteria;p__Chloroflexota;c__Anaerolineae;o__Caldilineales;f__Caldilineaceae;g__Bin5;s__	85.9	95	1.82	50	5234969	0	243	243	32011	32011	21543	21543	98794	98794	60.5	1.66	85.99	4586
Acidobacteria bacterium	JAJDZK000000000	jk18x40bins.40	Ircinia strobilina	Yes	Yes	No	d__Bacteria;p__Acidobacteriota;c__Bin61;o__Bin61;f__Bin61;g__Bin61;s__	80.77	89.32	1.71	0	3651323	0	130	130	49342	49342	28087	28087	186994	186994	69.4	1.14	90.86	3091
Gammaproteobacteria bacterium	JAJDZL000000000	jk18x40bins.47	Ircinia strobilina	Yes	Yes	Yes	d__Bacteria;p__Proteobacteria;c__Gammaproteobacteria;o__UBA10353;f__UBA5680;g__;s__	81.1	89.5	1.68	100	2615778	0	263	263	12991	12991	9945	9945	51676	51676	51.2	1.72	88.12	2544
Candidatus Binatia bacterium	JAJDZM000000000	jk18x40bins.50	Ircinia strobilina	Yes	Yes	No	d__Bacteria;p__Binatota;c__Binatia;o__Bin18;f__Bin18;g__Bin18;s__	68.72	87.62	3.78	16.67	4983416	0	308	308	23274	23274	16179	16179	88090	88090	57.8	1.89	90.31	5187
Bryobacterales bacterium	JAJDZN000000000	jk18x40bins.51	Ircinia strobilina	Yes	Yes	No	d__Bacteria;p__Acidobacteriota;c__Acidobacteriae;o__Bryobacterales;f__UBA6623;g__;s__	58.77	94.02	7.05	0	6183665	0	341	341	31207	31207	18133	18133	104094	104094	63.9	2.04	87.95	5247
Acidimicrobiia bacterium	JAJDZO000000000	jk18x40bins.8	Ircinia strobilina	Yes	Yes	No	d__Bacteria;p__Actinobacteriota;c__Acidimicrobiia;o__Microtrichales;f__UBA11606;g__;s__	75.96	86.66	2.14	33.33	3203889	0	410	410	9679	9679	7814	7814	31338	31338	68.1	1.71	91.05	3182
Candidatus Poribacteria bacterium	JAJDZP000000000	jk18x40bins.9	Ircinia strobilina	No	Yes	No	d__Bacteria;p__Poribacteria;c__WGA-4E;o__WGA-4E;f__WGA-3G;g__WGA-3G;s__	68.14	96.54	5.68	0	4992507	0	38	38	179105	179105	131381	131381	600851	600851	48.3	0.58	89.58	4264
Anaerolineae bacterium	JAJDZQ000000000	jk18x44bins.10	Ircinia strobilina	Yes	Yes	No	d__Bacteria;p__Chloroflexota;c__Anaerolineae;o__SBR1031;f__A4b;g__UBA6055;s__	82.29	89.09	1.36	50	3460863	0	186	186	27425	27425	18606	18606	139291	139291	59.7	1.18	90.93	3096
Chloroflexi bacterium	JAJDZR000000000	jk18x44bins.5	Ircinia strobilina	Yes	Yes	No	d__Bacteria;p__Chloroflexota;c__UBA2235;o__UBA12225;f__;g__;s__	86.63	92.28	1.13	0	4088927	0	340	340	16657	16657	12026	12026	52150	52150	65.4	1.46	87.7	3977
Candidatus Latescibacteria bacterium	JAJDZS000000000	jk18x44bins.8	Ircinia strobilina	No	Yes	No	d__Bacteria;p__Latescibacterota;c__UBA2968;o__UBA2968;f__;g__;s__	87.51	89.01	0.3	0	5050807	0	224	224	30853	30853	22548	22548	104865	104865	50.7	1.32	91.66	4684
		GCA_011087605.1_ASM1108760v1	Mycale hentscheli	No	Yes	No	d__Bacteria;p__Proteobacteria;c__Alphaproteobacteria;o__Rhizobiales;f__Rhizobiaceae;g__R2A130;s__	95.86	97.51	0.33	0	4192478	300	177	180	36675	33351	23686	23289	110260	110260	52.7	1.22	90.63	4016
		GCA_011087615.1_ASM1108761v1	Mycale hentscheli	No	Yes	No	d__Bacteria;p__Proteobacteria;c__Gammaproteobacteria;o__HK1;f__;g__;s__	60.89	89.74	5.77	0	5832671	540	264	273	31183	30432	22093	21363	159945	159945	58.2	2	86.01	5978
		GCA_011087645.1_ASM1108764v1	Mycale hentscheli	No	Yes	No	d__Bacteria;p__Proteobacteria;c__Alphaproteobacteria;o__UBA6615;f__UBA6615;g__;s__	97.85	100	0.43	0	3888323	10	28	29	239453	225171	138868	134079	472259	472259	60.4	0.89	90.16	3710
		GCA_011087765.1_ASM1108776v1	Mycale hentscheli	No	Yes	No	d__Bacteria;p__Planctomycetota;c__Planctomycetes;o__Pirellulales;f__Pirellulaceae;g__Mariniblastus;s__	81.27	87.52	1.25	50	4759856	14820	371	539	18991	13365	12829	8803	92914	62018	48.2	1.24	85.26	3823
		GCA_011087845.1_ASM1108784v1	Mycale hentscheli	No	Yes	No	d__Bacteria;p__Bacteroidota;c__Bacteroidia;o__Flavobacteriales;f__Flavobacteriaceae;g__SCGC-AAA160-P02;s__	85.47	90.77	1.06	0	3105764	130	233	237	18305	18194	13329	13103	81769	81769	34.2	2.09	86.79	3079
		GCA_011087905.1_ASM1108790v1	Mycale hentscheli	No	Yes	No	d__Bacteria;p__Cyanobacteria;c__Cyanobacteriia;o__Synechococcales;f__Cyanobiaceae;g__Synechococcus_C;s__Synechococcus_C sp000230675	85.06	85.96	0.18	0	2021302	2689	133	169	20249	17643	15197	11944	90737	67821	55.7	3.09	90.57	2304
		GCA_011087945.1_ASM1108794v1	Mycale hentscheli	No	Yes	No	d__Bacteria;p__Proteobacteria;c__Alphaproteobacteria;o__Rhodobacterales;f__Rhodobacteraceae;g__;s__	96.05	96.05	0	0	3573728	100	163	164	29577	29577	21924	21790	141079	141079	61.5	1.86	89.83	3785
		GCA_011088095.1_ASM1108809v1	Mycale hentscheli	No	Yes	No	d__Bacteria;p__Proteobacteria;c__Gammaproteobacteria;o__UBA4575;f__UBA4575;g__;s__	91.17	94.37	0.64	0	2602275	570	33	54	136416	109579	78856	48179	648140	351750	39.5	1.16	89.64	2714
		GCA_011088105.1_ASM1108810v1	Mycale hentscheli	No	Yes	No	d__Bacteria;p__Nitrospirota;c__Nitrospiria;o__Nitrospirales;f__UBA8639;g__;s__	91	95.55	0.91	0	2595516	30	70	73	65867	65867	37078	35554	139627	137014	48.2	1.3	87.2	2580
		GCA_011088215.1_ASM1108821v1	Mycale hentscheli	No	Yes	No	d__Bacteria;p__Proteobacteria;c__Alphaproteobacteria;o__Sphingomonadales;f__Kordiimonadaceae;g__GCA-2401685;s__	91.3	95.65	0.87	0	4008112	266	147	159	40813	38060	27266	25206	140483	133275	51.2	1.57	90.2	3838
		GCA_011088225.1_ASM1108822v1	Mycale hentscheli	No	Yes	No	d__Bacteria;p__Acidobacteriota;c__UBA890;o__UBA890;f__;g__;s__	83.7	92.25	1.71	0	4820728	365	132	144	52724	49606	36520	33474	185598	185598	64.2	0.96	93.35	4264
		GCA_011088265.1_ASM1108826v1	Mycale hentscheli	No	Yes	No	d__Bacteria;p__Proteobacteria;c__Gammaproteobacteria;o__UBA10353;f__LS-SOB;g__;s__	85.79	96.44	2.13	14.29	4173061	4313	317	373	19362	16998	13164	11176	165452	107475	46.2	1.48	85.43	4155
		GCA_011088285.1_ASM1108828v1	Mycale hentscheli	No	Yes	No	d__Bacteria;p__Verrucomicrobiota;c__Kiritimatiellae;o__;f__;g__;s__	85.81	93.41	1.52	0	2711186	799	311	341	10838	10705	8717	7948	64499	45817	43.7	1.51	86.85	2935
		GCA_900143525.1	Spongia spongia	No	Yes	No	d__Bacteria;p__Proteobacteria;c__Alphaproteobacteria;o__Rhodobacterales;f__Rhodobacteraceae;g__Ruegeria;s__Ruegeria sp900143525	98.7	99.25	0.11	0	4922849	0	35	35	290461	290461	140652	140652	917259	917259	56.5	2.9	89.5	4866
		GCA_900143535.1	Spongia spongia	No	Yes	No	d__Bacteria;p__Proteobacteria;c__Alphaproteobacteria;o__Rhodobacterales;f__Rhodobacteraceae;g__Tateyamaria;s__Tateyamaria sp900143535	95.68	99.68	0.8	0	4506054	0	39	39	272279	272279	115539	115539	740553	740553	57.4	3.66	89.58	4478
		GCA_900143545.1	Spongia spongia	No	Yes	No	d__Bacteria;p__Proteobacteria;c__Alphaproteobacteria;o__Rhodobacterales;f__Rhodobacteraceae;g__Yoonia;s__Yoonia sp900143545	97.94	99.09	0.23	33.33	3914133	0	15	15	587906	587906	260942	260942	717567	717567	56.8	3.52	91.44	3927
		GCA_900143555.1	Spongia spongia	No	Yes	No	d__Bacteria;p__Proteobacteria;c__Alphaproteobacteria;o__Rhizobiales;f__Stappiaceae;g__Labrenzia;s__Labrenzia alba	96.53	99.68	0.63	0	7393951	17	24	24	657429	657429	308081	308080	1253412	1253412	56.3	3.9	88.44	6854
		GCA_900143565.1	Spongia spongia	No	Yes	No	d__Bacteria;p__Proteobacteria;c__Alphaproteobacteria;o__Rhizobiales;f__Stappiaceae;g__Pseudovibrio;s__Pseudovibrio sp900143565	99.69	99.94	0.05	0	5963068	0	26	26	437146	437146	229348	229348	1273068	1273068	51.3	2.21	86.6	5378
		GCA_900143615.1	Spongia spongia	No	Yes	No	d__Bacteria;p__Proteobacteria;c__Alphaproteobacteria;o__Rhodobacterales;f__Rhodobacteraceae;g__Shimia;s__Shimia sp900143615	97.65	99.25	0.32	0	4538961	0	10	10	804568	804568	453896	453896	1118318	1118318	55	3.95	90.09	4301
		GCA_900143635.1	Spongia spongia	No	Yes	No	d__Bacteria;p__Proteobacteria;c__Alphaproteobacteria;o__Rhodobacterales;f__Rhodobacteraceae;g__FREY01;s__FREY01 sp900143635	97.6	99.2	0.32	0	4809428	0	29	29	472120	472120	165842	165842	750389	750389	59.6	3.34	89.29	4575
		GCA_900149685.1	Spongia spongia	No	Yes	No	d__Bacteria;p__Proteobacteria;c__Alphaproteobacteria;o__Sphingomonadales;f__Sphingomonadaceae;g__Erythrobacter;s__Erythrobacter sp900149685	98.74	99.59	0.17	0	3137103	0	2	2	3131738	3131738	1568551	1568551	3131738	3131738	56.2	8.08	91.92	2972
		GCA_900149695.1	Spongia spongia	No	Yes	No	d__Bacteria;p__Proteobacteria;c__Alphaproteobacteria;o__Rhizobiales;f__Anderseniellaceae;g__Anderseniella;s__Anderseniella sp900149695	98.9	100	0.22	0	4613965	0	8	8	2658047	2658047	576745	576745	2658047	2658047	57.9	4.72	90.11	4430
		GCA_900149705.1	Spongia spongia	No	Yes	No	d__Bacteria;p__Proteobacteria;c__Alphaproteobacteria;o__Sphingomonadales;f__Sphingomonadaceae;g__Sphingorhabdus;s__Sphingorhabdus sp900149705	95.19	99.14	0.79	0	3622901	0	2	2	3616401	3616401	1811450	1811450	3616401	3616401	52.8	5.78	91.65	3498
		GCA_002696985.1_ASM269698v1	Tara Oceans North Atlantic	No	Yes	No	d__Bacteria;p__Bacteroidota;c__Bacteroidia;o__Flavobacteriales;f__Flavobacteriaceae;g__Mesonia;s__Mesonia sp002413625	85.95	94.3	1.67	50	3898638	3111	54	54	115221	115035	72197	72139	314224	313725	35.1	4.57	90.11	3567
		GCA_002697205.1_ASM269720v1	Tara Oceans North Atlantic	No	Yes	No	d__Bacteria;p__Proteobacteria;c__Gammaproteobacteria;o__Pseudomonadales;f__HTCC2089;g__GCA-2697205;s__GCA-2697205 sp002697205	69.34	85.84	3.3	61.11	3981412	43292	160	160	30611	30099	24883	24613	94495	93124	49.5	2.95	88.79	3675
		GCA_002697225.1_ASM269722v1	Tara Oceans North Atlantic	No	Yes	No	d__Bacteria;p__Poribacteria;c__WGA-4E;o__WGA-4E;f__UBA9662;g__UBA9662;s__UBA9662 sp002697225	71.85	88.85	3.4	100	4167435	35105	168	168	28622	28411	24806	24597	134812	133653	41.9	1.24	88.6	3580
		GCA_002697245.1_ASM269724v1	Tara Oceans North Atlantic	No	Yes	No	d__Bacteria;p__Proteobacteria;c__Alphaproteobacteria;o__Rhodobacterales;f__Rhodobacteraceae;g__Thioclava;s__Thioclava sediminum	80.08	98.33	3.65	25	4114335	138	70	70	94382	94382	58776	58774	283883	283883	63.7	4.98	90.27	3933
		GCA_002697285.1_ASM269728v1	Tara Oceans North Atlantic	No	Yes	No	d__Bacteria;p__Poribacteria;c__WGA-4E;o__WGA-4E;f__UBA9662;g__TMED15;s__TMED15 sp002714785	71.64	95.44	4.76	50	4242771	28650	122	123	44479	44189	34776	34261	106655	105965	40.4	1.28	86.98	3479
		GCA_002697375.1_ASM269737v1	Tara Oceans North Atlantic	No	Yes	No	d__Bacteria;p__Proteobacteria;c__Gammaproteobacteria;o__Pseudomonadales;f__Pseudomonadaceae;g__Pseudomonas_D;s__Pseudomonas_D pachastrellae	84.9	96.1	2.24	0	4245982	1053	77	77	90425	90264	55142	55128	236406	236406	61.2	2.84	90.25	4009
		GCA_002697445.1_ASM269744v1	Tara Oceans North Atlantic	No	Yes	No	d__Bacteria;p__Bacteroidota;c__Rhodothermia;o__Rhodothermales;f__Rubricoccaceae;g__Rubrivirga;s__Rubrivirga sp002283555	55.19	97.54	8.47	73.68	4968344	5593	69	69	131994	131748	72004	71923	396638	396165	71.3	1.87	90.94	4310
		GCA_002697625.1_ASM269762v1	Tara Oceans North Atlantic	No	Yes	No	d__Bacteria;p__Bacteroidota;c__Bacteroidia;o__Flavobacteriales;f__BACL11;g__GCA-002697625;s__GCA-002697625 sp002697625	83.95	92	1.61	0	1664267	8616	53	53	44351	44162	31401	31238	97102	96910	30.8	2.04	95.67	1530
		GCA_002697735.1_ASM269773v1	Tara Oceans North Atlantic	No	Yes	No	d__Bacteria;p__Proteobacteria;c__Gammaproteobacteria;o__Pseudomonadales;f__Halomonadaceae;g__Halomonas;s__Halomonas sp003045775	92.01	97.41	1.08	0	4946673	205	88	88	76478	76478	56212	56209	326312	326302	63.9	1.83	87.41	4226
		GCA_002697745.1_ASM269774v1	Tara Oceans North Atlantic	No	Yes	No	d__Bacteria;p__Proteobacteria;c__Alphaproteobacteria;o__Rhizobiales;f__Rhizobiaceae;g__Nitratireductor;s__Nitratireductor sp002697745	87.87	96.12	1.65	12.5	4326382	69	68	68	122625	122625	63623	63622	316157	316157	60.3	1.43	90.53	4148
		GCA_002697785.1_ASM269778v1	Tara Oceans North Atlantic	No	Yes	No	d__Bacteria;p__Proteobacteria;c__Alphaproteobacteria;o__Rhodobacterales;f__Rhodobacteraceae;g__Albimonas;s__Albimonas donghaensis	95.45	97.6	0.43	55.56	5201795	597	71	71	170517	170508	73264	73256	456168	456138	70.9	6.95	85.42	4386
		GCA_002697805.1_ASM269780v1	Tara Oceans North Atlantic	No	Yes	No	d__Bacteria;p__Proteobacteria;c__Alphaproteobacteria;o__Micavibrionales;f__TMED2;g__TMED2;s__TMED2 sp002168225	96.98	99.13	0.43	0	3972912	500	43	43	2086245	2086245	92393	92381	2086245	2086245	55.2	15.68	91.25	3734
		GCA_002697965.1_ASM269796v1	Tara Oceans North Atlantic	No	Yes	No	d__Bacteria;p__Actinobacteriota;c__Acidimicrobiia;o__Microtrichales;f__MedAcidi-G1;g__MedAcidi-G1;s__MedAcidi-G1 sp002713545	53.35	90.6	7.45	92.31	1962157	8171	78	78	28641	28536	25155	25051	109333	109131	42.6	1.24	95.31	1982
		GCA_002698075.1_ASM269807v1	Tara Oceans North Atlantic	No	Yes	No	d__Bacteria;p__Proteobacteria;c__Alphaproteobacteria;o__Puniceispirillales;f__AAA536-G10;g__AG-426-I14;s__AG-426-I14 sp003213175	74.14	86.84	2.54	62.5	2115656	11000	88	88	25929	25848	24041	23916	132743	132067	29.9	4.42	95.02	2195
		GCA_002698125.1_ASM269812v1	Tara Oceans North Atlantic	No	Yes	No	d__Bacteria;p__Actinobacteriota;c__Acidimicrobiia;o__Microtrichales;f__TK06;g__UBA7388;s__UBA7388 sp002470695	62.7	96.15	6.69	10.53	2633695	15108	50	50	98356	97775	52673	52371	241281	240174	50.9	8.97	93.96	2603
		GCA_002698235.1_ASM269823v1	Tara Oceans North Atlantic	No	Yes	No	d__Bacteria;p__Marinisomatota;c__Marinisomatia;o__Marinisomatales;f__UBA1611;g__GCA-002718655;s__GCA-002718655 sp002698235	83.71	89.21	1.1	0	1937208	21509	84	84	29120	28606	23062	22805	69519	68703	36	2.4	95.81	1757
		GCA_002698425.1_ASM269842v1	Tara Oceans North Atlantic	No	Yes	No	d__Bacteria;p__Proteobacteria;c__Alphaproteobacteria;o__Rhizobiales;f__Rhizobiaceae;g__Ahrensia;s__Ahrensia sp002698425	66.27	97.57	6.26	4.17	5696658	420	120	120	69816	69747	47472	47468	260965	260957	63.3	3.31	90.14	5483
		GCA_002698505.1_ASM269850v1	Tara Oceans North Atlantic	No	Yes	No	d__Bacteria;p__Cyanobacteria;c__Cyanobacteriia;o__Synechococcales;f__Cyanobiaceae;g__Synechococcus_C;s__Synechococcus_C sp002698505	72.28	91.98	3.94	95	2213321	7731	73	73	39340	39206	30319	30213	130990	130641	58.9	2.16	89.79	2471
		GCA_002698575.1_ASM269857v1	Tara Oceans North Atlantic	No	Yes	No	d__Bacteria;p__Actinobacteriota;c__Actinobacteria;o__Propionibacteriales;f__Nocardioidaceae;g__Nocardioides;s__Nocardioides sp002698575	52.12	87.72	7.12	3.7	4316983	771	199	199	26474	26474	21693	21689	99057	99035	70.8	2.5	91.57	4140
		GCA_002698705.1_ASM269870v1	Tara Oceans North Atlantic	No	Yes	No	d__Bacteria;p__Bacteroidota;c__Bacteroidia;o__Flavobacteriales;f__Flavobacteriaceae;g__UBA3537;s__UBA3537 sp002698705	54.41	85.66	6.25	67.39	1767573	4138	48	48	50973	50866	36824	36738	128638	128308	33.1	2.18	94.5	1648
		GCA_002698765.1_ASM269876v1	Tara Oceans North Atlantic	No	Yes	No	d__Bacteria;p__Marinisomatota;c__Marinisomatia;o__Marinisomatales;f__TCS55;g__GCA-002701945;s__	44.51	88.46	8.79	55.56	1988880	6958	76	76	34981	34903	26169	26077	133314	132738	32.5	2.33	96.28	1805
		GCA_002698785.1_ASM269878v1	Tara Oceans North Atlantic	No	Yes	No	d__Bacteria;p__Verrucomicrobiota;c__Verrucomicrobiae;o__Verrucomicrobiales;f__DEV007;g__Arctic95D-9;s__Arctic95D-9 sp002698785	63.7	100	7.26	6.67	7015219	3	60	60	230483	230483	116920	116920	810364	810362	52.7	2.2	92.53	5934
		GCA_002698895.1_ASM269889v1	Tara Oceans North Atlantic	No	Yes	No	d__Bacteria;p__Bacteroidota;c__Bacteroidia;o__Flavobacteriales;f__Flavobacteriaceae;g__Zunongwangia;s__Zunongwangia profunda	80	95.25	3.05	41.67	4854596	5749	73	73	128417	128334	66501	66422	233347	232915	36.4	4.74	88.37	4206
		GCA_002698925.1_ASM269892v1	Tara Oceans North Atlantic	No	Yes	No	d__Bacteria;p__Verrucomicrobiota;c__Kiritimatiellae;o__Kiritimatiellales;f__UBA1859;g__UBA1859;s__UBA1859 sp003532555	43.4	85.65	8.45	5.88	1886450	4825	71	71	40044	39918	26569	26501	93261	92981	44	3.18	93.9	1796
		GCA_002698965.1_ASM269896v1	Tara Oceans North Atlantic	No	Yes	No	d__Bacteria;p__Planctomycetota;c__Planctomycetes;o__Pirellulales;f__Pirellulaceae;g__UBA721;s__UBA721 sp002698965	77.82	89.32	2.3	14.29	5424119	2975	192	192	37971	37951	28250	28235	151277	151175	46.5	7.25	92.69	4482
		GCA_002698985.1_ASM269898v1	Tara Oceans North Atlantic	No	Yes	No	d__Bacteria;p__Bacteroidota;c__Bacteroidia;o__Chitinophagales;f__Saprospiraceae;g__GCA-2698985;s__GCA-2698985 sp002698985	78.29	91.09	2.56	0	4832204	21	102	102	71913	71913	47374	47374	180227	180227	51.8	2.1	87.23	3550
		GCA_002698995.1_ASM269899v1	Tara Oceans North Atlantic	No	Yes	No	d__Bacteria;p__Bacteroidota;c__Ignavibacteria;o__Ignavibacteriales;f__Melioribacteraceae;g__GCA-2698995;s__GCA-2698995 sp002698995	97.2	100	0.56	0	4231110	22	36	36	198761	198761	117530	117530	509133	509133	31.9	1.56	92.28	3736
		GCA_002699025.1_ASM269902v1	Tara Oceans North Atlantic	No	Yes	No	d__Bacteria;p__Myxococcota;c__Polyangia;o__Polyangiales;f__SG8-38;g__GCA-2699025;s__GCA-2699025 sp002699025	72.96	95.16	4.44	0	9253999	76	238	238	54855	54855	38882	38882	223756	223756	73.9	1.54	87.24	7098
		GCA_002699085.1_ASM269908v1	Tara Oceans North Atlantic	No	Yes	No	d__Bacteria;p__Proteobacteria;c__Alphaproteobacteria;o__Micavibrionales;f__Micavibrionaceae;g__UBA9664;s__UBA9664 sp002699085	80.58	87.83	1.45	0	1886490	0	31	31	81846	81846	60854	60854	239688	239688	41.7	2.33	93.69	1924
		GCA_002699125.1_ASM269912v1	Tara Oceans North Atlantic	No	Yes	No	d__Bacteria;p__Chloroflexota;c__Anaerolineae;o__Promineofilales;f__Promineofilaceae;g__GCA-2699125;s__GCA-2699125 sp002699125	59.07	96.97	7.58	0	8054069	35	188	188	69233	69233	42840	42840	255659	255659	54	1.91	90.11	6927
		GCA_002699145.1_ASM269914v1	Tara Oceans North Atlantic	No	Yes	No	d__Bacteria;p__Proteobacteria;c__Gammaproteobacteria;o__Pseudomonadales;f__Halieaceae;g__Halioglobus;s__Halioglobus sp002699145	81.71	98.36	3.33	64.29	5201423	84	61	61	157464	157464	85269	85267	567656	567654	64.7	3.86	90.68	4640
		GCA_002699165.1_ASM269916v1	Tara Oceans North Atlantic	No	Yes	No	d__Bacteria;p__Chloroflexota;c__Dehalococcoidia;o__UBA1151;f__TMED-70;g__TMED-70;s__TMED-70 sp002699165	62.54	87.29	4.95	80	1381496	1077	37	37	54047	54031	37337	37308	134562	134500	30.6	2.6	95.02	1424
		GCA_002699205.1_ASM269920v1	Tara Oceans North Atlantic	No	Yes	No	d__Bacteria;p__Bacteroidota;c__Bacteroidia;o__Flavobacteriales;f__Flavobacteriaceae;g__Muricauda;s__Muricauda sp002699205	86	88.45	0.49	0	4466321	317	53	53	153457	153457	84270	84264	567454	567454	41.4	1.96	91.24	4072
		GCA_002699305.1_ASM269930v1	Tara Oceans North Atlantic	No	Yes	No	d__Bacteria;p__Proteobacteria;c__Alphaproteobacteria;o__Rhizobiales;f__Rhizobiaceae;g__Martelella;s__Martelella mediterranea	73.32	96.27	4.59	71.43	5328004	1914	92	92	88635	88604	57913	57892	256602	256566	62.4	1.42	89.3	4943
		GCA_002699365.1_ASM269936v1	Tara Oceans North Atlantic	No	Yes	No	d__Bacteria;p__Verrucomicrobiota;c__Verrucomicrobiae;o__Opitutales;f__Puniceicoccaceae;g__GCA-2699365;s__GCA-2699365 sp002699365	90.9	95.95	1.01	0	1822408	2428	37	37	62880	62733	49254	49188	225050	224989	42.7	2.79	93.54	1653
		GCA_002699445.1_ASM269944v1	Tara Oceans North Atlantic	No	Yes	No	d__Bacteria;p__Actinobacteriota;c__Actinobacteria;o__Nanopelagicales;f__GCA-2699445;g__GCA-2699445;s__GCA-2699445 sp002699445	84.89	89.74	0.97	0	2400453	167	86	86	40457	40457	27912	27910	129392	129364	56.9	2.11	92.24	2204
		GCA_002699455.1_ASM269945v1	Tara Oceans North Atlantic	No	Yes	No	d__Bacteria;p__Actinobacteriota;c__Acidimicrobiia;o__Microtrichales;f__UBA8592;g__MedAcidi-G2A;s__MedAcidi-G2A sp000817095	65.54	86.89	4.27	40	2084737	12411	31	31	94767	94389	67249	66849	238511	238076	43	1.27	94.42	2044
		GCA_002699485.1_ASM269948v1	Tara Oceans North Atlantic	No	Yes	No	d__Bacteria;p__Chloroflexota;c__Dehalococcoidia;o__SAR202;f__UBA2962;g__UBA2962;s__UBA2962 sp002699485	82.98	90.43	1.49	0	1906463	496	61	61	34057	34057	31253	31245	171871	171871	38.8	3.11	93.62	1947
		GCA_002699585.1_ASM269958v1	Tara Oceans North Atlantic	No	Yes	No	d__Bacteria;p__Chloroflexota;c__Anaerolineae;o__SBR1031;f__A4b;g__GCA-2699585;s__GCA-2699585 sp002699585	88.18	92.73	0.91	0	6701443	35	42	42	674874	674874	159558	159557	1103708	1103708	53	2.91	88.96	5879
		GCA_002699695.2_ASM269969v2	Tara Oceans North Atlantic	No	Yes	No	d__Bacteria;p__Proteobacteria;c__Alphaproteobacteria;o__Rhodobacterales;f__Rhodobacteraceae;g__GCA-002705045;s__GCA-002705045 sp002699695	82.85	86.2	0.67	0	1995055	513	105	105	22200	22200	19000	18995	67578	67548	37.7	1.89	91.76	1936
		GCA_002699725.1_ASM269972v1	Tara Oceans North Atlantic	No	Yes	No	d__Bacteria;p__Actinobacteriota;c__Acidimicrobiia;o__Microtrichales;f__MedAcidi-G1;g__S20-B6;s__S20-B6 sp002699725	73.85	92.35	3.7	60	2116609	9750	63	63	45598	45386	33596	33442	126600	125770	68.7	1.88	93.95	2093
		GCA_002700095.1_ASM270009v1	Tara Oceans North Atlantic	No	Yes	No	d__Bacteria;p__Proteobacteria;c__Alphaproteobacteria;o__Rhizobiales;f__Rhizobiaceae;g__Fulvimarina;s__Fulvimarina sp002700095	88.02	96.77	1.75	50	5621037	507	100	100	80610	80610	56210	56205	356497	356461	67	1.77	86.27	5147
		GCA_002700125.1_ASM270012v1	Tara Oceans North Atlantic	No	Yes	No	d__Bacteria;p__Chloroflexota;c__Dehalococcoidia;o__UBA1151;f__TMED-70;g__GCA-002700125;s__GCA-002700125 sp002700125	71.37	86.77	3.08	75	1222601	3057	56	56	30679	30614	21832	21777	90596	90251	36	2.28	95.55	1239
		GCA_002700145.1_ASM270014v1	Tara Oceans North Atlantic	No	Yes	No	d__Bacteria;p__Actinobacteriota;c__Actinobacteria;o__Mycobacteriales;f__Mycobacteriaceae;g__Gordonia;s__Gordonia sp002700145	68.25	96.95	5.74	68	5354704	2782	73	73	113649	113540	73352	73314	262659	262624	66.5	1.19	90.87	4954
		GCA_002700265.1_ASM270026v1	Tara Oceans North Atlantic	No	Yes	No	d__Bacteria;p__Proteobacteria;c__Alphaproteobacteria;o__Parvibaculales;f__Parvibaculaceae;g__Parvibaculum;s__Parvibaculum sp002480495	74.57	99.57	5	93.33	3856903	167	14	14	451133	451115	275493	275481	929922	929906	62.4	0.78	90.01	3686
		GCA_002700285.1_ASM270028v1	Tara Oceans North Atlantic	No	Yes	No	d__Bacteria;p__Bacteroidota;c__Bacteroidia;o__Flavobacteriales;f__UA16;g__UBA974;s__UBA974 sp002700285	73.65	97.85	4.84	58.33	2509760	932	46	46	103452	103429	54560	54539	312199	312153	43.3	2.94	94.33	2162
		GCA_002700305.1_ASM270030v1	Tara Oceans North Atlantic	No	Yes	No	d__Bacteria;p__Proteobacteria;c__Alphaproteobacteria;o__Caulobacterales;f__Hyphomonadaceae;g__Hyphomonas;s__Hyphomonas sp002700305	89.26	97.61	1.67	28.57	3518857	184	56	56	93345	93345	62836	62833	459616	459616	61.6	1.88	91.29	3454
		GCA_002700325.1_ASM270032v1	Tara Oceans North Atlantic	No	Yes	No	d__Bacteria;p__Proteobacteria;c__Alphaproteobacteria;o__Rhodobacterales;f__Rhodobacteraceae;g__Salipiger;s__Salipiger thiooxidans	55.49	98.39	8.58	82.61	5859138	1166	67	67	154349	154323	87449	87432	550937	550803	67.5	3.6	88.25	5629
		GCA_002700335.1_ASM270033v1	Tara Oceans North Atlantic	No	Yes	No	d__Bacteria;p__Bacteroidota;c__Bacteroidia;o__Flavobacteriales;f__BACL11;g__BACL11;s__BACL11 sp002693745	63.13	98.28	7.03	0	2275521	967	41	41	100555	100527	55500	55476	248550	248349	30.4	5.06	95.65	2102
		GCA_002700365.1_ASM270036v1	Tara Oceans North Atlantic	No	Yes	No	d__Bacteria;p__Proteobacteria;c__Alphaproteobacteria;o__Sphingomonadales;f__Emcibacteraceae;g__GCA-2700365;s__GCA-2700365 sp002700365	97.79	99.94	0.43	0	2399875	447	12	12	714405	713970	199989	199952	911891	911882	48.7	3.11	89.87	2257
		GCA_002700385.1_ASM270038v1	Tara Oceans North Atlantic	No	Yes	No	d__Bacteria;p__Proteobacteria;c__Gammaproteobacteria;o__Methylococcales;f__Cycloclasticaceae;g__Cycloclasticus;s__Cycloclasticus sp002700385	90.13	98.33	1.64	33.33	2516899	88	13	13	481247	481160	193607	193600	811841	811841	43.4	5.18	92.2	2448
		GCA_002701295.1_ASM270129v1	Tara Oceans North Atlantic	No	Yes	No	d__Bacteria;p__Proteobacteria;c__Alphaproteobacteria;o__Caulobacterales;f__Hyphomonadaceae;g__Ponticaulis;s__Ponticaulis sp002701295	87.46	93.41	1.19	50	3485647	103	133	133	31424	31424	26207	26207	125601	125601	54.4	2.36	91.63	3409
		GCA_002701305.1_ASM270130v1	Tara Oceans North Atlantic	No	Yes	No	d__Bacteria;p__Proteobacteria;c__Alphaproteobacteria;o__Sphingomonadales;f__Sphingomonadaceae;g__Erythrobacter_A;s__Erythrobacter_A citreus	54.06	95.21	8.23	84.48	2915406	18444	52	52	95904	94890	56065	55710	317132	315008	64.8	1.9	91.68	2858
		GCA_002701315.1_ASM270131v1	Tara Oceans North Atlantic	No	Yes	No	d__Bacteria;p__Proteobacteria;c__Gammaproteobacteria;o__Pseudomonadales;f__Ketobacteraceae;g__Ketobacter;s__Ketobacter sp002471665	60.99	98.89	7.58	64.29	6175078	791	88	88	188024	188003	70171	70162	395152	395020	54.3	4.19	91.48	5388
		GCA_002701365.1_ASM270136v1	Tara Oceans North Atlantic	No	Yes	No	d__Bacteria;p__Bacteroidota;c__Bacteroidia;o__Flavobacteriales;f__TMED113;g__GCA-002701365;s__GCA-002701365 sp002701365	93.17	93.17	0	0	1545239	174	39	39	57260	57260	39621	39617	215955	215955	30.5	1.54	96.58	1342
		GCA_002701375.1_ASM270137v1	Tara Oceans North Atlantic	No	Yes	No	d__Bacteria;p__Cyanobacteria;c__Cyanobacteriia;o__Synechococcales;f__Cyanobiaceae;g__Synechococcus_C;s__Synechococcus_C sp002701375	75.95	87.5	2.31	23.08	3000427	3086	87	87	49924	49838	34487	34452	177946	177839	51.2	6.35	85.81	3057
		GCA_002701385.1_ASM270138v1	Tara Oceans North Atlantic	No	Yes	No	d__Bacteria;p__Planctomycetota;c__Planctomycetes;o__Pirellulales;f__Pirellulaceae;g__UBA721;s__UBA721 sp002701385	97.58	97.58	0	0	4890980	887	100	100	100832	100822	48909	48900	475131	475048	48.1	5.05	91.75	3759
		GCA_002701395.1_ASM270139v1	Tara Oceans North Atlantic	No	Yes	No	d__Bacteria;p__Proteobacteria;c__Alphaproteobacteria;o__Rhodobacterales;f__Rhodobacteraceae;g__Rhodobacter_B;s__Rhodobacter_B sp002701395	52.82	99.02	9.24	60.71	5306035	932	62	62	121339	121337	85581	85566	369511	369504	65.5	3.26	90.34	5121
		GCA_002701445.1_ASM270144v1	Tara Oceans North Atlantic	No	Yes	No	d__Bacteria;p__Proteobacteria;c__Gammaproteobacteria;o__Pseudomonadales;f__Saccharospirillaceae;g__Oleibacter;s__Oleibacter sp002298335	55.96	97.21	8.25	90.91	3698377	458	53	53	112039	112037	69780	69772	242840	242832	55	1.64	89.86	3417
		GCA_002701455.1_ASM270145v1	Tara Oceans North Atlantic	No	Yes	No	d__Bacteria;p__Proteobacteria;c__Alphaproteobacteria;o__Nisaeales;f__Nisaeaceae;g__GCA-002701455;s__GCA-002701455 sp002701455	78.47	91.52	2.61	37.5	2860664	12671	122	122	33046	32967	23448	23344	80944	80665	42.5	2.39	91.93	2771
		GCA_002701525.1_ASM270152v1	Tara Oceans North Atlantic	No	Yes	No	d__Bacteria;p__Marinisomatota;c__Marinisomatia;o__SCGC-AAA003-L08;f__SCGC-AAA003-L08;g__SCGC-AAA003-L08;s__SCGC-AAA003-L08 sp002701525	81.31	86.81	1.1	100	1450177	9322	54	54	33197	33021	26855	26682	84195	83662	30.8	2.15	96.57	1335
		GCA_002701545.1_ASM270154v1	Tara Oceans North Atlantic	No	Yes	No	d__Bacteria;p__Planctomycetota;c__Planctomycetes;o__Pirellulales;f__Pirellulaceae;g__GCA-2701545;s__GCA-2701545 sp002701545	57.98	97.58	7.92	30.77	7804056	4435	229	229	51497	51486	34078	34059	208124	208102	56.1	3.5	88.87	5992
		GCA_002701785.1_ASM270178v1	Tara Oceans North Atlantic	No	Yes	No	d__Bacteria;p__Marinisomatota;c__Marinisomatia;o__Marinisomatales;f__TCS55;g__GCA-002701945;s__GCA-002701945 sp002701785	78.01	89.01	2.2	0	1823205	16822	57	57	40042	39674	31986	31690	107756	106294	32.8	1.88	96.02	1640
		GCA_002701805.1_ASM270180v1	Tara Oceans North Atlantic	No	Yes	No	d__Bacteria;p__Chloroflexota;c__Dehalococcoidia;o__UBA1151;f__Bin127;g__GCA-002708145;s__GCA-002708145 sp002728715	68.65	88.45	3.96	100	1342867	1584	22	22	99430	99351	61039	60967	187180	186919	31.3	1.34	95.47	1311
		GCA_002701825.1_ASM270182v1	Tara Oceans North Atlantic	No	Yes	No	d__Bacteria;p__Bacteroidota;c__Bacteroidia;o__Flavobacteriales;f__Flavobacteriaceae;g__TMED96;s__	48.89	96.69	9.56	22.73	2332376	6394	77	77	44468	44433	30290	30207	98534	98432	31.2	4.04	95.54	2152
		GCA_002701845.1_ASM270184v1	Tara Oceans North Atlantic	No	Yes	No	d__Bacteria;p__Proteobacteria;c__Gammaproteobacteria;o__Pseudomonadales;f__Ketobacteraceae;g__GCA-2701845;s__GCA-2701845 sp002701845	84.25	98.15	2.78	20	4895318	734	69	69	96350	96350	70946	70936	340022	340018	57.4	4.92	90.72	4304
		GCA_002701925.1_ASM270192v1	Tara Oceans North Atlantic	No	Yes	No	d__Bacteria;p__Dadabacteria;c__UBA1144;o__UBA1144;f__UBA1144;g__GCA-2701925;s__GCA-2701925 sp002701925	56.98	85.78	5.76	28.57	1056808	14215	26	26	53461	52258	40646	40099	180014	177394	32.5	1.23	96.15	1108
		GCA_002702065.1_ASM270206v1	Tara Oceans North Atlantic	No	Yes	No	d__Bacteria;p__Chloroflexota;c__Anaerolineae;o__SBR1031;f__A4b;g__GCA-2702065;s__GCA-2702065 sp002702065	94.22	97.27	0.61	0	6768311	0	14	14	1017722	1017722	483450	483450	2698294	2698294	57.1	2.89	91.61	6089
		GCA_002702085.1_ASM270208v1	Tara Oceans North Atlantic	No	Yes	No	d__Bacteria;p__Actinobacteriota;c__Acidimicrobiia;o__Microtrichales;f__TK06;g__MedAcidi-G3;s__MedAcidi-G3 sp000817105	57.29	93.59	7.26	0	2500049	7219	31	31	125665	125050	80646	80413	293761	293349	50.7	5.38	93.77	2447
		GCA_002702145.1_ASM270214v1	Tara Oceans North Atlantic	No	Yes	No	d__Bacteria;p__Proteobacteria;c__Gammaproteobacteria;o__Nevskiales;f__Salinisphaeraceae;g__Salinisphaera;s__	49.63	91.78	8.43	28.57	3539946	7598	130	130	33670	33517	27230	27171	151519	151026	64.4	2.34	89.59	3324
		GCA_002702365.1_ASM270236v1	Tara Oceans North Atlantic	No	Yes	No	d__Bacteria;p__Bacteroidota;c__Bacteroidia;o__Flavobacteriales;f__UBA10066;g__UBA10066;s__UBA10066 sp003448535	46.86	88.51	8.33	3.7	3468250	947	178	178	22029	22023	19484	19479	86093	86080	41	1.84	94.63	3420
		GCA_002702575.1_ASM270257v1	Tara Oceans North Atlantic	No	Yes	No	d__Bacteria;p__Planctomycetota;c__Phycisphaerae;o__Phycisphaerales;f__SM1A02;g__UBA1668;s__UBA1668 sp002702575	67.61	98.86	6.25	87.5	3172060	1511	32	32	148701	148607	99126	99079	400113	399674	57.8	1.22	93.46	2675
		GCA_002702655.1_ASM270265v1	Tara Oceans North Atlantic	No	Yes	No	d__Bacteria;p__Planctomycetota;c__Planctomycetes;o__Pirellulales;f__Ga0077529;g__GCA-2702655;s__GCA-2702655 sp002702655	71.85	97.7	5.17	0	7415867	7	81	81	186300	186300	91553	91553	464408	464408	64.4	5.02	85.05	5858
		GCA_002702705.1_ASM270270v1	Tara Oceans North Atlantic	No	Yes	No	d__Bacteria;p__Chloroflexota;c__Anaerolineae;o__Anaerolineales;f__Anaerolineaceae;g__UBA6170;s__UBA6170 sp002702705	66.34	99.09	6.55	0	5885093	46	74	74	144146	144146	79528	79527	296139	296139	41.4	2.74	90.09	5145
		GCA_002702725.1_ASM270272v1	Tara Oceans North Atlantic	No	Yes	No	d__Bacteria;p__Proteobacteria;c__Gammaproteobacteria;o__Pseudomonadales;f__Porticoccaceae;g__BRH-c0;s__BRH-c0 sp002702725	77.99	91.89	2.78	6.67	3562751	363	165	165	24098	24098	21592	21590	100062	100062	57.7	2.59	90.33	3408
		GCA_002702745.1_ASM270274v1	Tara Oceans North Atlantic	No	Yes	No	d__Bacteria;p__Bacteroidota;c__Bacteroidia;o__Flavobacteriales;f__Flavobacteriaceae;g__MED-G13;s__MED-G13 sp002702745	65.81	86.21	4.08	100	1327887	2210	32	32	65911	65911	41496	41427	118829	118829	30.4	2.44	96.16	1232
		GCA_002702785.1_ASM270278v1	Tara Oceans North Atlantic	No	Yes	No	d__Bacteria;p__Actinobacteriota;c__Actinobacteria;o__Actinomycetales;f__Microbacteriaceae;g__UBA1487;s__UBA1487 sp002325245	82.34	97.39	3.01	61.54	2732301	781	56	56	69950	69948	48791	48777	140354	140346	69.6	1.8	92.93	2667
		GCA_002702835.1_ASM270283v1	Tara Oceans North Atlantic	No	Yes	No	d__Bacteria;p__Proteobacteria;c__Alphaproteobacteria;o__Rhodobacterales;f__Rhodobacteraceae;g__Roseovarius;s__Roseovarius sp002720475	53.45	96.55	8.62	10.53	3558106	218	68	68	98026	98026	52325	52321	249775	249775	66.8	4.77	91.4	3538
		GCA_002702875.1_ASM270287v1	Tara Oceans North Atlantic	No	Yes	No	d__Bacteria;p__Bacteroidota;c__Bacteroidia;o__Flavobacteriales;f__Flavobacteriaceae;g__TMED96_A;s__TMED96_A sp002702875	74.01	86.86	2.57	25	1705009	635	82	82	26336	26336	20792	20785	106253	106210	28.6	3.75	96.25	1636
		GCA_002702895.1_ASM270289v1	Tara Oceans North Atlantic	No	Yes	No	d__Bacteria;p__Bacteroidota;c__Bacteroidia;o__Flavobacteriales;f__Flavobacteriaceae;g__MAG-121220-bin8;s__MAG-121220-bin8 sp002702895	89.95	97.3	1.47	100	1865845	1785	30	30	84104	84034	62194	62135	199665	199605	28.4	2.16	95.85	1738
		GCA_002703625.1_ASM270362v1	Tara Oceans North Atlantic	No	Yes	No	d__Bacteria;p__Myxococcota;c__Polyangia;o__Polyangiales;f__SG8-38;g__UBA1660;s__UBA1660 sp002320815	64.72	96.02	6.26	23.08	8196304	288	137	137	84374	84374	59827	59824	373063	373060	71.3	3.35	92.37	6978
		GCA_002703665.1_ASM270366v1	Tara Oceans North Atlantic	No	Yes	No	d__Bacteria;p__Proteobacteria;c__Gammaproteobacteria;o__Pseudomonadales;f__Alcanivoracaceae;g__Alcanivorax;s__Alcanivorax sp002354605	76.96	98.51	4.31	83.33	3443367	1418	86	86	55071	55071	40039	40022	265166	265110	64.9	2.72	90.73	3228
		GCA_002704875.1_ASM270487v1	Tara Oceans North Atlantic	No	Yes	No	d__Bacteria;p__Marinisomatota;c__Marinisomatia;o__SCGC-AAA003-L08;f__GCA-002719095;g__;s__	49.46	93.41	8.79	36.36	1625503	11243	51	51	37395	37138	31872	31652	151529	150714	31.5	2.92	96.51	1511
		GCA_002704915.1_ASM270491v1	Tara Oceans North Atlantic	No	Yes	No	d__Bacteria;p__Proteobacteria;c__Alphaproteobacteria;o__Caulobacterales;f__Parvularculaceae;g__Marinicaulis;s__Marinicaulis sp002704915	87.15	97.1	1.99	8.7	4497611	1	85	85	92420	92420	52913	52913	481935	481935	59.1	3.02	90.28	4342
		GCA_002704965.1_ASM270496v1	Tara Oceans North Atlantic	No	Yes	No	d__Bacteria;p__Bacteroidota;c__Bacteroidia;o__Flavobacteriales;f__BACL11;g__BACL11;s__BACL11 sp002730985	62.46	94.71	6.45	78.57	1748467	13284	47	47	52473	52216	37201	36918	164035	162578	32.9	1.02	95.77	1590
		GCA_002705045.2_ASM270504v2	Tara Oceans North Atlantic	No	Yes	No	d__Bacteria;p__Proteobacteria;c__Alphaproteobacteria;o__Rhodobacterales;f__Rhodobacteraceae;g__GCA-002705045;s__GCA-002705045 sp002705045	92.82	94.77	0.39	66.67	2235388	6834	90	90	38817	38700	24837	24761	200271	199971	38	1.63	91.05	2198
		GCA_002705055.1_ASM270505v1	Tara Oceans North Atlantic	No	Yes	No	d__Bacteria;p__Planctomycetota;c__UBA1135;o__UBA1135;f__UBA1135;g__GCA-2705055;s__GCA-2705055 sp002705055	89.76	95.16	1.08	0	3853292	20	64	64	77499	77499	60207	60207	226362	226362	66.9	5.94	94.58	3224
		GCA_002705085.1_ASM270508v1	Tara Oceans North Atlantic	No	Yes	No	d__Bacteria;p__Planctomycetota;c__Phycisphaerae;o__Phycisphaerales;f__SM1A02;g__UBA8653;s__UBA8653 sp002705085	85.11	90.81	1.14	50	1975315	331	53	53	47270	47258	37270	37263	129071	129069	57.7	1.22	94.63	1748
		GCA_002705125.1_ASM270512v1	Tara Oceans North Atlantic	No	Yes	No	d__Bacteria;p__Verrucomicrobiota;c__Verrucomicrobiae;o__Verrucomicrobiales;f__DEV007;g__EC70;s__EC70 sp002705125	76.81	87.01	2.04	71.43	2975687	10764	114	114	33078	33022	26102	26008	78934	78491	38.8	1.73	94.17	2452
		GCA_002705145.1_ASM270514v1	Tara Oceans North Atlantic	No	Yes	No	d__Bacteria;p__Proteobacteria;c__Gammaproteobacteria;o__Pseudomonadales;f__Pseudohongiellaceae;g__UBA9145;s__UBA9145 sp002457215	59.96	89.51	5.91	91.18	3305258	14573	121	121	35699	35451	27316	27195	103699	103166	43.9	1.75	89.78	2968
		GCA_002705305.1_ASM270530v1	Tara Oceans North Atlantic	No	Yes	No	d__Bacteria;p__Actinobacteriota;c__Acidimicrobiia;o__Microtrichales;f__TK06;g__UBA2110;s__UBA2110 sp002705305	76.05	95.3	3.85	20	2540084	18955	39	39	113926	113166	65130	64644	337772	335742	55	2.86	94.31	2508
		GCA_002705605.1_ASM270560v1	Tara Oceans North Atlantic	No	Yes	No	d__Bacteria;p__Marinisomatota;c__Marinisomatia;o__SCGC-AAA003-L08;f__GCA-002707645;g__GCA-002707645;s__GCA-002707645 sp002705605	60.97	92.12	6.23	27.5	1642075	19771	43	43	71914	71588	38187	37728	275962	271654	28.3	4.43	96.42	1530
		GCA_002705625.1_ASM270562v1	Tara Oceans North Atlantic	No	Yes	No	d__Bacteria;p__Bacteroidota;c__Bacteroidia;o__Flavobacteriales;f__Flavobacteriaceae;g__MED-G11;s__MED-G11 sp002457075	56.55	85.95	5.88	75	1120682	6513	53	53	25241	25067	21144	21022	73927	73591	29.9	2.61	96.41	1115
		GCA_002710865.1_ASM271086v1	Tara Oceans North Atlantic	No	Yes	No	d__Bacteria;p__Proteobacteria;c__Alphaproteobacteria;o__Rhizobiales;f__Rhizobiaceae;g__Notoacmeibacter;s__Notoacmeibacter sp002708825	65.46	98.26	6.56	0	4884171	9	50	50	147220	147220	97683	97683	367220	367220	63.8	3.48	90.38	4678
		GCA_002710945.1_ASM271094v1	Tara Oceans North Atlantic	No	Yes	No	d__Bacteria;p__Bacteroidota;c__Bacteroidia;o__Flavobacteriales;f__Flavobacteriaceae;g__Leeuwenhoekiella;s__Leeuwenhoekiella sp002708845	61.58	94.68	6.62	79.31	4372514	725	20	20	342122	342064	218625	218589	1125179	1125142	40.7	1.1	91.23	3716
		GCA_002711075.1_ASM271107v1	Tara Oceans North Atlantic	No	Yes	No	d__Bacteria;p__Bacteroidota;c__Bacteroidia;o__Flavobacteriales;f__GCA-002722245;g__GCA-002722245;s__	45.63	87.93	8.46	0	1986386	1868	58	58	51100	51094	34248	34215	147994	147902	33	2.42	92.7	1776
		GCA_002711105.1_ASM271110v1	Tara Oceans North Atlantic	No	Yes	No	d__Bacteria;p__Planctomycetota;c__UBA8108;o__UBA1146;f__UBA1146;g__UBA1146;s__UBA1146 sp002711105	63.92	96.17	6.45	85.71	3709474	5545	67	67	116595	116467	55365	55282	386464	385871	55.4	3.43	91.66	2895
		GCA_002711125.1_ASM271112v1	Tara Oceans North Atlantic	No	Yes	No	d__Bacteria;p__Bacteroidota;c__Bacteroidia;o__Flavobacteriales;f__BACL11;g__GCA-2711125;s__GCA-2711125 sp002711125	94.34	97.04	0.54	0	1691798	10766	16	16	358698	357546	105737	105064	567118	561646	29.1	4.22	96.11	1525
		GCA_002711135.1_ASM271113v1	Tara Oceans North Atlantic	No	Yes	No	d__Bacteria;p__Bacteroidota;c__Bacteroidia;o__Flavobacteriales;f__UBA10066;g__MED-G20;s__MED-G20 sp002691605	76.87	90.32	2.69	33.33	2450038	31128	62	62	56737	55692	39516	39014	147084	145287	30.2	4.1	94.97	2194
		GCA_002711185.1_ASM271118v1	Tara Oceans North Atlantic	No	Yes	No	d__Bacteria;p__Bacteroidota;c__Bacteroidia;o__Flavobacteriales;f__Flavobacteriaceae;g__GCA-002723295;s__GCA-002723295 sp002711185	53.17	95.47	8.46	21.05	1822488	12218	66	66	38997	38653	27613	27428	79778	79433	29.9	1.7	95.58	1758
		GCA_002711205.1_ASM271120v1	Tara Oceans North Atlantic	No	Yes	No	d__Bacteria;p__Bdellovibrionota;c__Bdellovibrionia;o__Bdellovibrionales;f__UBA1609;g__UBA6776;s__UBA6776 sp002453155	83.01	91.96	1.79	0	2818849	11	81	81	47544	47544	34800	34800	104550	104550	45.2	3.48	91.87	2770
		GCA_002591625.1_ASM259162v1	Tara Oceans South Pacific	No	Yes	No	d__Bacteria;p__Proteobacteria;c__Gammaproteobacteria;o__Pseudomonadales;f__Porticoccaceae;g__TMED48;s__TMED48 sp002591625	63.72	88.52	4.96	59.09	2556368	14967	66	66	39812	39555	38732	38506	141026	139248	44.6	1.91	89.41	2350
		GCA_002708715.1_ASM270871v1	Tara Oceans South Pacific	No	Yes	No	d__Bacteria;p__Marinisomatota;c__Marinisomatia;o__Marinisomatales;f__UBA1611;g__GCA-002708715;s__GCA-002708715 sp002708715	64.81	86.81	4.4	0	2468286	2102	45	45	68651	68651	54850	54804	164208	164041	31.7	2.07	95.22	2189
		GCA_002708795.1_ASM270879v1	Tara Oceans South Pacific	No	Yes	No	d__Bacteria;p__Proteobacteria;c__Alphaproteobacteria;o__Rhodobacterales;f__Rhodobacteraceae;g__Paracoccus;s__Paracoccus sp002294185	89.75	96.1	1.27	83.33	3284009	411	50	50	92554	92554	65680	65671	214727	214669	65.9	1.3	91.47	3187
		GCA_002708825.1_ASM270882v1	Tara Oceans South Pacific	No	Yes	No	d__Bacteria;p__Proteobacteria;c__Alphaproteobacteria;o__Rhizobiales;f__Rhizobiaceae;g__Notoacmeibacter;s__Notoacmeibacter sp002708825	85.22	99.07	2.77	8.33	4696839	202	44	44	181486	181486	106746	106741	446470	446466	64.1	4.97	90.5	4478
		GCA_002708845.1_ASM270884v1	Tara Oceans South Pacific	No	Yes	No	d__Bacteria;p__Bacteroidota;c__Bacteroidia;o__Flavobacteriales;f__Flavobacteriaceae;g__Leeuwenhoekiella;s__Leeuwenhoekiella sp002708845	94.52	99.37	0.97	0	4353457	22	39	39	194882	194882	111627	111626	572156	572156	40.5	3.12	91.26	3671
		GCA_002708885.1_ASM270888v1	Tara Oceans South Pacific	No	Yes	No	d__Bacteria;p__Verrucomicrobiota;c__Verrucomicrobiae;o__Verrucomicrobiales;f__DEV007;g__EC70;s__EC70 sp002708885	74.2	92.6	3.68	92.31	3400303	12409	97	97	41723	41406	35054	34926	103931	103571	43.6	2.86	94.1	2702
		GCA_002708905.1_ASM270890v1	Tara Oceans South Pacific	No	Yes	No	d__Bacteria;p__Proteobacteria;c__Gammaproteobacteria;o__Pseudomonadales;f__Ketobacteraceae;g__Ketobacter;s__Ketobacter sp002708905	84.97	96.42	2.29	0	5418417	130	48	48	241626	241626	112883	112880	382759	382759	52.7	3.68	91.52	4783
		GCA_002708935.1_ASM270893v1	Tara Oceans South Pacific	No	Yes	No	d__Bacteria;p__Actinobacteriota;c__Acidimicrobiia;o__Microtrichales;f__TK06;g__MedAcidi-G3;s__MedAcidi-G3 sp002708935	72.23	95.73	4.7	71.43	2408629	18381	26	26	132305	131241	92639	91932	433052	430259	53	0.54	94.34	2382
		GCA_002708965.1_ASM270896v1	Tara Oceans South Pacific	No	Yes	No	d__Bacteria;p__Proteobacteria;c__Alphaproteobacteria;o__Rhodobacterales;f__Rhodobacteraceae;g__Sulfitobacter;s__Sulfitobacter sp002731875	83.95	90.05	1.22	0	3619350	763	86	86	44269	44269	42085	42076	188612	188609	56.8	2.54	90.72	3564
		GCA_002708985.1_ASM270898v1	Tara Oceans South Pacific	No	Yes	No	d__Bacteria;p__Bacteroidota;c__Bacteroidia;o__Chitinophagales;f__UBA8649;g__UBA8649;s__UBA8649 sp002708985	82.08	87.03	0.99	0	1982125	67	46	46	54066	54055	43089	43088	135355	135355	41.7	3.13	95.53	1765
		GCA_002708995.1_ASM270899v1	Tara Oceans South Pacific	No	Yes	No	d__Bacteria;p__Proteobacteria;c__Alphaproteobacteria;o__UBA7985;f__UBA7985;g__UBA7985;s__UBA7985 sp002708995	87.17	91.52	0.87	50	2602685	11	42	42	103184	103184	61968	61968	190392	190392	63.2	2.79	89.02	2354
		GCA_002709045.1_ASM270904v1	Tara Oceans South Pacific	No	Yes	No	d__Bacteria;p__Planctomycetota;c__Planctomycetes;o__Pirellulales;f__Pirellulaceae;g__UBA721;s__UBA721 sp002709045	92.87	92.87	0	0	4535358	280	69	69	85821	85821	65729	65725	449348	449348	46.5	2.58	92.12	3519
		GCA_002709065.1_ASM270906v1	Tara Oceans South Pacific	No	Yes	No	d__Bacteria;p__Proteobacteria;c__Alphaproteobacteria;o__Tistrellales;f__Tistrellaceae;g__Tistrella;s__Tistrella mobilis	92.8	99	1.24	0	6637452	537	68	68	188781	188781	97609	97601	428072	428061	67.9	3	89.71	5995
		GCA_002709075.1_ASM270907v1	Tara Oceans South Pacific	No	Yes	No	d__Bacteria;p__Proteobacteria;c__Alphaproteobacteria;o__Defluviicoccales;f__UBA2964;g__GCA-2709075;s__GCA-2709075 sp002709075	99.57	99.57	0	0	2522793	595	26	26	124199	124199	97030	97007	408183	407953	40.4	4.99	89.24	2386
		GCA_002709205.1_ASM270920v1	Tara Oceans South Pacific	No	Yes	No	d__Bacteria;p__Verrucomicrobiota;c__Verrucomicrobiae;o__Verrucomicrobiales;f__Akkermansiaceae;g__Roseibacillus;s__Roseibacillus sp002420305	74.9	89.1	2.84	0	3353936	2841	91	91	47527	47523	36856	36825	160757	160571	53.7	4.46	92.55	2729
		GCA_002709235.1_ASM270923v1	Tara Oceans South Pacific	No	Yes	No	d__Bacteria;p__Proteobacteria;c__Alphaproteobacteria;o__Caulobacterales;f__Hyphomonadaceae;g__Hirschia;s__Hirschia sp002709235	75.78	99.03	4.65	96	3804787	328	45	45	147190	147188	84550	84543	357296	357293	55.9	2.05	90.53	3592
		GCA_002709295.1_ASM270929v1	Tara Oceans South Pacific	No	Yes	No	d__Bacteria;p__Planctomycetota;c__Phycisphaerae;o__Phycisphaerales;f__SM1A02;g__GCA-002862325;s__GCA-002862325 sp002709295	78.96	98.86	3.98	0	3678879	1981	43	43	132343	132297	85555	85509	322130	321848	65.7	1.84	91.95	3037
		GCA_002709305.1_ASM270930v1	Tara Oceans South Pacific	No	Yes	No	d__Bacteria;p__Bacteroidota;c__Bacteroidia;o__Flavobacteriales;f__Crocinitomicaceae;g__UBA4466;s__UBA4466 sp002709305	84.25	97.3	2.61	55.56	2315296	280	29	29	164730	164730	79837	79828	415840	415840	32.5	17.53	94.29	2017
		GCA_002709345.1_ASM270934v1	Tara Oceans South Pacific	No	Yes	No	d__Bacteria;p__Proteobacteria;c__Gammaproteobacteria;o__Pseudomonadales;f__Pseudomonadaceae;g__Pseudomonas_A;s__Pseudomonas_A balearica	94.67	99.12	0.89	25	4248066	481	48	48	143669	143669	88501	88491	303015	303015	65	2.25	89.93	3999
		GCA_002709385.1_ASM270938v1	Tara Oceans South Pacific	No	Yes	No	d__Bacteria;p__Verrucomicrobiota_A;c__Chlamydiia;o__Parachlamydiales;f__GCA-2709385;g__GCA-2709385;s__GCA-2709385 sp002709385	84.47	97.97	2.7	0	3152361	41	49	49	76739	76739	64333	64333	254123	254123	38.5	2.68	91.56	2503
		GCA_002709405.1_ASM270940v1	Tara Oceans South Pacific	No	Yes	No	d__Bacteria;p__Proteobacteria;c__Alphaproteobacteria;o__Rhodobacterales;f__Rhodobacteraceae;g__Marinibacterium;s__Marinibacterium sp002709405	85.13	94.48	1.87	20	5385524	1081	103	103	70282	70282	52286	52276	183237	183237	65.7	3.24	89.51	5053
		GCA_002709445.1_ASM270944v1	Tara Oceans South Pacific	No	Yes	No	d__Bacteria;p__Proteobacteria;c__Alphaproteobacteria;o__Rhodospirillales_A;f__UBA1479;g__UBA1479;s__UBA1479 sp002325375	89.81	92.31	0.5	100	3875926	711	75	75	66946	66946	51679	51669	259682	259682	63.4	2.56	90.8	3707
		GCA_002709525.1_ASM270952v1	Tara Oceans South Pacific	No	Yes	No	d__Bacteria;p__Proteobacteria;c__Alphaproteobacteria;o__Rhodospirillales_A;f__UBA3470;g__UBA3470;s__UBA3470 sp002709525	79.65	85.85	1.24	0	3175648	4892	79	79	51864	51735	40198	40136	182101	181970	52.7	2.74	89.02	2967
		GCA_002709565.1_ASM270956v1	Tara Oceans South Pacific	No	Yes	No	d__Bacteria;p__Proteobacteria;c__Gammaproteobacteria;o__UBA1113;f__UBA1113;g__GCA-2709565;s__GCA-2709565 sp002709565	97.67	97.67	0	0	2411759	1	40	40	102915	102915	60293	60293	206968	206968	44.9	1.64	91.76	2157
		GCA_002709595.1_ASM270959v1	Tara Oceans South Pacific	No	Yes	No	d__Bacteria;p__Proteobacteria;c__Alphaproteobacteria;o__Caulobacterales;f__Hyphomonadaceae;g__Hyphomonas;s__Hyphomonas adhaerens	74.15	100	5.17	100	3871704	406	38	38	212238	212238	101886	101876	390311	390117	61.3	3.33	91.14	3773
		GCA_002709665.1_ASM270966v1	Tara Oceans South Pacific	No	Yes	No	d__Bacteria;p__Latescibacterota;c__UBA2968;o__UBA2968;f__GCA-2709665;g__GCA-2709665;s__GCA-2709665 sp002709665	72.44	94.44	4.4	50	5266773	5580	84	84	73707	73584	62699	62633	256750	256540	53	2.6	88.97	4918
		GCA_002709695.1_ASM270969v1	Tara Oceans South Pacific	No	Yes	No	d__Bacteria;p__Poribacteria;c__WGA-4E;o__WGA-4E;f__UBA9662;g__UBA9662;s__UBA9662 sp002709695	82.34	98.84	3.3	0	5196966	544	87	87	71421	71421	59735	59728	316059	316049	41.1	0.79	86.43	4325
		GCA_002709755.1_ASM270975v1	Tara Oceans South Pacific	No	Yes	No	d__Bacteria;p__Planctomycetota;c__Phycisphaerae;o__Phycisphaerales;f__SM1A02;g__UBA8087;s__UBA8087 sp002709755	91.47	94.32	0.57	0	2624986	19084	59	59	51856	51545	44491	44167	183175	181601	59.9	1.56	92.42	2236
		GCA_002709775.1_ASM270977v1	Tara Oceans South Pacific	No	Yes	No	d__Bacteria;p__Proteobacteria;c__Alphaproteobacteria;o__Rhodospirillales_A;f__Thalassospiraceae;g__Thalassospira;s__Thalassospira sp002709775	77.89	88.69	2.16	60	4238835	792	67	67	86544	86544	63266	63254	226316	226300	55.5	1.22	88.95	3954
		GCA_002709915.1_ASM270991v1	Tara Oceans South Pacific	No	Yes	No	d__Bacteria;p__Verrucomicrobiota;c__Verrucomicrobiae;o__Verrucomicrobiales;f__Akkermansiaceae;g__Roseibacillus;s__Roseibacillus sp002709915	72.31	94.41	4.42	100	3632077	8564	93	93	50686	50576	39054	38962	155879	155429	53.9	2.37	92.15	2921
		GCA_002709955.1_ASM270995v1	Tara Oceans South Pacific	No	Yes	No	d__Bacteria;p__Proteobacteria;c__Alphaproteobacteria;o__UBA8366;f__GCA-2696645;g__GCA-2696645;s__GCA-2696645 sp002709955	97.63	99.78	0.43	0	4232139	743	24	24	291286	291286	176339	176308	591868	591765	55.6	1.58	90.38	4047
		GCA_002711415.1_ASM271141v1	Tara Oceans South Pacific	No	Yes	No	d__Bacteria;p__Planctomycetota;c__Phycisphaerae;o__Phycisphaerales;f__SM1A02;g__GCA-2711415;s__GCA-2711415 sp002711415	93.74	96.59	0.57	0	2804671	571	45	45	114000	113976	62326	62313	367798	367756	61	3.55	92.95	2490
		GCA_002711455.1_ASM271145v1	Tara Oceans South Pacific	No	Yes	No	d__Bacteria;p__Bacteroidota;c__Bacteroidia;o__Flavobacteriales;f__Flavobacteriaceae;g__Muricauda_A;s__Muricauda_A lutaonensis	93.01	99.01	1.2	60	3478601	1021	20	20	286257	286257	173930	173879	612096	611697	44.6	1.35	92.18	3190
		GCA_002711525.1_ASM271152v1	Tara Oceans South Pacific	No	Yes	No	d__Bacteria;p__Planctomycetota;c__Planctomycetes;o__Pirellulales;f__UBA7805;g__UBA7805;s__UBA7805 sp002480485	83.84	89.59	1.15	100	3293198	4955	40	40	126595	126595	82329	82206	403928	403496	51.7	1.73	89.72	2668
		GCA_002711555.1_ASM271155v1	Tara Oceans South Pacific	No	Yes	No	d__Bacteria;p__Proteobacteria;c__Alphaproteobacteria;o__UBA8366;f__UBA8366;g__UBA8366;s__UBA8366 sp002711555	72.78	93.48	4.14	80	2740912	7388	31	31	115236	114858	88416	88178	206220	205960	45.2	0.7	90.6	2562
		GCA_002711615.1_ASM271161v1	Tara Oceans South Pacific	No	Yes	No	d__Bacteria;p__Bacteroidota;c__Rhodothermia;o__Rhodothermales;f__Rubricoccaceae;g__Rubrivirga;s__Rubrivirga sp002283555	81.52	97.27	3.15	71.43	4856351	2271	51	51	129303	129271	95222	95178	439087	438959	71.3	1.21	91.02	4207
		GCA_002715265.1_ASM271526v1	Tara Oceans South Pacific	No	Yes	No	d__Bacteria;p__Proteobacteria;c__Alphaproteobacteria;o__TMED109;f__TMED109;g__GCA-002727615;s__GCA-002727615 sp002715265	61.1	85.3	4.84	83.33	1668993	2517	45	45	45913	45836	37088	37032	132052	131931	29.8	3.93	95.35	1711
		GCA_002715465.1_ASM271546v1	Tara Oceans South Pacific	No	Yes	No	d__Bacteria;p__Marinisomatota;c__Marinisomatia;o__Marinisomatales;f__S15-B10;g__GCA-2715465;s__GCA-2715465 sp002715465	51.35	95.6	8.85	66.67	2450610	1238	37	37	97562	97497	66232	66199	292474	292425	34.2	2.47	94.35	2147
		GCA_002715485.1_ASM271548v1	Tara Oceans South Pacific	No	Yes	No	d__Bacteria;p__Bacteroidota;c__Bacteroidia;o__Flavobacteriales;f__Flavobacteriaceae;g__Aequorivita;s__Aequorivita sp002715485	87.13	91.58	0.89	50	2802668	1755	70	70	44465	44461	40038	40013	146506	146491	38	1.12	92.46	2630
		GCA_002715505.1_ASM271550v1	Tara Oceans South Pacific	No	Yes	No	d__Bacteria;p__Proteobacteria;c__Alphaproteobacteria;o__TMED109;f__TMED131;g__GCA-2715505;s__GCA-2715505 sp002715505	85.31	90.81	1.1	0	1695481	323	31	31	70464	70420	54692	54682	183688	183672	29.5	6.04	95.29	1780
		GCA_002715585.1_ASM271558v1	Tara Oceans South Pacific	No	Yes	No	d__Bacteria;p__Dadabacteria;c__UBA1144;o__UBA1144;f__UBA1144;g__GCA-002715585;s__GCA-002715585 sp002715585	77.48	86.13	1.73	25	1781988	3273	45	45	45965	45675	39599	39527	313506	312955	33	3.8	96.62	1970
		GCA_002715605.1_ASM271560v1	Tara Oceans South Pacific	No	Yes	No	d__Bacteria;p__Bacteroidota;c__Bacteroidia;o__Flavobacteriales;f__Flavobacteriaceae;g__Pseudozobellia;s__Pseudozobellia sp002320855	71.85	99.65	5.56	73.68	4898945	1061	30	30	249789	249766	163298	163262	640781	640731	40.2	4.28	91.62	4273
		GCA_002715685.1_ASM271568v1	Tara Oceans South Pacific	No	Yes	No	d__Bacteria;p__Proteobacteria;c__Gammaproteobacteria;o__Pseudomonadales;f__Alcanivoracaceae;g__Alcanivorax;s__Alcanivorax sp002354605	79.43	95.23	3.16	66.67	3563167	30884	47	48	108829	105677	75812	73589	229504	227769	64.7	2.05	90.33	3292
		GCA_002715705.1_ASM271570v1	Tara Oceans South Pacific	No	Yes	No	d__Bacteria;p__Chloroflexota;c__Dehalococcoidia;o__SAR202;f__UBA826;g__AG-426-M11;s__AG-426-M11 sp003213095	71.43	88.78	3.47	11.11	1354892	12562	21	21	83715	82728	64518	63920	189293	187209	34.3	0.95	94.5	1371
		GCA_002715765.1_ASM271576v1	Tara Oceans South Pacific	No	Yes	No	d__Bacteria;p__Proteobacteria;c__Alphaproteobacteria;o__Parvibaculales;f__Parvibaculaceae;g__Mf105b01;s__Mf105b01 sp002715765	77.09	96.64	3.91	90	3649144	12200	59	59	93019	92852	61849	61643	230130	229090	55.9	0.98	90.21	3501
		GCA_002715825.1_ASM271582v1	Tara Oceans South Pacific	No	Yes	No	d__Bacteria;p__Verrucomicrobiota;c__Verrucomicrobiae;o__Verrucomicrobiales;f__Akkermansiaceae;g__Roseibacillus;s__Roseibacillus sp002715825	78.49	89.39	2.18	93.33	3645475	13856	48	48	98695	98020	75947	75658	360019	358831	54.3	1.03	92.3	2874
		GCA_002715965.1_ASM271596v1	Tara Oceans South Pacific	No	Yes	No	d__Bacteria;p__Verrucomicrobiota;c__Verrucomicrobiae;o__Pedosphaerales;f__GCA-2715965;g__GCA-2715965;s__GCA-2715965 sp002715965	83.47	95.27	2.36	25	6081546	221	101	101	90505	90485	60213	60211	236612	236590	56.5	3.09	90.82	5126
		GCA_002716005.1_ASM271600v1	Tara Oceans South Pacific	No	Yes	No	d__Bacteria;p__Bacteroidota;c__Bacteroidia;o__Flavobacteriales;f__Flavobacteriaceae;g__Leeuwenhoekiella;s__Leeuwenhoekiella palythoae	66.56	91.51	4.99	54.55	3674042	14286	88	88	49922	49776	41750	41588	266420	266400	40.1	1.29	92.1	3286
		GCA_002716045.1_ASM271604v1	Tara Oceans South Pacific	No	Yes	No	d__Bacteria;p__Verrucomicrobiota;c__Verrucomicrobiae;o__Opitutales;f__MB11C04;g__UBA2993;s__UBA2993 sp002716045	53.91	98.31	8.88	68	3920992	3129	60	60	90271	90248	65349	65297	302980	302714	51.5	6.76	94.67	3191
		GCA_002716065.1_ASM271606v1	Tara Oceans South Pacific	No	Yes	No	d__Bacteria;p__Bacteroidota;c__Bacteroidia;o__Flavobacteriales;f__UBA10066;g__GCA-2716065;s__GCA-2716065 sp002716065	76.51	90.86	2.87	86.67	2327368	521	56	56	51424	51424	41560	41550	122630	122583	32.6	1.26	95.6	2058
		GCA_002716125.1_ASM271612v1	Tara Oceans South Pacific	No	Yes	No	d__Bacteria;p__Proteobacteria;c__Alphaproteobacteria;o__UBA8366;f__UBA8366;g__UBA6544;s__UBA6544 sp002716125	78.06	89.06	2.2	0	4782217	360	89	89	68068	68039	53732	53728	171867	171863	57.4	2.1	92.51	4813
		GCA_002716175.1_ASM271617v1	Tara Oceans South Pacific	No	Yes	No	d__Bacteria;p__Proteobacteria;c__Alphaproteobacteria;o__Caulobacterales;f__Maricaulaceae;g__Oceanicaulis;s__Oceanicaulis sp000152745	85.25	97.6	2.47	66.67	3401106	1449	50	50	107738	107714	68022	67993	228216	228204	63.7	1.66	91.43	3296
		GCA_002716225.1_ASM271622v1	Tara Oceans South Pacific	No	Yes	No	d__Bacteria;p__Bacteroidota;c__Bacteroidia;o__Flavobacteriales;f__Flavobacteriaceae;g__Croceibacter;s__Croceibacter atlanticus	86.19	99.54	2.67	89.29	2932452	5801	21	21	277290	277046	139640	139364	550766	549858	33.7	1.8	93.04	2708
		GCA_002716245.1_ASM271624v1	Tara Oceans South Pacific	No	Yes	No	d__Bacteria;p__Proteobacteria;c__Gammaproteobacteria;o__Pseudomonadales;f__Alcanivoracaceae;g__Alcanivorax;s__Alcanivorax jadensis	71.68	87.73	3.21	75	3029302	4037	59	59	83875	83875	51344	51275	178350	178151	58.6	1.37	87.98	2783
		GCA_002716265.1_ASM271626v1	Tara Oceans South Pacific	No	Yes	No	d__Bacteria;p__Proteobacteria;c__Alphaproteobacteria;o__Rhodobacterales;f__Rhodobacteraceae;g__Sulfitobacter;s__Sulfitobacter pontiacus	63.42	86.97	4.71	100	2980545	16168	44	44	81866	81469	67739	67372	272821	271378	61	1.19	91.73	2907
		GCA_002716345.1_ASM271634v1	Tara Oceans South Pacific	No	Yes	No	d__Bacteria;p__Bacteroidota;c__Bacteroidia;o__Flavobacteriales;f__BACL11;g__GCA-2716345;s__GCA-2716345 sp002716345	69.91	88.71	3.76	62.5	1497536	19475	25	25	93441	92315	59901	59122	154014	152051	29.7	1.62	96.95	1386
		GCA_002716355.1_ASM271635v1	Tara Oceans South Pacific	No	Yes	No	d__Bacteria;p__UBP7;c__UBA6624;o__UBA6624;f__UBA6624;g__UBA6624;s__UBA6624 sp002716355	89.5	89.5	0	0	1264697	489	16	16	151459	151367	79043	79013	367145	367145	35.9	3.54	97.56	1232
		GCA_002716465.1_ASM271646v1	Tara Oceans South Pacific	No	Yes	No	d__Bacteria;p__Proteobacteria;c__Alphaproteobacteria;o__Micavibrionales;f__Micavibrionaceae;g__UBA6929;s__UBA6929 sp002448815	78	87.4	1.88	0	1821255	23	12	12	311792	311792	151771	151769	643484	643484	47.8	3.49	93.02	1718
		GCA_002716505.1_ASM271650v1	Tara Oceans South Pacific	No	Yes	No	d__Bacteria;p__Proteobacteria;c__Alphaproteobacteria;o__Rhizobiales;f__TMED25;g__TMED25;s__TMED25 sp002168075	65.31	95.01	5.94	0	1574062	29	20	20	188156	188153	78703	78701	250452	250448	33.2	1.42	94.7	1658
		GCA_002716545.1_ASM271654v1	Tara Oceans South Pacific	No	Yes	No	d__Bacteria;p__Proteobacteria;c__Gammaproteobacteria;o__Methylococcales;f__Cycloclasticaceae;g__Cycloclasticus;s__Cycloclasticus sp002700385	90.28	98.33	1.61	0	2350912	8	20	20	159377	159374	117545	117545	360314	360313	42.8	1.91	92.31	2304
		GCA_002716625.1_ASM271662v1	Tara Oceans South Pacific	No	Yes	No	d__Bacteria;p__Planctomycetota;c__Phycisphaerae;o__Phycisphaerales;f__Phycisphaeraceae;g__UBA6626;s__UBA6626 sp002716625	89.49	89.49	0	0	3354005	78	83	83	51844	51844	40409	40408	148909	148909	50.9	1.25	89.34	2929
		GCA_002716865.1_ASM271686v1	Tara Oceans South Pacific	No	Yes	No	d__Bacteria;p__Chloroflexota;c__Dehalococcoidia;o__UBA1151;f__TMED-70;g__GCA-002700125;s__	45	90.1	9.02	94.74	1292318	4301	20	20	126589	125680	64615	64400	225001	224526	33.1	1.43	95.69	1336
		GCA_002717045.1_ASM271704v1	Tara Oceans South Pacific	No	Yes	No	d__Bacteria;p__Verrucomicrobiota;c__Verrucomicrobiae;o__Opitutales;f__UBA2995;g__UBA2995;s__UBA2995 sp002346535	53.37	93.92	8.11	0	3249496	351	65	65	68534	68534	49992	49986	255783	255754	47.5	1.19	88.05	3015
		GCA_002717105.1_ASM271710v1	Tara Oceans South Pacific	No	Yes	No	d__Bacteria;p__Proteobacteria;c__Alphaproteobacteria;o__UBA2966;f__UBA2966;g__UBA2966;s__UBA2966 sp002348365	52.2	100	9.56	0	4136009	466	36	36	316830	316830	114889	114876	440309	440309	57.9	2.47	90.11	4276
		GCA_002717125.1_ASM271712v1	Tara Oceans South Pacific	No	Yes	No	d__Bacteria;p__Proteobacteria;c__Gammaproteobacteria;o__Pseudomonadales;f__HTCC2089;g__UBA2965;s__UBA2965 sp002348385	66.36	85.71	3.87	6.25	3238912	1172	23	23	207537	207496	140822	140771	449275	449183	61.3	1.06	92.51	3137
		GCA_002717205.1_ASM271720v1	Tara Oceans South Pacific	No	Yes	No	d__Bacteria;p__Chloroflexota;c__Dehalococcoidia;o__UBA1151;f__Bin127;g__UBA1328;s__UBA1328 sp002306815	68.32	88.12	3.96	100	2007118	678	15	15	290226	290107	133807	133762	592423	592423	51.4	3.22	87.52	1879
		GCA_002717245.1_ASM271724v1	Tara Oceans South Pacific	No	Yes	No	d__Bacteria;p__Proteobacteria;c__Alphaproteobacteria;o__GCA-002720895;f__GCA-002720895;g__GCA-002720895;s__GCA-002720895 sp002717245	75.26	91.76	3.3	33.33	1144502	1590	27	27	49376	49315	42388	42330	139778	139737	25.7	1.15	96.07	1238
		GCA_002717285.1_ASM271728v1	Tara Oceans South Pacific	No	Yes	No	d__Bacteria;p__Proteobacteria;c__Alphaproteobacteria;o__Rhodospirillales_A;f__2-02-FULL-58-16_A;g__GCA-2717285;s__GCA-2717285 sp002717285	64.29	87.94	4.73	83.33	2030970	629	19	19	141837	141771	106893	106860	389389	389303	40.6	2	88.75	1922
		GCA_002717465.1_ASM271746v1	Tara Oceans South Pacific	No	Yes	No	d__Bacteria;p__Chloroflexota;c__Dehalococcoidia;o__SAR202;f__UBA826;g__GCA-2717465;s__GCA-2717465 sp002717465	79.66	90.56	2.18	66.67	1985284	9431	35	35	73879	73714	56722	56452	195199	194085	40.2	0.9	92.51	1919
		GCA_002717485.1_ASM271748v1	Tara Oceans South Pacific	No	Yes	No	d__Bacteria;p__Proteobacteria;c__Alphaproteobacteria;o__HIMB59;f__GCA-002718135;g__GCA-2717485;s__GCA-2717485 sp002717485	89.16	89.16	0	0	1404973	302	24	24	84432	84310	58540	58527	289630	289630	29.5	2.7	96.02	1457
		GCA_002717515.1_ASM271751v1	Tara Oceans South Pacific	No	Yes	No	d__Bacteria;p__Bacteroidota;c__Bacteroidia;o__Flavobacteriales;f__GCA-002722245;g__GCA-002722245;s__GCA-002722245 sp002717515	87.6	90.3	0.54	0	2643743	1545	26	26	155262	155262	101682	101623	432837	432377	33.9	1.03	93.52	2259
		GCA_002717545.1_ASM271754v1	Tara Oceans South Pacific	No	Yes	No	d__Bacteria;p__Proteobacteria;c__Alphaproteobacteria;o__UBA6615;f__UBA6615;g__UBA6615;s__UBA6615 sp002937505	85.48	85.48	0	0	2135264	27	13	13	248524	248524	164251	164249	571184	571184	39.7	0.92	91.83	2029
		GCA_002717565.1_ASM271756v1	Tara Oceans South Pacific	No	Yes	No	d__Bacteria;p__Chloroflexota;c__Dehalococcoidia;o__GCA-2717565;f__GCA-2717565;g__GCA-2717565;s__GCA-2717565 sp002717565	69.83	93.23	4.68	0	1683532	13127	32	32	63877	63248	52610	52200	373993	370313	46.9	3.25	91.05	1635
		GCA_002717625.1_ASM271762v1	Tara Oceans South Pacific	No	Yes	No	d__Bacteria;p__Marinisomatota;c__Marinisomatia;o__SCGC-AAA003-L08;f__GCA-002707645;g__GCA-2717625;s__GCA-2717625 sp002717625	86.41	87.91	0.3	100	1490868	78	23	23	89051	89051	64820	64816	288132	288131	29	1.71	96.63	1341
		GCA_002717655.1_ASM271765v1	Tara Oceans South Pacific	No	Yes	No	d__Bacteria;p__Planctomycetota;c__Phycisphaerae;o__Phycisphaerales;f__SM1A02;g__UBA1668;s__UBA1668 sp002717655	84.06	93.11	1.81	0	3067623	64	55	55	69545	69545	55774	55773	352932	352932	55.2	1.34	93.26	2628
		GCA_002717895.1_ASM271789v1	Tara Oceans South Pacific	No	Yes	No	d__Bacteria;p__Proteobacteria;c__Alphaproteobacteria;o__Nisaeales;f__Nisaeaceae;g__GCA-002701455;s__	41.67	88.42	9.35	0	3190436	0	60	60	72467	72467	53173	53173	211643	211643	43.7	1.13	91.48	3005
		GCA_002717955.1_ASM271795v1	Tara Oceans South Pacific	No	Yes	No	d__Bacteria;p__Proteobacteria;c__Gammaproteobacteria;o__Pseudomonadales;f__Oleiphilaceae;g__Tamilnaduibacter;s__Tamilnaduibacter sp002717955	91.29	99.14	1.57	76.47	4100193	464	27	27	234456	234456	151859	151841	628013	628011	55.6	1.29	89.59	3698
		GCA_002718095.1_ASM271809v1	Tara Oceans South Pacific	No	Yes	No	d__Bacteria;p__Chloroflexota;c__Dehalococcoidia;o__SAR202;f__UBA826;g__UBA826;s__UBA826 sp002718095	90.75	91.75	0.2	0	1437644	12996	10	10	374497	370763	143764	142464	453604	449214	34.5	1.16	94.38	1442
		GCA_002718115.1_ASM271811v1	Tara Oceans South Pacific	No	Yes	No	d__Bacteria;p__Proteobacteria;c__Gammaproteobacteria;o__Enterobacterales;f__Alteromonadaceae;g__Idiomarina;s__Idiomarina abyssalis	98.93	99.78	0.17	0	2653514	6339	9	9	404739	403817	294834	294130	522845	522132	47.1	0.61	93.71	2533
		GCA_002718155.1_ASM271815v1	Tara Oceans South Pacific	No	Yes	No	d__Bacteria;p__Proteobacteria;c__Gammaproteobacteria;o__UBA10353;f__LS-SOB;g__UBA9619;s__UBA9619 sp002718155	67.67	89.02	4.27	77.78	3203335	7730	84	84	48797	48711	38134	38042	153286	152845	56.9	2.09	91.28	2998
		GCA_002718175.1_ASM271817v1	Tara Oceans South Pacific	No	Yes	No	d__Bacteria;p__Verrucomicrobiota;c__Verrucomicrobiae;o__Verrucomicrobiales;f__Akkermansiaceae;g__Roseibacillus;s__Roseibacillus sp002501065	67.54	87.94	4.08	85.71	4523946	6215	113	113	52089	52051	40034	39979	171640	171572	60.2	2.19	91.33	3361
		GCA_002718285.1_ASM271828v1	Tara Oceans South Pacific	No	Yes	No	d__Bacteria;p__Marinisomatota;c__Marinisomatia;o__Marinisomatales;f__UBA1611;g__UBA2134;s__UBA2134 sp002718285	79.11	90.11	2.2	0	3031464	8952	43	43	92674	92370	70499	70290	393119	391280	33	3.79	94.81	2669
		GCA_002718345.1_ASM271834v1	Tara Oceans South Pacific	No	Yes	No	d__Bacteria;p__Proteobacteria;c__Gammaproteobacteria;o__UBA6522;f__UBA6522;g__UBA6522;s__UBA6522 sp002718345	81.33	89.73	1.68	0	2293790	212	64	64	49736	49736	35840	35837	121131	121131	42.1	2.46	93.29	2197
		GCA_002718515.1_ASM271851v1	Tara Oceans South Pacific	No	Yes	No	d__Bacteria;p__Planctomycetota;c__Phycisphaerae;o__Phycisphaerales;f__SM1A02;g__GCA-002718515;s__GCA-002718515 sp002718515	54.21	85.46	6.25	71.43	1946822	19446	43	43	62531	61666	45274	44822	153181	151117	45.3	5.38	94.82	1797
		GCA_002718585.1_ASM271858v1	Tara Oceans South Pacific	No	Yes	No	d__Bacteria;p__Marinisomatota;c__Marinisomatia;o__SCGC-AAA003-L08;f__GCA-002707645;g__GCA-002718585;s__GCA-002718585 sp002718585	56.61	86.81	6.04	0	1457926	11746	35	35	49880	49305	41655	41319	115311	115135	28.1	2.09	96.99	1385
		GCA_002718595.1_ASM271859v1	Tara Oceans South Pacific	No	Yes	No	d__Bacteria;p__Gemmatimonadota;c__Gemmatimonadetes;o__SG8-23;f__UBA6960;g__GCA-2718595;s__GCA-2718595 sp002718595	83.44	94.44	2.2	0	2021477	11498	7	7	439213	437139	288782	287139	632637	629500	45.3	1.57	93.32	1788
		GCA_002718645.1_ASM271864v1	Tara Oceans South Pacific	No	Yes	No	d__Bacteria;p__Bacteroidota;c__Bacteroidia;o__Flavobacteriales;f__Flavobacteriaceae;g__GCA-002728855;s__	47.79	88.24	8.09	64.29	1749664	5413	38	38	54976	54953	46043	45901	146199	145838	30.9	2.09	95.66	1565
		GCA_002718815.1_ASM271881v1	Tara Oceans South Pacific	No	Yes	No	d__Bacteria;p__Planctomycetota;c__Planctomycetes;o__Pirellulales;f__Pirellulaceae;g__GCA-2718815;s__GCA-2718815 sp002726515	56.44	94.74	7.66	0	6383855	44	114	114	92748	92748	55998	55998	383879	383845	55.3	2.88	85.61	4873
		GCA_002719095.1_ASM271909v1	Tara Oceans South Pacific	No	Yes	No	d__Bacteria;p__Marinisomatota;c__Marinisomatia;o__SCGC-AAA003-L08;f__GCA-002719095;g__GCA-002719095;s__GCA-002719095 sp002719095	53.86	92.31	7.69	100	1455214	6506	36	36	60264	59951	40422	40241	119149	118718	31.1	1.89	96.87	1353
		GCA_002719195.1_ASM271919v1	Tara Oceans South Pacific	No	Yes	No	d__Bacteria;p__Proteobacteria;c__Alphaproteobacteria;o__Rhizobiales;f__TMED25;g__AG-430-B22;s__	41.24	85.09	8.77	93.75	1524246	3759	28	28	60600	60462	54437	54303	203451	202763	32.5	1.07	95.93	1535
		GCA_002719315.1_ASM271931v1	Tara Oceans South Pacific	No	Yes	No	d__Bacteria;p__Bacteroidota;c__Bacteroidia;o__Flavobacteriales;f__Flavobacteriaceae;g__GCA-2719315;s__GCA-2719315 sp002719315	50.99	93.79	8.56	20	2102722	12782	17	17	311246	309376	123689	122937	388307	386109	28	1.37	95.25	1891
		GCA_002719335.1_ASM271933v1	Tara Oceans South Pacific	No	Yes	No	d__Bacteria;p__Actinobacteriota;c__Acidimicrobiia;o__Microtrichales;f__TK06;g__UBA2110;s__UBA2110 sp002719335	75	85.7	2.14	0	2319253	1303	50	50	64256	64242	46385	46359	258045	258039	54.2	7.08	93.6	2372
		GCA_002719495.1_ASM271949v1	Tara Oceans South Pacific	No	Yes	No	d__Bacteria;p__Proteobacteria;c__Alphaproteobacteria;o__Sphingomonadales;f__Sphingomonadaceae;g__Erythrobacter_A;s__Erythrobacter_A sp002695185	51.21	90.16	7.79	80	2758833	3926	58	58	59545	59523	47566	47498	156318	156218	59.8	1.76	91.56	2680
		GCA_002719535.1_ASM271953v1	Tara Oceans South Pacific	No	Yes	No	d__Bacteria;p__Bacteroidota;c__Bacteroidia;o__Flavobacteriales;f__Flavobacteriaceae;g__Mesonia;s__Mesonia sp002413625	51.73	94.83	8.62	100	3364662	2080	38	38	132738	132682	88543	88489	267419	267247	34.7	1	90.49	3153
		GCA_002719675.1_ASM271967v1	Tara Oceans South Pacific	No	Yes	No	d__Bacteria;p__Chloroflexota;c__Dehalococcoidia;o__SAR202;f__GCA-2719675;g__GCA-2719675;s__GCA-2719675 sp002719675	92.83	92.83	0	0	1403377	646	19	19	113503	113437	73861	73827	337684	337261	32.6	1	92.76	1356
		GCA_002719735.1_ASM271973v1	Tara Oceans South Pacific	No	Yes	No	d__Bacteria;p__Proteobacteria;c__Gammaproteobacteria;o__Pseudomonadales;f__Alcanivoracaceae;g__Alcanivorax;s__Alcanivorax sp002313655	94.94	98.64	0.74	0	4535791	24096	59	59	116833	116476	76877	76469	269307	267889	65.6	4.85	90.07	4251
		GCA_002719855.1_ASM271985v1	Tara Oceans South Pacific	No	Yes	No	d__Bacteria;p__Proteobacteria;c__Gammaproteobacteria;o__Legionellales;f__Legionellaceae;g__GCA-2863045;s__GCA-2863045 sp002863045	57.71	85.96	5.65	37.5	1744466	504	17	17	132363	132024	102615	102586	316138	316138	39.4	1.25	92.78	1669
		GCA_002719885.1_ASM271988v1	Tara Oceans South Pacific	No	Yes	No	d__Bacteria;p__Proteobacteria;c__Alphaproteobacteria;o__Defluviicoccales;f__UBA2964;g__UBA2964;s__UBA2964 sp002719885	50.85	92.25	8.28	40	2784006	11787	52	52	62882	62552	53538	53311	221068	219774	41.9	2.39	91.89	2727
		GCA_002719895.1_ASM271989v1	Tara Oceans South Pacific	No	Yes	No	d__Bacteria;p__Bacteroidota;c__Bacteroidia;o__Flavobacteriales;f__BACL11;g__UBA7312;s__UBA7312 sp002471645	48.92	94.62	9.14	19.05	1778411	2219	32	32	74325	74212	55575	55506	150125	150082	34.7	2.1	95.42	1665
		GCA_002719955.1_ASM271995v1	Tara Oceans South Pacific	No	Yes	No	d__Bacteria;p__Myxococcota;c__UBA9160;o__UBA9160;f__UBA4427;g__UBA4427;s__UBA4427 sp002719955	64.85	90.65	5.16	0	5851096	145	77	77	122618	122584	75988	75986	427728	427723	63.3	1.15	88.34	5257
		GCA_002720045.1_ASM272004v1	Tara Oceans South Pacific	No	Yes	No	d__Bacteria;p__Actinobacteriota;c__Acidimicrobiia;o__Microtrichales;f__MedAcidi-G1;g__UBA9410;s__UBA9410 sp002727895	55.13	87.18	6.41	25	2719402	3674	49	49	74618	74489	55498	55423	167815	167214	68.3	6.64	92.72	2657
		GCA_002720175.1_ASM272017v1	Tara Oceans South Pacific	No	Yes	No	d__Bacteria;p__Myxococcota;c__UBA796;o__UBA9615;f__UBA9615;g__UBA6601;s__UBA6601 sp002433485	62.76	90.21	5.49	12.5	4470947	268	61	61	106470	106470	73294	73289	428177	428177	60.6	1.76	94.48	3574
		GCA_002720235.1_ASM272023v1	Tara Oceans South Pacific	No	Yes	No	d__Bacteria;p__Proteobacteria;c__Alphaproteobacteria;o__Caulobacterales;f__Hyphomonadaceae;g__Henriciella;s__Henriciella sp002733705	61.42	90.17	5.75	92.31	3248353	14837	56	56	78051	77558	58006	57741	222266	221210	61.3	1.17	91.73	3175
		GCA_002720365.1_ASM272036v1	Tara Oceans South Pacific	No	Yes	No	d__Bacteria;p__Chloroflexota;c__Dehalococcoidia;o__UBA2979;f__UBA2979;g__UBA2979;s__UBA2979 sp002348225	55.27	89.02	6.75	27.27	2005348	12752	49	49	48363	48142	40925	40665	126797	126353	47.5	1.99	93.17	1956
		GCA_002720535.1_ASM272053v1	Tara Oceans South Pacific	No	Yes	No	d__Bacteria;p__Proteobacteria;c__Alphaproteobacteria;o__TMED109;f__TMED109;g__TMED109;s__TMED109 sp002720535	88.89	88.89	0	0	1677714	12096	9	9	390892	387318	186412	185068	536603	532808	29.3	1.54	94.93	1701
		GCA_002720595.1_ASM272059v1	Tara Oceans South Pacific	No	Yes	No	d__Bacteria;p__Proteobacteria;c__Gammaproteobacteria;o__Woeseiales;f__Woeseiaceae;g__SZUA-117;s__	47.42	90.52	8.62	0	3127694	989	39	39	162278	162278	80197	80171	424196	424196	46.3	2.87	93.29	2810
		GCA_002720735.1_ASM272073v1	Tara Oceans South Pacific	No	Yes	No	d__Bacteria;p__Proteobacteria;c__Gammaproteobacteria;o__Pseudomonadales;f__Porticoccaceae;g__TMED48;s__TMED48 sp002720735	75.48	87.53	2.41	94.12	2111649	9839	60	60	48489	48241	35194	35030	99721	99400	43	2.35	89.29	1914
		GCA_002720745.1_ASM272074v1	Tara Oceans South Pacific	No	Yes	No	d__Bacteria;p__Bacteroidota;c__Rhodothermia;o__Balneolales;f__Balneolaceae;g__UBA1275;s__UBA1275 sp002720745	93.72	95.47	0.35	100	2172123	2813	25	25	175857	175841	86884	86772	546046	545749	37.8	2.05	91.91	1848
		GCA_002720815.1_ASM272081v1	Tara Oceans South Pacific	No	Yes	No	d__Bacteria;p__Acidobacteriota;c__Vicinamibacteria;o__Vicinamibacterales;f__UBA823;g__UBA8106;s__UBA8106 sp002696705	50.27	85.42	7.03	28.57	2418508	28221	57	57	56749	56056	42429	41934	111137	109522	51	3.27	93.37	2173
		GCA_002720855.1_ASM272085v1	Tara Oceans South Pacific	No	Yes	No	d__Bacteria;p__Proteobacteria;c__Alphaproteobacteria;o__Defluviicoccales;f__UBA2964;g__GCA-2720855;s__GCA-2720855 sp002720855	99.78	99.78	0	0	3575202	74	15	15	344231	344222	238346	238341	906923	906923	51	1.36	92.49	3535
		GCA_002720865.1_ASM272086v1	Tara Oceans South Pacific	No	Yes	No	d__Bacteria;p__Bdellovibrionota;c__Bacteriovoracia;o__Bacteriovoracales;f__Bacteriovoracaceae;g__GCA-2720865;s__GCA-2720865 sp002720865	67.74	94.79	5.41	12.5	4908770	238	33	33	305426	305426	148750	148743	1413687	1413685	38.3	3.38	93.92	4916
		GCA_002720975.1_ASM272097v1	Tara Oceans South Pacific	No	Yes	No	d__Bacteria;p__Planctomycetota;c__UBA1135;o__UBA1135;f__GCA-002686595;g__GCA-2720975;s__GCA-2720975 sp002720975	60.94	88.64	5.54	6.25	3580267	338	118	118	33462	33462	30341	30338	126076	126060	64	2.2	93	2821
		GCA_002721105.1_ASM272110v1	Tara Oceans South Pacific	No	Yes	No	d__Bacteria;p__Proteobacteria;c__Gammaproteobacteria;o__UBA10353;f__LS-SOB;g__GCA-2721105;s__GCA-2721105 sp002721105	72.97	94.92	4.39	12.5	2484299	3355	39	39	129115	128801	63699	63613	272937	272498	41.3	3.68	91	2343
		GCA_002721135.1_ASM272113v1	Tara Oceans South Pacific	No	Yes	No	d__Bacteria;p__Proteobacteria;c__Gammaproteobacteria;o__Pseudomonadales;f__Pseudomonadaceae;g__Pseudomonas_A;s__Pseudomonas_A stutzeri_AB	57.68	95.98	7.66	43.75	4617483	30500	59	59	120961	120361	78262	77745	307987	305953	60.6	2.24	89.08	4309
		GCA_002721215.1_ASM272121v1	Tara Oceans South Pacific	No	Yes	No	d__Bacteria;p__Proteobacteria;c__Gammaproteobacteria;o__Pseudomonadales;f__Halomonadaceae;g__Cobetia;s__Cobetia amphilecti	66.71	89.86	4.63	100	3667612	5960	52	52	94593	94256	70531	70416	267990	266963	63	1.68	85.11	3086
		GCA_002721275.1_ASM272127v1	Tara Oceans South Pacific	No	Yes	No	d__Bacteria;p__Bacteroidota;c__Bacteroidia;o__Flavobacteriales;f__Flavobacteriaceae;g__GCA-002723295;s__GCA-002723295 sp002721275	79.39	90.44	2.21	0	1623259	6024	25	25	99118	98721	64930	64689	206232	205677	30.4	0.96	95.4	1532
		GCA_002721295.1_ASM272129v1	Tara Oceans South Pacific	No	Yes	No	d__Bacteria;p__Proteobacteria;c__Alphaproteobacteria;o__Rhodospirillales_A;f__UBA2165;g__GCA-002721295;s__GCA-002721295 sp002937995	63.98	85.48	4.3	50	1764392	15189	53	53	41075	40755	33290	33003	80583	79815	39.4	1.46	93.02	1686
		GCA_002721445.1_ASM272144v1	Tara Oceans South Pacific	No	Yes	No	d__Bacteria;p__Chloroflexota;c__Dehalococcoidia;o__SAR202;f__GCA-002723415;g__GCA-002723415;s__GCA-002723415 sp002721445	94.38	95.38	0.2	0	1712152	2038	18	18	145265	145202	95119	95006	398696	398695	30.5	1.44	93.94	1641
		GCA_002721545.1_ASM272154v1	Tara Oceans South Pacific	No	Yes	No	d__Bacteria;p__Proteobacteria;c__Gammaproteobacteria;o__Burkholderiales;f__Nitrosomonadaceae;g__GCA-2721545;s__GCA-2721545 sp002721545	91.26	93.66	0.48	100	2016084	4102	37	37	98228	98228	54488	54377	221584	221584	37.3	2.71	89.43	1881
		GCA_002721595.1_ASM272159v1	Tara Oceans South Pacific	No	Yes	No	d__Bacteria;p__Proteobacteria;c__Gammaproteobacteria;o__Enterobacterales;f__Alteromonadaceae;g__Idiomarina;s__Idiomarina baltica	75.66	92.91	3.45	78.57	2338586	12784	29	29	110433	110291	80640	80200	206654	205482	47.6	1.6	94.01	2245
		GCA_002721615.1_ASM272161v1	Tara Oceans South Pacific	No	Yes	No	d__Bacteria;p__Chloroflexota;c__Dehalococcoidia;o__UBA1151;f__TMED-70;g__GCA-2721615;s__GCA-2721615 sp002721615	79.54	89.44	1.98	0	1460664	202	27	27	68242	68219	54098	54091	257607	257578	30.3	1.52	94.58	1488
		GCA_002721695.1_ASM272169v1	Tara Oceans South Pacific	No	Yes	No	d__Bacteria;p__Verrucomicrobiota;c__Verrucomicrobiae;o__Verrucomicrobiales;f__Akkermansiaceae;g__Roseibacillus;s__Roseibacillus sp002721695	68.18	88.58	4.08	100	4161290	19607	90	90	52402	52240	46236	46018	201207	200043	60.8	1.06	91.97	3108
		GCA_002721705.1_ASM272170v1	Tara Oceans South Pacific	No	Yes	No	d__Bacteria;p__Verrucomicrobiota;c__Verrucomicrobiae;o__Opitutales;f__MB11C04;g__UBA2993;s__UBA2993 sp002721705	71.39	88.29	3.38	0	3541024	899	95	95	42841	42841	37273	37264	144307	144291	54	2.7	94.57	2884
		GCA_002721725.1_ASM272172v1	Tara Oceans South Pacific	No	Yes	No	d__Bacteria;p__Proteobacteria;c__Alphaproteobacteria;o__Parvibaculales;f__RS24;g__UBA8337;s__UBA8337 sp002721725	88.63	88.63	0	0	1715815	6827	26	26	90299	88854	65992	65730	279454	277982	52.9	1.99	94.18	1664
		GCA_002721785.1_ASM272178v1	Tara Oceans South Pacific	No	Yes	No	d__Bacteria;p__Proteobacteria;c__Gammaproteobacteria;o__Pseudomonadales;f__Halieaceae;g__Luminiphilus;s__Luminiphilus sp002721785	88.64	91.94	0.66	33.33	2717702	634	46	46	71794	71757	59080	59066	514555	514547	57.2	2.55	92.26	2600
		GCA_002721815.1_ASM272181v1	Tara Oceans South Pacific	No	Yes	No	d__Bacteria;p__Myxococcota;c__UBA727;o__UBA727;f__GCA-2721815;g__GCA-2721815;s__GCA-2721815 sp002721815	80.69	91.29	2.12	0	4601103	2059	74	74	79137	79135	62177	62149	367095	366930	51.3	2.44	94.58	3565
		GCA_002721895.1_ASM272189v1	Tara Oceans South Pacific	No	Yes	No	d__Bacteria;p__Verrucomicrobiota;c__Verrucomicrobiae;o__Pedosphaerales;f__UBA1100;g__UBA6614;s__UBA6614 sp002721895	78.39	91.89	2.7	75	3720822	1803	68	68	70096	70096	54717	54691	230356	230327	57.1	2.55	93.98	3231
		GCA_002721995.1_ASM272199v1	Tara Oceans South Pacific	No	Yes	No	d__Bacteria;p__Chloroflexota;c__Dehalococcoidia;o__UBA3495;f__UBA3495;g__UBA9611;s__UBA9611 sp002721995	84.82	89.77	0.99	0	2565722	578	50	50	71586	71583	51314	51302	215833	215829	60.6	2.76	87.68	2530
		GCA_002722055.1_ASM272205v1	Tara Oceans South Pacific	No	Yes	No	d__Bacteria;p__Proteobacteria;c__Alphaproteobacteria;o__GCA-2701885;f__GCA-2701885;g__GCA-2701885;s__GCA-2701885 sp002722055	96.77	96.77	0	0	2156134	1	15	15	172232	172232	143742	143742	568375	568375	31	1.66	94.3	2136
		GCA_002722095.1_ASM272209v1	Tara Oceans South Pacific	No	Yes	No	d__Bacteria;p__Proteobacteria;c__Alphaproteobacteria;o__UBA8366;f__UBA8366;g__UBA8366;s__UBA8366 sp002722095	66.92	97.37	6.09	90.48	3873432	379	25	25	246593	246583	154937	154922	910832	910774	55.8	1.49	93.04	3714
		GCA_002722155.1_ASM272215v1	Tara Oceans South Pacific	No	Yes	No	d__Bacteria;p__Chloroflexota;c__Dehalococcoidia;o__SAR202;f__UBA826;g__UBA11996;s__UBA11996 sp002722155	77.39	87.29	1.98	50	1647144	371	25	25	77583	77572	65885	65870	159299	159297	41.7	0.6	91.62	1611
		GCA_002722165.1_ASM272216v1	Tara Oceans South Pacific	No	Yes	No	d__Bacteria;p__Proteobacteria;c__Alphaproteobacteria;o__Pelagibacterales;f__Pelagibacteraceae;g__HIMB114;s__HIMB114 sp003209195	89.93	90.48	0.11	100	1204724	3005	23	23	77842	77557	52379	52248	145957	145569	28.5	1.55	95.86	1326
		GCA_002722175.1_ASM272217v1	Tara Oceans South Pacific	No	Yes	No	d__Bacteria;p__Proteobacteria;c__Alphaproteobacteria;o__Rhodospirillales_A;f__GCA-2722175;g__GCA-2722175;s__GCA-2722175 sp002722175	68.22	86.27	3.61	0	2793604	428	63	63	64374	64374	44342	44336	216105	216105	43.3	6.77	89.08	2568
		GCA_002722215.1_ASM272221v1	Tara Oceans South Pacific	No	Yes	No	d__Bacteria;p__Bacteroidota;c__Bacteroidia;o__Flavobacteriales;f__TMED113;g__GCA-002701365;s__GCA-002701365 sp002722215	87.87	87.87	0	0	1426555	2305	39	39	49412	49030	36578	36519	109675	109670	31.5	3.05	96.36	1211
		GCA_002722245.1_ASM272224v1	Tara Oceans South Pacific	No	Yes	No	d__Bacteria;p__Bacteroidota;c__Bacteroidia;o__Flavobacteriales;f__GCA-002722245;g__GCA-002722245;s__GCA-002722245 sp002722245	71.5	95.7	4.84	30	3000463	143	34	34	140668	140668	88248	88244	297732	297726	34.7	1.5	93.05	2529
		GCA_002722295.1_ASM272229v1	Tara Oceans South Pacific	No	Yes	No	d__Bacteria;p__Proteobacteria;c__Alphaproteobacteria;o__Rhizobiales;f__Stappiaceae;g__Stappia;s__Stappia sp002722295	73.16	95.31	4.43	56.25	4741554	315	35	35	210283	210283	135472	135463	321755	321736	65.7	1.62	88.73	4363
		GCA_002722335.1_ASM272233v1	Tara Oceans South Pacific	No	Yes	No	d__Bacteria;p__Verrucomicrobiota;c__Verrucomicrobiae;o__Opitutales;f__MB11C04;g__MB11C04;s__MB11C04 sp002364975	72.7	93.1	4.08	100	2773625	11940	73	73	42102	41590	37994	37831	149978	149186	43	2.54	94.48	2342
		GCA_002722455.1_ASM272245v1	Tara Oceans South Pacific	No	Yes	No	d__Bacteria;p__Chloroflexota;c__Dehalococcoidia;o__SAR202;f__GCA-2722455;g__GCA-2722455;s__GCA-2722455 sp002722455	68.98	93.73	4.95	0	2484032	434	30	30	130321	130321	82801	82786	243693	243693	30.9	2.88	89.08	2701
		GCA_002722565.1_ASM272256v1	Tara Oceans South Pacific	No	Yes	No	d__Bacteria;p__Actinobacteriota;c__Acidimicrobiia;o__Microtrichales;f__TK06;g__MedAcidi-G3;s__MedAcidi-G3 sp002722565	82.91	97.86	2.99	25	2467670	3724	22	22	164181	164181	112166	111997	355344	354479	51.9	0.65	94.2	2430
		GCA_002722705.1_ASM272270v1	Tara Oceans South Pacific	No	Yes	No	d__Bacteria;p__Bdellovibrionota;c__Bacteriovoracia;o__UBA1018;f__UBA6935;g__UBA6935;s__UBA6935 sp002722705	73.78	86.88	2.62	0	3997395	65	113	113	42513	42513	35375	35374	186439	186439	39.4	6.93	92.76	3851
		GCA_002722795.1_ASM272279v1	Tara Oceans South Pacific	No	Yes	No	d__Bacteria;p__Bacteroidota;c__Bacteroidia;o__Flavobacteriales;f__UA16;g__UBA974;s__UBA974 sp002722795	85.58	85.58	0	0	1736712	1	33	33	70517	70517	52627	52627	246227	246227	38.5	3.24	95.39	1524
		GCA_002722805.1_ASM272280v1	Tara Oceans South Pacific	No	Yes	No	d__Bacteria;p__Proteobacteria;c__Alphaproteobacteria;o__Caulobacterales;f__Hyphomonadaceae;g__Hyphomonas;s__Hyphomonas sp002700305	78.05	99.5	4.29	45.45	3673197	24119	21	21	290471	288568	174914	173765	572047	568188	61.6	1.41	91.11	3607
		GCA_002722885.1_ASM272288v1	Tara Oceans South Pacific	No	Yes	No	d__Bacteria;p__Proteobacteria;c__Alphaproteobacteria;o__SP197;f__SP197;g__SP197;s__SP197 sp002722885	80.11	98.91	3.76	100	3712544	985	23	23	275899	275829	161414	161372	519209	519036	62.1	0.97	91.47	3892
		GCA_002722965.1_ASM272296v1	Tara Oceans South Pacific	No	Yes	No	d__Bacteria;p__Proteobacteria;c__Gammaproteobacteria;o__Nitrosococcales;f__Methylophagaceae;g__Methylophaga;s__Methylophaga sp002363955	95.88	98.23	0.47	0	3140658	1135	23	23	197236	196959	136550	136501	457021	457021	45.5	1.21	91.57	3100
		GCA_002723015.1_ASM272301v1	Tara Oceans South Pacific	No	Yes	No	d__Bacteria;p__Verrucomicrobiota;c__Verrucomicrobiae;o__Verrucomicrobiales;f__Akkermansiaceae;g__Roseibacillus;s__Roseibacillus sp002723015	65.68	97.28	6.32	94.44	4056388	9785	103	103	46847	46791	39382	39287	152445	152090	56	1.23	92.53	3298
		GCA_002723075.1_ASM272307v1	Tara Oceans South Pacific	No	Yes	No	d__Bacteria;p__Bacteroidota;c__Bacteroidia;o__Flavobacteriales;f__Flavobacteriaceae;g__UBA724;s__UBA724 sp002723075	75.05	88.65	2.72	46.67	1689504	1903	28	28	85971	85879	60339	60271	136942	136853	40.2	2	95.44	1509
		GCA_002723085.1_ASM272308v1	Tara Oceans South Pacific	No	Yes	No	d__Bacteria;p__Bacteroidota;c__Bacteroidia;o__Flavobacteriales;f__UBA10066;g__GCA-2723085;s__GCA-2723085 sp002723085	95.06	95.16	0.02	100	2431853	68	46	46	68930	68930	52866	52864	183967	183967	30	1.11	95.79	2161
		GCA_002723125.1_ASM272312v1	Tara Oceans South Pacific	No	Yes	No	d__Bacteria;p__Chloroflexota;c__Dehalococcoidia;o__UBA3495;f__UBA2588;g__UBA2588;s__UBA2588 sp002723125	88.68	94.63	1.19	50	1660234	12794	18	18	279619	277323	92235	91524	331084	328748	39.9	1.34	94.29	1671
		GCA_002723155.1_ASM272315v1	Tara Oceans South Pacific	No	Yes	No	d__Bacteria;p__Proteobacteria;c__Alphaproteobacteria;o__Caulobacterales;f__Hyphomonadaceae;g__Ponticaulis;s__Ponticaulis sp002723155	88.54	98.94	2.08	27.78	3843638	544	18	18	400483	400443	213535	213505	964632	964598	55.5	3.04	91.38	3767
		GCA_002723175.1_ASM272317v1	Tara Oceans South Pacific	No	Yes	No	d__Bacteria;p__Bacteroidota;c__Bacteroidia;o__Flavobacteriales;f__UA16;g__UA16;s__UA16 sp002420235	74.19	92.99	3.76	87.5	2305420	14610	47	47	59554	59241	49051	48740	336578	334879	48.2	4.08	95.01	2011
		GCA_002723205.1_ASM272320v1	Tara Oceans South Pacific	No	Yes	No	d__Bacteria;p__Proteobacteria;c__Gammaproteobacteria;o__Enterobacterales;f__Alteromonadaceae;g__Paraglaciecola;s__Paraglaciecola agarilytica	94.26	95.96	0.34	0	5656820	173	75	75	106594	106594	75424	75421	275592	275592	43.9	1.77	87.89	4929
		GCA_002723235.1_ASM272323v1	Tara Oceans South Pacific	No	Yes	No	d__Bacteria;p__Proteobacteria;c__Gammaproteobacteria;o__Pseudomonadales;f__Spongiibacteraceae;g__UBA5047;s__UBA5047 sp002415025	54.91	98.71	8.76	88.46	4460577	350	34	34	182327	182324	131193	131183	789526	789420	55.3	1.07	91.69	4155
		GCA_002723255.1_ASM272325v1	Tara Oceans South Pacific	No	Yes	No	d__Bacteria;p__Proteobacteria;c__Alphaproteobacteria;o__Rhizobiales;f__Devosiaceae;g__Pelagibacterium;s__Pelagibacterium sp002723255	85.51	89.61	0.82	0	3020114	205	80	80	50062	50062	37751	37748	170658	170647	60.6	3.1	89.82	3050
		GCA_002723275.1_ASM272327v1	Tara Oceans South Pacific	No	Yes	No	d__Bacteria;p__Planctomycetota;c__Planctomycetes;o__Pirellulales;f__Pirellulaceae;g__GCA-2723275;s__GCA-2723275 sp002723275	69.08	98.78	5.94	50	6798689	6587	47	47	228818	228564	144652	144512	493560	492735	52.8	0.82	88.27	5059
		GCA_002723305.1_ASM272330v1	Tara Oceans South Pacific	No	Yes	No	d__Bacteria;p__Planctomycetota;c__Phycisphaerae;o__Phycisphaerales;f__SM1A02;g__UBA1924;s__UBA1924 sp002364005	50	95.45	9.09	100	3744199	154	22	22	382175	382124	170190	170183	744691	744663	61.5	1	90.15	3207
		GCA_002723335.1_ASM272333v1	Tara Oceans South Pacific	No	Yes	No	d__Bacteria;p__Proteobacteria;c__Gammaproteobacteria;o__Pseudomonadales;f__Halieaceae;g__Haliea;s__Haliea sp002416125	91.42	99.57	1.63	0	3734379	1920	21	21	250510	250503	177827	177736	551985	551662	61.6	5.67	92.56	3444
		GCA_002723415.1_ASM272341v1	Tara Oceans South Pacific	No	Yes	No	d__Bacteria;p__Chloroflexota;c__Dehalococcoidia;o__SAR202;f__GCA-002723415;g__GCA-002723415;s__GCA-002723415 sp002723415	88.77	89.77	0.2	0	1860284	1503	37	37	92056	92056	50277	50237	116443	116443	30.3	1.42	94.33	1812
		GCA_002723655.1_ASM272365v1	Tara Oceans South Pacific	No	Yes	No	d__Bacteria;p__Proteobacteria;c__Alphaproteobacteria;o__Sphingomonadales;f__Sphingomonadaceae;g__Erythrobacter_A;s__Erythrobacter_A sp002723655	71.21	92.46	4.25	62.96	2948989	19579	22	22	174627	173782	134044	133155	367235	364994	62.5	0.86	91.86	2876
		GCA_002689195.1_ASM268919v1	Tara Oceans Mediterranean	No	Yes	No	d__Bacteria;p__Proteobacteria;c__Alphaproteobacteria;o__Parvibaculales;f__RS24;g__UBA7378;s__UBA7378	75.04	90.94	3.18	57.14	1478689	17324	43	43	41153	40680	34388	33985	134370	132066	56.4	4.16	93.7	1492
		GCA_002689225.1_ASM268922v1	Tara Oceans Mediterranean	No	Yes	No	d__Bacteria;p__Proteobacteria;c__Alphaproteobacteria;o__Rhizobiales;f__Xanthobacteraceae;g__Afipia;s__Afipia	91.75	98.1	1.27	50	5163516	220	49	49	161090	161090	105377	105373	414128	414124	61.4	2.12	88	4978
		GCA_002689305.1_ASM268930v1	Tara Oceans Mediterranean	No	Yes	No	d__Bacteria;p__Proteobacteria;c__Alphaproteobacteria;o__Puniceispirillales;f__UBA1172;g__UBA1172;s__UBA1172	64.27	86.02	4.35	100	1636955	2823	24	24	81903	81762	68206	68088	157143	157016	57.4	1.22	92.85	1615
		GCA_002689325.1_ASM268932v1	Tara Oceans Mediterranean	No	Yes	No	d__Bacteria;p__Proteobacteria;c__Alphaproteobacteria;o__TMED127;f__TMED127;g__GCA-002690875;s__GCA-002690875	89.01	94.51	1.1	0	1307145	3	46	46	36261	36261	28416	28416	84211	84211	29.5	1.72	96.07	1460
		GCA_002689385.1_ASM268938v1	Tara Oceans Mediterranean	No	Yes	No	d__Bacteria;p__Planctomycetota;c__Phycisphaerae;o__Phycisphaerales;f__SM1A02;g__GCA-002718515;s__GCA-002718515	73.86	90.91	3.41	0	1937263	619	87	87	31039	31036	22267	22260	92627	92610	45.1	1.96	93.6	1771
		GCA_002689395.1_ASM268939v1	Tara Oceans Mediterranean	No	Yes	No	d__Bacteria;p__Proteobacteria;c__Alphaproteobacteria;o__Caulobacterales;f__Hyphomonadaceae;g__Hyphomonas;s__Hyphomonas	79.64	93.99	2.87	88.89	3141579	13507	114	114	35583	35402	27557	27439	140899	140171	58.4	1.98	92.42	3104
		GCA_002689445.1_ASM268944v1	Tara Oceans Mediterranean	No	Yes	No	d__Bacteria;p__Proteobacteria;c__Gammaproteobacteria;o__Pseudomonadales;f__HTCC2089;g__UBA9926;s__UBA9926	77.23	89.88	2.53	10	3208306	515	105	105	59504	59490	30555	30550	217339	217320	51.5	1.54	89.15	2956
		GCA_002689605.1_ASM268960v1	Tara Oceans Mediterranean	No	Yes	No	d__Bacteria;p__Proteobacteria;c__Alphaproteobacteria;o__Rhizobiales;f__Hyphomicrobiaceae;g__GCA-2689605;s__GCA-2689605	83.79	96.09	2.46	70	4964254	18997	168	168	39645	39431	29549	29436	147743	147181	53.6	1.17	86.28	5050
		GCA_002689655.1_ASM268965v1	Tara Oceans Mediterranean	No	Yes	No	d__Bacteria;p__Planctomycetota;c__Planctomycetes;o__Pirellulales;f__Pirellulaceae;g__Rubripirellula;s__Rubripirellula	85.83	97.58	2.35	100	7093371	7001	156	156	73101	73084	45470	45425	316922	316859	51.9	1.5	85.93	5396
		GCA_002689825.1_ASM268982v1	Tara Oceans Mediterranean	No	Yes	No	d__Bacteria;p__Proteobacteria;c__Alphaproteobacteria;o__Caulobacterales;f__Hyphomonadaceae;g__Ponticaulis;s__Ponticaulis	74.3	99.45	5.03	66.67	3706849	571	29	29	306938	306831	127822	127802	634531	634451	55.2	1.2	91.39	3631
		GCA_002689845.1_ASM268984v1	Tara Oceans Mediterranean	No	Yes	No	d__Bacteria;p__Proteobacteria;c__Alphaproteobacteria;o__TMED127;f__TMED127;g__TMED13;s__TMED13	71.91	94.51	4.52	62.5	1380815	16902	57	57	31959	31492	24224	23928	94287	93089	29.9	1.99	96.33	1544
		GCA_002689925.1_ASM268992v1	Tara Oceans Mediterranean	No	Yes	No	d__Bacteria;p__Proteobacteria;c__Alphaproteobacteria;o__Pelagibacterales;f__Pelagibacteraceae;g__GCA-2689925;s__GCA-2689925	73.52	91.57	3.61	0	1605601	1002	73	73	33183	33183	21994	21980	82324	82324	29.2	4.49	96	1788
		GCA_002689965.1_ASM268996v1	Tara Oceans Mediterranean	No	Yes	No	d__Bacteria;p__Proteobacteria;c__Gammaproteobacteria;o__Enterobacterales;f__Alteromonadaceae;g__Pseudoalteromonas;s__Pseudoalteromonas	75.16	88.76	2.72	78.57	3841614	8437	181	181	24550	24550	21224	21177	92634	92356	41	1.31	88.87	3564
		GCA_002689995.1_ASM268999v1	Tara Oceans Mediterranean	No	Yes	No	d__Bacteria;p__Marinisomatota;c__Marinisomatia;o__SCGC-AAA003-L08;f__GCA-2689995;g__GCA-2689995;s__GCA-2689995	76.35	95.6	3.85	33.33	2909735	1570	87	87	62825	62808	33445	33427	228832	228809	29.5	4.92	94.06	2645
		GCA_002690485.1_ASM269048v1	Tara Oceans Mediterranean	No	Yes	No	d__Bacteria;p__Proteobacteria;c__Alphaproteobacteria;o__Micavibrionales;f__Micavibrionaceae;g__TMED27;s__TMED27	79.94	94.79	2.97	55.56	2544670	7404	25	25	226054	225360	101786	101490	562736	561022	42.5	3.16	92.41	2525
		GCA_002690565.1_ASM269056v1	Tara Oceans Mediterranean	No	Yes	No	d__Bacteria;p__Verrucomicrobiota;c__Verrucomicrobiae;o__Opitutales;f__Puniceicoccaceae;g__GCA-2690565;s__GCA-2690565	68.72	95.77	5.41	100	1312757	3529	37	37	49477	49242	35479	35384	84137	83848	38.4	2.34	94.24	1240
		GCA_002690655.1_ASM269065v1	Tara Oceans Mediterranean	No	Yes	No	d__Bacteria;p__Verrucomicrobiota;c__Verrucomicrobiae;o__Pedosphaerales;f__AAA164-E04;g__AAA164-E04;s__AAA164-E04	75.14	86.49	2.27	90	4083318	2227	35	35	165518	165422	116666	116602	343595	343473	47.8	1.1	90.21	3298
		GCA_002690685.1_ASM269068v1	Tara Oceans Mediterranean	No	Yes	No	d__Bacteria;p__Proteobacteria;c__Alphaproteobacteria;o__TMED26;f__TMED26;g__TMED26;s__TMED26	82.34	91.09	1.75	100	2975145	7991	88	88	55246	55037	33808	33717	133040	132638	55.1	3.2	91.81	2897
		GCA_002690705.1_ASM269070v1	Tara Oceans Mediterranean	No	Yes	No	d__Bacteria;p__Proteobacteria;c__Alphaproteobacteria;o__Rhodospirillales_A;f__UBA3470;g__TMED8;s__TMED8	93.35	95.85	0.5	100	3026532	201	21	21	224842	224838	144120	144111	281254	281230	46	0.87	85.98	2823
		GCA_002690755.1_ASM269075v1	Tara Oceans Mediterranean	No	Yes	No	d__Bacteria;p__Planctomycetota;c__Phycisphaerae;o__Phycisphaerales;f__SM1A02;g__UBA12014;s__UBA12014	73.92	94.32	4.08	80	3470013	6808	133	133	30393	30354	26090	26039	100296	100120	66.1	1.45	90.54	2916
		GCA_002690805.1_ASM269080v1	Tara Oceans Mediterranean	No	Yes	No	d__Bacteria;p__Bacteroidota;c__Bacteroidia;o__Flavobacteriales;f__Flavobacteriaceae;g__GCA-002723295;s__GCA-002723295	88.97	88.97	0	0	1381658	242	38	38	55811	55807	36359	36353	262255	262215	29.5	1.3	95.38	1354
		GCA_002690865.1_ASM269086v1	Tara Oceans Mediterranean	No	Yes	No	d__Bacteria;p__Proteobacteria;c__Gammaproteobacteria;o__Pseudomonadales;f__HTCC2089;g__UBA7455;s__UBA7455	81.11	90.51	1.88	0	2419185	17	46	46	106385	106385	52590	52590	236416	236416	43.4	3.65	91.26	2310
		GCA_002690915.1_ASM269091v1	Tara Oceans Mediterranean	No	Yes	No	d__Bacteria;p__Bacteroidota;c__Bacteroidia;o__Flavobacteriales;f__UA16;g__UA16;s__UA16	86.8	92.2	1.08	0	2388848	75	84	84	40344	40344	28438	28437	120382	120382	52.1	3.76	95.38	2026
		GCA_002690925.1_ASM269092v1	Tara Oceans Mediterranean	No	Yes	No	d__Bacteria;p__Planctomycetota;c__Planctomycetes;o__Pirellulales;f__Pirellulaceae;g__Rubripirellula;s__Rubripirellula	65.05	88.6	4.71	0	7781614	725	314	314	34947	34947	24782	24779	169231	169231	51.8	2.43	86.88	6167
		GCA_002690995.1_ASM269099v1	Tara Oceans Mediterranean	No	Yes	No	d__Bacteria;p__Proteobacteria;c__Alphaproteobacteria;o__Nisaeales;f__Nisaeaceae;g__GCA-002701455;s__GCA-002701455	72.47	89.97	3.5	0	3481274	170	154	154	28322	28322	22605	22604	123197	123197	41.6	2.26	91.28	3480
		GCA_002691125.1_ASM269112v1	Tara Oceans Mediterranean	No	Yes	No	d__Bacteria;p__Proteobacteria;c__Gammaproteobacteria;o__Enterobacterales;f__Alteromonadaceae;g__Alteromonas;s__Alteromonas	84.38	92.78	1.68	44.44	4366915	3655	100	100	68219	68143	43669	43632	225042	224777	44.1	1.67	87.61	3898
		GCA_002691145.1_ASM269114v1	Tara Oceans Mediterranean	No	Yes	No	d__Bacteria;p__Proteobacteria;c__Alphaproteobacteria;o__TMED127;f__TMED127;g__GCA-2691145;s__GCA-2691145	91.4	97.8	1.28	0	2028597	1081	29	29	165270	165254	69951	69914	387531	387291	31.1	5.29	95.19	2392
		GCA_002691205.1_ASM269120v1	Tara Oceans Mediterranean	No	Yes	No	d__Bacteria;p__Myxococcota;c__UBA9160;o__UBA9160;f__UBA4427;g__MED660;s__MED660	80.95	90.65	1.94	0	4558888	1084	120	120	62714	62714	37990	37981	164088	164086	54.2	2.46	89.74	3911
		GCA_002691215.1_ASM269121v1	Tara Oceans Mediterranean	No	Yes	No	d__Bacteria;p__Proteobacteria;c__Alphaproteobacteria;o__Caulobacterales;f__Hyphomonadaceae;g__Ponticaulis;s__Ponticaulis	91.84	93.94	0.42	33.33	3491745	104	26	26	217677	217677	134297	134293	866309	866309	54.7	2.57	91.21	3370
		GCA_002691245.1_ASM269124v1	Tara Oceans Mediterranean	No	Yes	No	d__Bacteria;p__Proteobacteria;c__Alphaproteobacteria;o__TMED127;f__TMED127;g__GCA-2691245;s__GCA-2691245	71.45	98.9	5.49	0	1685264	6029	67	67	38666	38523	25153	25063	175410	174570	30.3	5.78	95.61	1819
		GCA_002691265.1_ASM269126v1	Tara Oceans Mediterranean	No	Yes	No	d__Bacteria;p__Bacteroidota;c__Bacteroidia;o__Flavobacteriales;f__Flavobacteriaceae;g__MED-G13;s__MED-G13	70.2	92.95	4.55	73.68	1361524	7758	38	38	46682	46289	35829	35625	118319	117611	30.6	1.72	95.56	1291
		GCA_002691285.1_ASM269128v1	Tara Oceans Mediterranean	No	Yes	No	d__Bacteria;p__Marinisomatota;c__Marinisomatia;o__Marinisomatales;f__UBA1611;g__GCA-002708715;s__GCA-002708715	82.41	87.91	1.1	100	2229105	15085	113	113	23277	23061	19726	19593	81633	81285	32.8	2.16	94.4	2081
		GCA_002691425.1_ASM269142v1	Tara Oceans Mediterranean	No	Yes	No	d__Bacteria;p__Proteobacteria;c__Alphaproteobacteria;o__Rhodobacterales;f__Rhodobacteraceae;g__Sulfitobacter;s__Sulfitobacter	94.02	98.42	0.88	50	3500593	22212	88	88	55033	54663	39779	39527	228533	226885	60.4	4.41	90.82	3442
		GCA_002691465.1_ASM269146v1	Tara Oceans Mediterranean	No	Yes	No	d__Bacteria;p__Proteobacteria;c__Gammaproteobacteria;o__UBA11654;f__UBA11654;g__UBA11654;s__UBA11654	80.05	88.45	1.68	0	1402833	314	41	41	49369	49343	34215	34207	132097	132080	38.6	2.63	96.14	1428
		GCA_002691545.1_ASM269154v1	Tara Oceans Mediterranean	No	Yes	No	d__Bacteria;p__Proteobacteria;c__Alphaproteobacteria;o__Rhodobacterales;f__Rhodobacteraceae;g__HIMB11;s__HIMB11	69.43	85.78	3.27	100	2163676	9449	59	59	51815	51682	36672	36512	112431	112225	40.6	1.26	92.57	2147
		GCA_002691605.1_ASM269160v1	Tara Oceans Mediterranean	No	Yes	No	d__Bacteria;p__Bacteroidota;c__Bacteroidia;o__Flavobacteriales;f__UBA10066;g__MED-G20;s__MED-G20	79.05	91.4	2.47	89.47	2236066	5347	92	92	32654	32626	24305	24246	138860	138405	30.1	2.87	95.29	2059
		GCA_002691625.1_ASM269162v1	Tara Oceans Mediterranean	No	Yes	No	d__Bacteria;p__Proteobacteria;c__Gammaproteobacteria;o__Enterobacterales;f__Alteromonadaceae;g__Alteromonas_A;s__Alteromonas_A	74.59	87.34	2.55	18.75	3904616	24338	109	109	51041	50572	35822	35598	256219	253444	48.9	2.6	89.79	3529
		GCA_002691645.1_ASM269164v1	Tara Oceans Mediterranean	No	Yes	No	d__Bacteria;p__Bacteroidota;c__Bacteroidia;o__Flavobacteriales;f__Flavobacteriaceae;g__UBA3478;s__UBA3478	73.89	90.64	3.35	76.47	2479522	6049	62	62	68623	68584	39992	39894	354605	354150	38.1	7.32	93.45	2294
		GCA_002691705.1_ASM269170v1	Tara Oceans Mediterranean	No	Yes	No	d__Bacteria;p__Proteobacteria;c__Alphaproteobacteria;o__Pelagibacterales;f__Pelagibacteraceae;g__GCA-002704185;s__GCA-002704185	84.53	96.43	2.38	100	1879045	1738	60	60	64415	64358	31317	31288	293646	293646	31.8	4.96	95.69	2193
		GCA_002691715.1_ASM269171v1	Tara Oceans Mediterranean	No	Yes	No	d__Bacteria;p__Poribacteria;c__WGA-4E;o__WGA-4E;f__UBA9662;g__TMED15;s__TMED15	72.44	94.44	4.4	25	4811953	12309	217	217	28937	28868	22174	22118	95580	95124	40.2	2.8	86.17	4162
		GCA_002691725.1_ASM269172v1	Tara Oceans Mediterranean	No	Yes	No	d__Bacteria;p__Proteobacteria;c__Alphaproteobacteria;o__Puniceispirillales;f__UBA1172;g__UBA12202;s__UBA12202	76.69	85.39	1.74	71.43	2124773	2886	124	124	19179	19150	17135	17111	71032	70999	47.6	3.97	92.69	2141
		GCA_002691735.1_ASM269173v1	Tara Oceans Mediterranean	No	Yes	No	d__Bacteria;p__Proteobacteria;c__Alphaproteobacteria;o__Micavibrionales;f__TMED2;g__TMED2;s__TMED2	99.13	99.13	0	0	3619760	509	15	15	2086508	2086508	241317	241283	2086508	2086508	57.2	14.47	90.68	3445
		GCA_002691795.1_ASM269179v1	Tara Oceans Mediterranean	No	Yes	No	d__Bacteria;p__Proteobacteria;c__Alphaproteobacteria;o__Puniceispirillales;f__AAA536-G10;g__TMED54;s__TMED54	67.97	85.02	3.41	64.71	2035001	10182	82	82	32862	32677	24817	24692	79895	79296	28.8	1.66	95.11	2166
		GCA_002692055.1_ASM269205v1	Tara Oceans Mediterranean	No	Yes	No	d__Bacteria;p__Proteobacteria;c__Alphaproteobacteria;o__Pelagibacterales;f__Pelagibacteraceae;g__HIMB114;s__HIMB114	80.95	86.9	1.19	100	870948	1000	21	21	49855	49855	41473	41426	145779	145664	28.7	2.5	96.1	968
		GCA_002692065.1_ASM269206v1	Tara Oceans Mediterranean	No	Yes	No	d__Bacteria;p__Bacteroidota;c__Bacteroidia;o__Flavobacteriales;f__UBA7430;g__GCA-2692065;s__GCA-2692065	56.36	86.81	6.09	87.5	1650114	670	21	21	89526	89511	78576	78544	231889	231719	26.9	1.09	95.98	1449
		GCA_002692285.1_ASM269228v1	Tara Oceans Mediterranean	No	Yes	No	d__Bacteria;p__Proteobacteria;c__Alphaproteobacteria;o__Parvibaculales;f__RS24;g__UBA7378;s__	48.35	89.75	8.28	92.11	1861042	6018	45	45	53051	52906	41356	41222	135766	135194	56.4	2.08	93.86	1847
		GCA_002699795.1_ASM269979v1	Tara Oceans Mediterranean	No	Yes	No	d__Bacteria;p__Proteobacteria;c__Alphaproteobacteria;o__TMED109;f__TMED109;g__TMED109;s__TMED109	56.7	88.95	6.45	100	1877216	6771	72	72	38229	38075	26072	25978	115186	114902	29.7	2.07	95.09	1989
		GCA_002700505.1_ASM270050v1	Tara Oceans Mediterranean	No	Yes	No	d__Bacteria;p__Proteobacteria;c__Alphaproteobacteria;o__Rhizobiales;f__TMED25;g__TMED25;s__TMED25	49.85	91.75	8.38	28.57	1564032	12618	34	34	103630	102783	46000	45629	358688	355880	35.3	2.71	95.31	1591
		GCA_002700515.1_ASM270051v1	Tara Oceans Mediterranean	No	Yes	No	d__Bacteria;p__Proteobacteria;c__Alphaproteobacteria;o__Rhizobiales;f__TMED25;g__MED-G09;s__MED-G09	48.96	87.91	7.79	72.22	1488172	8367	49	49	40207	39835	30370	30200	144675	143642	31.6	2	95.4	1532
		GCA_002700545.1_ASM270054v1	Tara Oceans Mediterranean	No	Yes	No	d__Bacteria;p__Proteobacteria;c__Alphaproteobacteria;o__Rhizobiales;f__TMED25;g__TMED25;s__TMED25	56.47	91.97	7.1	100	1463536	680	13	13	382379	382286	112579	112527	471221	470947	33.3	0.91	94.44	1491
		GCA_002700945.1_ASM270094v1	Tara Oceans Mediterranean	No	Yes	No	d__Bacteria;p__Proteobacteria;c__Gammaproteobacteria;o__Pseudomonadales;f__HTCC2089;g__UBA7451;s__UBA7451	42.38	85.88	8.7	60.53	3796047	5008	37	37	139447	139233	102595	102460	316472	316211	55.1	0.92	89.64	3902
		GCA_002704225.1_ASM270422v1	Tara Oceans Mediterranean	No	Yes	No	d__Bacteria;p__Proteobacteria;c__Gammaproteobacteria;o__Pseudomonadales;f__HTCC2089;g__UBA4421;s__UBA4421	58.96	90.56	6.32	80.65	2909769	2929	63	63	76631	76520	46186	46140	216865	216570	55.1	1.35	91.97	2789
		GCA_002704305.1_ASM270430v1	Tara Oceans Mediterranean	No	Yes	No	d__Bacteria;p__Proteobacteria;c__Gammaproteobacteria;o__Pseudomonadales;f__Halieaceae;g__Luminiphilus;s__Luminiphilus	64.63	93.98	5.87	97.06	2606596	6445	39	39	95612	95157	66835	66670	257166	256746	53.2	1.33	91.98	2408
		GCA_002704365.1_ASM270436v1	Tara Oceans Mediterranean	No	Yes	No	d__Bacteria;p__Verrucomicrobiota;c__Kiritimatiellae;o__Kiritimatiellales;f__UBA1859;g__UBA1859;s__UBA1859	40.23	90.03	9.96	61.9	1647829	1510	46	46	50958	50925	35822	35789	252350	252165	47.7	2.91	94.17	1519
		GCA_002704405.1_ASM270440v1	Tara Oceans Mediterranean	No	Yes	No	d__Bacteria;p__Proteobacteria;c__Alphaproteobacteria;o__Rhodospirillales_A;f__UBA2165;g__TMED23;s__TMED23	58.33	93.18	6.97	90.48	2604406	6316	26	26	255024	254124	100169	99926	348200	347603	37.8	2.58	90.92	2441
		GCA_002704505.1_ASM270450v1	Tara Oceans Mediterranean	No	Yes	No	d__Bacteria;p__Proteobacteria;c__Alphaproteobacteria;o__Rhodobacterales;f__UBA8317;g__UBA8317;s__UBA8317	50.66	94.66	8.8	100	2165014	3136	32	32	119749	119659	67656	67558	375574	375186	50.9	3.76	93.05	2220
		GCA_002704685.1_ASM270468v1	Tara Oceans Mediterranean	No	Yes	No	d__Bacteria;p__Marinisomatota;c__Marinisomatia;o__SCGC-AAA003-L08;f__GCA-002707645;g__GCA-002707645;s__GCA-002707645	63.75	96.7	6.59	75	1674183	6695	46	46	48332	48217	36395	36249	160976	160331	27.6	2.66	96.57	1563
		GCA_002704755.1_ASM270475v1	Tara Oceans Mediterranean	No	Yes	No	d__Bacteria;p__Proteobacteria;c__Alphaproteobacteria;o__Rhizobiales;f__TMED25;g__TMED25;s__TMED25	73.72	93.27	3.91	90	1607798	2859	39	39	87336	87177	41225	41152	384135	383701	33.8	2.98	94.91	1696
		GCA_002705325.1_ASM270532v1	Tara Oceans Mediterranean	No	Yes	No	d__Bacteria;p__Proteobacteria;c__Gammaproteobacteria;o__Pseudomonadales;f__Litoricolaceae;g__Litoricola;s__Litoricola	57.65	90.2	6.51	84	1967603	13320	74	74	39535	39219	26589	26409	144762	143763	49.8	1.55	93.72	2055
		GCA_002705365.1_ASM270536v1	Tara Oceans Mediterranean	No	Yes	No	d__Bacteria;p__Marinisomatota;c__Marinisomatia;o__Marinisomatales;f__UBA1611;g__;s__	41.76	91.21	9.89	18.18	2656395	27873	83	83	42041	41473	32004	31668	117785	116655	33.7	3.32	94.84	2253
		GCA_002705545.1_ASM270554v1	Tara Oceans Mediterranean	No	Yes	No	d__Bacteria;p__Proteobacteria;c__Gammaproteobacteria;o__Pseudomonadales;f__Porticoccaceae;g__HTCC2207;s__HTCC2207	73.23	94.78	4.31	93.33	1433382	2958	31	31	64240	64240	46238	46142	130129	130033	42.3	1.13	92.57	1357
		GCA_002705565.1_ASM270556v1	Tara Oceans Mediterranean	No	Yes	No	d__Bacteria;p__Proteobacteria;c__Alphaproteobacteria;o__UBA7985;f__UBA7985;g__UBA7985;s__UBA7985	78.13	86.83	1.74	0	2996585	272	163	163	21864	21864	18383	18382	65923	65918	58.4	1.58	91.08	2718
		GCA_002705575.1_ASM270557v1	Tara Oceans Mediterranean	No	Yes	No	d__Bacteria;p__Marinisomatota;c__Marinisomatia;o__SCGC-AAA003-L08;f__GCA-002719095;g__GCA-002719095;s__GCA-002719095	67.56	92.31	4.95	0	1950198	31	78	78	34114	34114	25002	25002	98117	98117	29.6	2.33	96.38	1910
		GCA_002705795.1_ASM270579v1	Tara Oceans Mediterranean	No	Yes	No	d__Bacteria;p__Proteobacteria;c__Gammaproteobacteria;o__Pseudomonadales;f__Litoricolaceae;g__Litoricola;s__Litoricola	73.69	89.74	3.21	93.33	1788748	1955	31	31	84972	84910	57701	57638	211681	211559	50.6	2.4	94.06	1843
		GCA_002711215.1_ASM271121v1	Tara Oceans Mediterranean	No	Yes	No	d__Bacteria;p__Bacteroidota;c__Bacteroidia;o__Flavobacteriales;f__Flavobacteriaceae;g__UBA8316;s__UBA8316	68.45	94.85	5.28	91.67	2205922	42915	61	61	49165	48088	36162	35459	116981	113353	35.5	2.84	90.9	1977
		GCA_002711325.1_ASM271132v1	Tara Oceans Mediterranean	No	Yes	No	d__Bacteria;p__Proteobacteria;c__Gammaproteobacteria;o__Pseudomonadales;f__HTCC2089;g__UBA7451;s__	47.49	90.49	8.6	65.71	3392130	2841	62	62	74616	74513	54711	54665	244997	244803	53.1	1.7	88.77	3211
